# Supplementary material
Source: publisher figshare collection journal article supplement (https://geolsoc.figshare.com/ndownloader/files/15434012)
Supplement: Supplementary file 1 [file 15434012]

## Sheet: Tabelle1
Supplementary Table 1: Raw data of the heavy mineral sand measurements (120s) including data for the performance check sample CS-M2, a quartz blank (MB060), AC-E (granite, SARM), CRM-003 (alkaline granite, IAG) and AMIS0454 (ilmenite mineral sand, AMIS). Columns C and D provide information about the analysed materials.
File #	DateTime	Pos.	ID	Application	Method	CalFile1	CalFile2	ElapsedTime	Cal Check	MgO	MgO Err	Al2O3	Al2O3 Err	SiO2	SiO2 Err	P2O5	P2O5 Err	S	S Err	Cl	Cl Err	K2O	K2O Err	CaO	CaO Err	Ti	Ti Err	V	V Err	Cr	Cr Err	Mn	Mn Err	Fe	Fe Err	Co	Co Err	Ni	Ni Err	Cu	Cu Err	Zn	Zn Err	As	As Err	Se	Se Err	Rb	Rb Err
5110	09-24-2018 11:25	CS-M2	cal std	GeoChem	GeoChem Trace	DualSoil	DualSoil	60	Passed	< LOD	0.9883	11.9274	0.4903	70.8127	0.8272	0.0686	0.0315	0.1164	0.0195	0.0265	0.0213	4.822	0.047	0.9575	0.0225	0.1556	0.006	< LOD	0.0018	0.0071	0.0024	0.0961	0.0089	1.6145	0.0245	0	0	< LOD	0.002	0.0228	0.0019	0.0741	0.003	0.007	0.0019	< LOD	0.0006	0.0152	0.001
5111	09-24-2018 11:27	CS-M2	cal std	GeoChem	GeoChem Trace	DualSoil	DualSoil	60	Passed	1.218	1.0316	12.1017	0.4933	70.7247	0.8267	0.0553	0.0314	0.1306	0.0197	< LOD	0.0213	4.8143	0.047	0.9498	0.0224	0.1531	0.0059	< LOD	0.0018	0.0073	0.0024	0.0967	0.0089	1.6067	0.0245	0	0	< LOD	0.0019	0.022	0.0018	0.0725	0.0029	0.007	0.0018	< LOD	0.0006	0.0143	0.0009
5112	09-24-2018 11:28	CS-M2	cal std	GeoChem	GeoChem Trace	DualSoil	DualSoil	60	Passed	< LOD	1.1088	12.0766	0.4965	70.8354	0.8279	0.0567	0.0318	0.1259	0.0199	< LOD	0.0209	4.8438	0.0471	0.957	0.0225	0.1618	0.006	< LOD	0.0018	0.0062	0.0023	0.0973	0.0088	1.6083	0.0245	0	0	< LOD	0.0019	0.0233	0.0019	0.0722	0.0029	0.0079	0.0018	< LOD	0.0006	0.0143	0.0009
5113	09-24-2018 11:30	CS-M2	cal std	GeoChem	GeoChem Trace	DualSoil	DualSoil	60	Passed	< LOD	1.0473	12.176	0.495	70.7535	0.8267	0.0419	0.0306	0.1372	0.02	< LOD	0.0209	4.8191	0.047	0.9548	0.0225	0.1563	0.0059	< LOD	0.0018	0.0083	0.0024	0.0939	0.0088	1.6193	0.0246	0	0	0.0024	0.002	0.0234	0.0019	0.0719	0.0029	0.0075	0.0018	< LOD	0.0006	0.0148	0.0009
5114	09-24-2018 11:31	CS-M2	cal std	GeoChem	GeoChem Trace	DualSoil	DualSoil	60	Passed	< LOD	1.0322	12.2762	0.4973	70.7597	0.8268	0.0502	0.0316	0.1321	0.02	< LOD	0.021	4.7994	0.0468	0.9597	0.0224	0.1601	0.0059	< LOD	0.0018	0.0074	0.0024	0.099	0.0088	1.6193	0.0245	0	0	0.003	0.0019	0.0228	0.0019	0.0697	0.0028	0.0075	0.0017	< LOD	0.0006	0.014	0.0009
5115	09-24-2018 11:33	CS-M2	cal std	GeoChem	GeoChem Trace	DualSoil	DualSoil	60	Passed	< LOD	1.0191	11.9285	0.4904	70.4923	0.8247	0.0731	0.0309	0.1516	0.0201	< LOD	0.0208	4.8425	0.047	0.9823	0.0226	0.1576	0.0059	0.0022	0.0018	0.0073	0.0024	0.0926	0.0085	1.6232	0.0246	0	0	0.0032	0.002	0.0223	0.0019	0.0696	0.0028	0.0069	0.0018	< LOD	0.0005	0.0141	0.0009
5116	09-24-2018 11:34	CS-M2	cal std	GeoChem	GeoChem Trace	DualSoil	DualSoil	60	Passed	< LOD	1.0773	12.1705	0.4959	70.8099	0.8273	0.0547	0.0305	0.1383	0.0199	< LOD	0.0209	4.8407	0.047	0.9649	0.0225	0.157	0.0059	< LOD	0.0018	0.0062	0.0024	0.0947	0.0089	1.605	0.0245	0	0	< LOD	0.0019	0.0215	0.0018	0.0716	0.0028	0.0079	0.0017	< LOD	0.0006	0.0137	0.0009
5117	09-24-2018 11:36	CS-M2	cal std	GeoChem	GeoChem Trace	DualSoil	DualSoil	60	Passed	< LOD	1.0359	12.3677	0.4985	70.8572	0.8276	0.0771	0.031	0.1317	0.0196	< LOD	0.0211	4.8283	0.047	0.9564	0.0224	0.1542	0.0059	< LOD	0.0018	0.0066	0.0024	0.0928	0.0087	1.6245	0.0246	0	0	< LOD	0.002	0.023	0.0019	0.0726	0.0029	0.0069	0.0018	< LOD	0.0006	0.0144	0.0009
5118	09-24-2018 11:37	CS-M2	cal std	GeoChem	GeoChem Trace	DualSoil	DualSoil	60	Passed	< LOD	1.0847	11.9863	0.493	70.8134	0.8276	0.0673	0.0312	0.1289	0.0197	< LOD	0.021	4.8684	0.0472	0.9727	0.0226	0.1624	0.006	< LOD	0.0018	0.0094	0.0023	0.0934	0.0088	1.6115	0.0245	0	0	0.0023	0.0019	0.023	0.0019	0.0726	0.0029	0.007	0.0018	< LOD	0.0005	0.0144	0.0009
5119	09-24-2018 11:39	CS-M2	cal std	GeoChem	GeoChem Trace	DualSoil	DualSoil	60	Passed	< LOD	1.1019	12.2733	0.4994	70.5485	0.8258	0.0618	0.0316	0.1373	0.02	< LOD	0.0211	4.8629	0.0472	0.9727	0.0226	0.1572	0.006	< LOD	0.0018	0.0081	0.0024	0.0962	0.0088	1.605	0.0245	0	0	< LOD	0.0018	0.022	0.0018	0.0713	0.0028	0.0062	0.0017	< LOD	0.0005	0.0144	0.0009
5120	09-24-2018 11:41	CS-M2	cal std	GeoChem	GeoChem Trace	DualSoil	DualSoil	60	Passed	< LOD	1.0444	12.4912	0.5001	70.9264	0.8284	0.0642	0.031	0.1533	0.0202	< LOD	0.0211	4.8712	0.0472	0.9841	0.0227	0.1553	0.0059	< LOD	0.0018	0.009	0.0024	0.0933	0.0088	1.6008	0.0244	0	0	0.003	0.002	0.024	0.002	0.0739	0.0029	0.0062	0.0018	< LOD	0.0006	0.014	0.0009
5121	09-24-2018 11:42	CS-M2	cal std	GeoChem	GeoChem Trace	DualSoil	DualSoil	60	Passed	< LOD	1.0594	12.0234	0.4937	71.0661	0.8297	0.0593	0.0312	0.1423	0.02	< LOD	0.0213	4.8422	0.0471	0.9681	0.0226	0.1595	0.006	< LOD	0.0017	0.0078	0.0024	0.0943	0.0087	1.6258	0.0246	0	0	0.0031	0.002	0.0239	0.002	0.072	0.0029	0.0066	0.0018	< LOD	0.0006	0.0148	0.0009
5122	09-24-2018 11:44	CS-M2	cal std	GeoChem	GeoChem Trace	DualSoil	DualSoil	60	Passed	< LOD	1.0285	12.1998	0.4954	71.4805	0.833	0.072	0.0309	0.1211	0.0193	< LOD	0.0213	4.7979	0.0469	0.9706	0.0225	0.1572	0.0059	< LOD	0.0017	0.0075	0.0023	0.0921	0.0088	1.6159	0.0245	0	0	0.0032	0.002	0.0234	0.0019	0.071	0.0029	0.006	0.0018	< LOD	0.0006	0.0149	0.0009
5123	09-24-2018 11:45	CS-M2	cal std	GeoChem	GeoChem Trace	DualSoil	DualSoil	60	Passed	< LOD	1.0503	12.4014	0.4995	71.2396	0.8311	0.05	0.0314	0.129	0.0199	< LOD	0.021	4.8274	0.047	0.9877	0.0227	0.1588	0.006	< LOD	0.0017	0.0072	0.0024	0.0976	0.0088	1.6155	0.0245	0	0	0.0022	0.0019	0.0238	0.0019	0.0737	0.0029	0.0062	0.0018	< LOD	0.0006	0.0146	0.0009
5124	09-24-2018 11:47	CS-M2	cal std	GeoChem	GeoChem Trace	DualSoil	DualSoil	61	Passed	< LOD	1.0107	12.0341	0.4841	71.3144	0.818	0.0642	0.0305	0.1429	0.0196	< LOD	0.0207	4.8479	0.0463	0.9701	0.0222	0.1622	0.0059	0.0018	0.0017	0.0078	0.0023	0.0934	0.0088	1.6038	0.0245	0	0	0.0025	0.002	0.0218	0.0019	0.073	0.0029	0.0079	0.0018	< LOD	0.0006	0.0144	0.0009
5125	09-24-2018 11:49	CS-M2	cal std	GeoChem	GeoChem Trace			60.1	Passed	< LOD	1.0512	12.1876	0.495	70.9548	0.8273	0.0644	0.031	0.1376	0.0198	< LOD	0.021	4.8429	0.047	0.973	0.0226	0.1581	0.0059	< LOD	0.0018	0.0077	0.0024	0.094	0.0088	1.6131	0.0245	0	0	0.0023	0.002	0.0229	0.0019	0.0721	0.0029	0.0068	0.0018	< LOD	0.0006	0.0144	0.0009
5126	09-24-2018 11:51	MB060	qtz blank	GeoChem	GeoChem Trace	DualSoil	DualSoil	60	Passed	< LOD	0.7789	< LOD	0.1595	85.8859	0.9268	0.0563	0.0176	< LOD	0.0111	< LOD	0.0167	< LOD	0.0067	< LOD	0.0075	< LOD	0.0033	< LOD	0.0007	0.0064	0.0019	< LOD	0.0033	0.0265	0.0033	0	0	< LOD	0.0014	0.0028	0.0007	0.001	0.0005	< LOD	0.0005	< LOD	0.0004	< LOD	0.0005
5127	09-24-2018 11:52	MB060	qtz blank	GeoChem	GeoChem Trace	DualSoil	DualSoil	60	Passed	< LOD	0.7688	< LOD	0.1564	85.6868	0.9249	0.0563	0.0182	< LOD	0.0114	< LOD	0.0166	< LOD	0.0067	< LOD	0.0076	< LOD	0.0033	< LOD	0.0007	0.007	0.0018	< LOD	0.0032	0.0291	0.0035	0	0	< LOD	0.0014	0.0021	0.0007	0.0009	0.0005	< LOD	0.0005	< LOD	0.0004	< LOD	0.0005
5128	09-24-2018 11:54	MB060	qtz blank	GeoChem	GeoChem Trace	DualSoil	DualSoil	60	Passed	< LOD	0.7469	< LOD	0.1552	85.5592	0.9243	0.0687	0.0176	< LOD	0.0113	< LOD	0.0164	< LOD	0.0068	< LOD	0.0076	0.009	0.0034	< LOD	0.0007	0.0083	0.0018	< LOD	0.0032	0.0293	0.0036	0	0	< LOD	0.0015	0.0025	0.0007	0.001	0.0006	< LOD	0.0005	< LOD	0.0004	< LOD	0.0005
5129	09-24-2018 11:55	MB060	qtz blank	GeoChem	GeoChem Trace	DualSoil	DualSoil	60	Passed	< LOD	0.757	< LOD	0.1581	86.01	0.928	0.0555	0.0174	< LOD	0.0111	< LOD	0.0169	< LOD	0.0067	< LOD	0.0075	< LOD	0.0033	0.0007	0.0007	0.0089	0.0019	< LOD	0.0033	0.0292	0.0036	0	0	< LOD	0.0014	0.0026	0.0008	0.0008	0.0006	< LOD	0.0005	< LOD	0.0004	< LOD	0.0005
5130	09-24-2018 11:57	MB060	qtz blank	GeoChem	GeoChem Trace	DualSoil	DualSoil	60	Passed	< LOD	0.8049	< LOD	0.1521	86.1467	0.9293	0.0557	0.0174	0.0152	0.0116	< LOD	0.0171	< LOD	0.0068	< LOD	0.0075	< LOD	0.003	< LOD	0.0007	0.0059	0.0018	< LOD	0.0032	0.0298	0.0035	0	0	< LOD	0.0014	0.0022	0.0007	0.0011	0.0006	< LOD	0.0005	< LOD	0.0004	< LOD	0.0005
5131	09-24-2018 11:59	Granite AC-E	CRM	GeoChem	GeoChem Trace	DualSoil	DualSoil	120	Passed	< LOD	0.7309	13.3329	0.3591	67.1511	0.5614	< LOD	0.0227	< LOD	0.0109	< LOD	0.0145	4.2479	0.0312	0.4499	0.0122	0.0492	0.0031	0.0017	0.0012	0.0066	0.0016	0.0436	0.0045	1.5864	0.0169	0	0	< LOD	0.0012	0.0023	0.0007	0.0205	0.0011	< LOD	0.0004	< LOD	0.0004	0.0147	0.0006
5132	09-24-2018 12:02	Granite AC-E	CRM	GeoChem	GeoChem Trace	DualSoil	DualSoil	120	Passed	< LOD	0.6732	13.3102	0.358	67.5042	0.5632	< LOD	0.0225	< LOD	0.0109	< LOD	0.0145	4.2416	0.0311	0.4525	0.0122	0.0478	0.0031	0.0017	0.0012	0.0078	0.0016	0.0446	0.0046	1.5906	0.017	0	0	< LOD	0.0012	0.0018	0.0007	0.0206	0.0011	< LOD	0.0004	< LOD	0.0004	0.0145	0.0006
5133	09-24-2018 12:05	Granite AC-E	CRM	GeoChem	GeoChem Trace	DualSoil	DualSoil	120	Passed	< LOD	0.6982	13.3293	0.3583	67.4096	0.5627	< LOD	0.0225	< LOD	0.0112	< LOD	0.0146	4.2157	0.0311	0.4481	0.0123	0.0479	0.0031	0.0016	0.0012	0.007	0.0016	0.0425	0.0045	1.5787	0.0169	0	0	< LOD	0.0012	0.0019	0.0007	0.0199	0.0011	< LOD	0.0004	< LOD	0.0004	0.0145	0.0006
5134	09-24-2018 12:08	Granite AC-E	CRM	GeoChem	GeoChem Trace	DualSoil	DualSoil	120	Passed	< LOD	0.7364	13.21	0.3581	67.6571	0.5641	< LOD	0.0228	< LOD	0.0111	< LOD	0.0146	4.225	0.0311	0.4463	0.0122	0.0475	0.0031	< LOD	0.0012	0.0061	0.0016	0.0421	0.0046	1.585	0.0169	0	0	< LOD	0.0012	0.0019	0.0007	0.0205	0.0011	< LOD	0.0004	< LOD	0.0004	0.0149	0.0006
5135	09-24-2018 12:10	Granite AC-E	CRM	GeoChem	GeoChem Trace	DualSoil	DualSoil	120	Passed	< LOD	0.7039	13.8489	0.3642	67.6313	0.5639	< LOD	0.0228	< LOD	0.0111	< LOD	0.0148	4.2257	0.0311	0.4478	0.0122	0.0469	0.0031	0.0015	0.0012	0.0081	0.0016	0.0388	0.0046	1.582	0.0169	0	0	< LOD	0.0012	0.0018	0.0007	0.0208	0.0011	< LOD	0.0004	< LOD	0.0004	0.015	0.0006
5136	09-24-2018 12:13	NAM-MS40	cal sample	GeoChem	GeoChem Trace	DualSoil	DualSoil	120	Passed	1.5269	0.9145	7.574	0.323	62.2452	0.5728	0.1675	0.0384	< LOD	0.0138	0.0851	0.0184	0.7813	0.0165	2.4512	0.0249	1.9974	0.0145	0.0046	0.0027	< LOD	0.0033	0.701	0.015	12.9959	0.0502	0.0176	0.0018	0.0134	0.0037	0.0058	0.0019	0.0181	0.0019	< LOD	0.0007	< LOD	0.0008	0.0023	0.0008
5137	09-24-2018 12:16	NAM-MS40	cal sample	GeoChem	GeoChem Trace	DualSoil	DualSoil	120	Passed	1.7501	0.879	7.4311	0.3193	62.5082	0.5745	0.2056	0.0391	< LOD	0.0137	0.0897	0.0186	0.7919	0.0166	2.4187	0.0248	2.0005	0.0145	0.0062	0.0027	< LOD	0.0033	0.6965	0.015	12.9696	0.0501	0.0184	0.0018	0.0167	0.0037	0.0064	0.0018	0.0181	0.0018	< LOD	0.0007	< LOD	0.0008	0.0022	0.0008
5138	09-24-2018 12:19	NAM-MS40	cal sample	GeoChem	GeoChem Trace	DualSoil	DualSoil	120	Passed	1.4474	0.8694	7.6695	0.3236	62.8488	0.5766	0.2068	0.0385	< LOD	0.0136	0.099	0.0187	0.792	0.0166	2.4643	0.0249	1.9851	0.0144	0.0065	0.0027	< LOD	0.0033	0.7049	0.0151	13.0919	0.0504	0.0166	0.0017	0.0169	0.0037	0.0076	0.0018	0.0182	0.0018	< LOD	0.0007	< LOD	0.0008	0.0025	0.0008
5139	09-24-2018 12:21	NAM-MS40	cal sample	GeoChem	GeoChem Trace	DualSoil	DualSoil	120	Passed	1.7718	0.9108	7.4571	0.3208	62.3313	0.5735	0.1596	0.0381	< LOD	0.0136	0.0941	0.0185	0.7802	0.0165	2.4345	0.0248	2.0059	0.0145	0.0061	0.0027	< LOD	0.0033	0.7091	0.0152	13.0933	0.0504	0.0182	0.0018	0.0162	0.0039	0.0067	0.0019	0.0179	0.0019	< LOD	0.0008	< LOD	0.0009	0.0023	0.0009
5140	09-24-2018 12:24	NAM-MS40	cal sample	GeoChem	GeoChem Trace	DualSoil	DualSoil	120	Passed	1.5051	0.9111	7.4887	0.3218	62.6111	0.5752	0.1643	0.0384	< LOD	0.0137	0.0889	0.0185	0.7895	0.0166	2.4799	0.025	2.0283	0.0145	0.0068	0.0027	< LOD	0.0033	0.6887	0.0149	13.108	0.0505	0.0171	0.0018	0.0153	0.0038	0.0053	0.0019	0.0177	0.0019	< LOD	0.0007	< LOD	0.0008	0.0028	0.0008
5141	09-24-2018 12:27	NAM-MS12	cal sample	GeoChem	GeoChem Trace	DualSoil	DualSoil	120	Passed	1.1856	1.0583	4.04	0.3082	15.5771	0.3018	< LOD	0.0507	< LOD	0.0227	0.1951	0.019	0.2652	0.0139	1.0202	0.0204	11.1413	0.0429	0.0179	0.0106	< LOD	0.0078	0.5324	0.013	34.0816	0.0885	0.3349	0.0174	0.059	0.0107	0.0127	0.0036	0.0209	0.0028	< LOD	0.0009	0.0021	0.0014	0.007	0.0016
5142	09-24-2018 12:30	NAM-MS12	cal sample	GeoChem	GeoChem Trace	DualSoil	DualSoil	120	Passed	1.2619	1.0527	4.1377	0.3059	15.3974	0.2995	< LOD	0.0501	< LOD	0.0227	0.1688	0.0188	0.2637	0.014	1.0168	0.0205	11.1142	0.0428	0.0237	0.0106	< LOD	0.0077	0.5344	0.0131	34.0203	0.0884	0.3416	0.0175	0.053	0.0103	0.015	0.0036	0.0195	0.0028	< LOD	0.0009	0.0017	0.0014	0.0069	0.0016
5143	09-24-2018 12:32	NAM-MS12	cal sample	GeoChem	GeoChem Trace	DualSoil	DualSoil	120	Passed	1.2196	1.0457	4.3196	0.3114	15.445	0.3001	< LOD	0.0504	< LOD	0.0227	0.1917	0.0187	0.2623	0.0138	1.0284	0.0204	11.1474	0.0428	0.0221	0.0106	< LOD	0.0078	0.5346	0.013	34.0798	0.0885	0.3458	0.0173	0.0548	0.0101	0.0136	0.0034	0.0216	0.0028	< LOD	0.0009	0.0017	0.0014	0.0071	0.0016
5144	09-24-2018 12:35	NAM-MS12	cal sample	GeoChem	GeoChem Trace	DualSoil	DualSoil	120	Passed	1.5838	1.0943	3.9051	0.3065	15.5787	0.3017	< LOD	0.0501	< LOD	0.0227	0.2113	0.0191	0.2597	0.0139	1.0037	0.0203	11.2103	0.043	< LOD	0.0106	< LOD	0.0078	0.5359	0.013	34.1003	0.0885	0.3316	0.0173	0.0554	0.0103	0.0127	0.0035	0.02	0.0028	< LOD	0.0009	0.0021	0.0014	0.0066	0.0016
5145	09-24-2018 12:37	NAM-MS12	cal sample	GeoChem	GeoChem Trace	DualSoil	DualSoil	120	Passed	2.3243	1.0854	4.1654	0.3056	15.4759	0.3	< LOD	0.0499	< LOD	0.0224	0.195	0.0192	0.2516	0.0138	1.0174	0.0204	11.1118	0.0428	0.0127	0.0106	< LOD	0.0078	0.5295	0.013	34.044	0.0884	0.3363	0.0173	0.0633	0.0116	0.0148	0.0039	0.0211	0.0031	< LOD	0.001	< LOD	0.0016	0.0081	0.0018
5146	09-24-2018 12:41	NAM-MS3	sample	GeoChem	GeoChem Trace	DualSoil	DualSoil	120	Passed	1.9602	1.0385	9.4178	0.3778	30.6541	0.4039	< LOD	0.0412	< LOD	0.0189	0.09	0.0171	0.1982	0.0122	2.1415	0.0254	3.3303	0.0214	0.0324	0.0058	< LOD	0.0054	0.9345	0.0169	23.8861	0.0689	0.0907	0.0105	0.0298	0.006	0.0088	0.0025	0.0183	0.0022	< LOD	0.0007	< LOD	0.001	0.0048	0.0011
5147	09-24-2018 12:43	NAM-MS3	sample	GeoChem	GeoChem Trace	DualSoil	DualSoil	120	Passed	1.9263	1.057	9.4728	0.3801	30.9939	0.4069	< LOD	0.0418	< LOD	0.0189	0.0967	0.0173	0.2068	0.0122	2.1764	0.0255	3.348	0.0215	0.0286	0.0057	< LOD	0.0054	0.9505	0.0171	24.1048	0.0694	0.0948	0.0105	0.0307	0.0064	0.0092	0.0026	0.0189	0.0023	< LOD	0.0008	< LOD	0.0011	0.0036	0.0011
5148	09-24-2018 12:46	NAM-MS3	sample	GeoChem	GeoChem Trace	DualSoil	DualSoil	120	Passed	2.1167	1.0944	9.4988	0.3806	30.866	0.4062	< LOD	0.0422	< LOD	0.019	0.0778	0.0172	0.195	0.0124	2.1589	0.0255	3.3428	0.0215	0.0231	0.0058	< LOD	0.0055	0.9519	0.017	24.0119	0.0692	0.0917	0.0105	0.0338	0.0062	0.0106	0.0025	0.0199	0.0022	< LOD	0.0008	< LOD	0.0011	0.0041	0.0011
5149	09-24-2018 12:48	NAM-MS3	sample	GeoChem	GeoChem Trace	DualSoil	DualSoil	120	Passed	2.4175	1.1175	9.6456	0.3829	30.8814	0.406	< LOD	0.0417	< LOD	0.0187	0.0802	0.0174	0.1924	0.0124	2.1572	0.0256	3.3443	0.0215	0.0213	0.0058	< LOD	0.0055	0.9366	0.0169	24.183	0.0695	0.0966	0.0105	0.0296	0.0064	0.011	0.0026	0.0211	0.0023	< LOD	0.0008	< LOD	0.0011	0.0037	0.0011
5150	09-24-2018 12:51	NAM-MS3	sample	GeoChem	GeoChem Trace	DualSoil	DualSoil	120	Passed	2.0478	1.0892	9.6556	0.3823	31.296	0.4086	< LOD	0.0409	< LOD	0.0185	0.0766	0.0174	0.2042	0.0125	2.1759	0.0256	3.3318	0.0214	0.0185	0.0058	< LOD	0.0055	0.945	0.017	24.2144	0.0695	0.0968	0.0104	0.0307	0.0063	0.0091	0.0026	0.0208	0.0023	< LOD	0.0008	< LOD	0.0011	0.0042	0.0012
5151	09-24-2018 12:54	NAM-MS4	sample	GeoChem	GeoChem Trace	DualSoil	DualSoil	120	Passed	2.218	1.1127	8.5686	0.3682	25.7475	0.3712	< LOD	0.0434	< LOD	0.02	0.2718	0.0183	0.1441	0.0117	2.2719	0.0263	4.2169	0.0246	0.0298	0.0066	< LOD	0.0057	0.8742	0.0165	25.1575	0.0717	0.109	0.0122	0.0361	0.0074	0.0124	0.0029	0.0226	0.0025	< LOD	0.0008	0.0013	0.0012	0.0049	0.0013
5152	09-24-2018 12:56	NAM-MS4	sample	GeoChem	GeoChem Trace	DualSoil	DualSoil	120	Passed	2.1868	1.1113	8.6917	0.3707	26.1415	0.3743	< LOD	0.0439	< LOD	0.0199	0.2886	0.0183	0.1259	0.0118	2.2729	0.0264	4.1863	0.0245	0.0287	0.0066	< LOD	0.0059	0.8875	0.0165	25.2318	0.0718	0.1073	0.012	0.0385	0.0072	0.0133	0.003	0.0205	0.0024	< LOD	0.0008	< LOD	0.0011	0.0043	0.0012
5153	09-24-2018 12:59	NAM-MS4	sample	GeoChem	GeoChem Trace	DualSoil	DualSoil	120	Passed	1.8396	1.1197	8.6363	0.3714	26.187	0.3748	< LOD	0.0441	< LOD	0.02	0.2985	0.0183	0.1335	0.0118	2.2788	0.0264	4.1995	0.0246	0.0236	0.0066	< LOD	0.0059	0.8915	0.0166	25.2298	0.0718	0.1164	0.0121	0.0368	0.0073	0.0111	0.003	0.0192	0.0024	< LOD	0.0008	< LOD	0.0011	0.0039	0.0012
5154	09-24-2018 13:01	NAM-MS4	sample	GeoChem	GeoChem Trace	DualSoil	DualSoil	120	Passed	2.0753	1.1095	8.7368	0.3723	26.1315	0.3744	< LOD	0.0441	< LOD	0.02	0.2738	0.0181	0.1357	0.0118	2.2812	0.0263	4.1607	0.0244	0.0293	0.0067	< LOD	0.0059	0.8892	0.0165	25.2152	0.0717	0.1059	0.012	0.0368	0.0072	0.0099	0.0028	0.0243	0.0026	< LOD	0.0008	< LOD	0.0012	0.0046	0.0012
5155	09-24-2018 13:04	NAM-MS4	sample	GeoChem	GeoChem Trace	DualSoil	DualSoil	120	Passed	2.2068	1.1362	8.564	0.3688	25.938	0.3726	< LOD	0.0438	< LOD	0.0201	0.2833	0.0183	0.128	0.0118	2.285	0.0264	4.1933	0.0246	0.0261	0.0067	< LOD	0.0059	0.8895	0.0166	25.195	0.0717	0.1141	0.0122	0.0388	0.0075	0.0113	0.003	0.0222	0.0025	< LOD	0.0008	< LOD	0.0012	0.0039	0.0013
5156	09-24-2018 13:07	NAM-MS16	sample	GeoChem	GeoChem Trace	DualSoil	DualSoil	120	Passed	1.5858	0.809	6.5031	0.2835	72.5414	0.607	0.4385	0.0381	0.0134	0.012	0.3645	0.0197	0.9621	0.0167	3.6319	0.028	0.9067	0.0093	0.0047	0.0016	0.0086	0.0021	0.3137	0.0103	5.0284	0.0312	0	0	0.0052	0.002	0.0047	0.0012	0.0162	0.0013	< LOD	0.0006	< LOD	0.0006	0.0034	0.0006
5157	09-24-2018 13:10	NAM-MS16	sample	GeoChem	GeoChem Trace	DualSoil	DualSoil	120	Passed	1.4659	0.8139	6.534	0.285	73.0577	0.6102	0.4433	0.0381	0.0152	0.012	0.3513	0.0198	0.9688	0.0168	3.6674	0.0282	0.9021	0.0093	0.0047	0.0016	0.0077	0.0021	0.314	0.0103	5.0937	0.0315	0	0	0.007	0.0021	0.0047	0.0012	0.0166	0.0014	< LOD	0.0006	< LOD	0.0006	0.0036	0.0006
5158	09-24-2018 13:12	NAM-MS16	sample	GeoChem	GeoChem Trace	DualSoil	DualSoil	120	Passed	1.2328	0.8045	6.471	0.2832	72.7738	0.6084	0.4304	0.0374	0.0173	0.0119	0.3467	0.0196	0.9427	0.0165	3.6278	0.028	0.871	0.0091	0.0038	0.0016	0.0096	0.0021	0.3193	0.0104	5.0872	0.0314	0	0	0.0056	0.0021	0.0054	0.0012	0.0183	0.0014	< LOD	0.0006	< LOD	0.0006	0.0034	0.0006
5159	09-24-2018 13:15	NAM-MS16	sample	GeoChem	GeoChem Trace	DualSoil	DualSoil	120	Passed	1.4231	0.8205	6.7529	0.2872	73.0021	0.6096	0.4489	0.0377	0.0199	0.0119	0.3455	0.0196	0.9521	0.0166	3.6129	0.028	0.8802	0.0092	0.0051	0.0016	0.0097	0.0021	0.3164	0.0103	5.0342	0.0312	0	0	0.0061	0.0021	0.0054	0.0012	0.0167	0.0014	< LOD	0.0006	< LOD	0.0006	0.0036	0.0006
5160	09-24-2018 13:17	NAM-MS16	sample	GeoChem	GeoChem Trace	DualSoil	DualSoil	120	Passed	1.669	0.804	6.6579	0.2858	73.2435	0.6113	0.4375	0.0376	0.0241	0.0119	0.3628	0.0198	0.9636	0.0167	3.6437	0.0281	0.8961	0.0093	0.005	0.0016	0.0091	0.0021	0.3224	0.0104	5.0799	0.0314	0	0	0.0052	0.0021	0.0046	0.0012	0.0174	0.0014	< LOD	0.0006	< LOD	0.0006	0.0031	0.0006
5161	09-24-2018 13:21	NAM-MS20	sample	GeoChem	GeoChem Trace	DualSoil	DualSoil	120	Passed	1.7033	0.9739	8.7149	0.3389	57.1768	0.5423	0.5425	0.0444	< LOD	0.0143	0.2438	0.0192	0.5432	0.0144	4.149	0.0314	1.6789	0.0136	0.0088	0.0029	< LOD	0.0032	0.758	0.0155	12.8606	0.0506	0.0213	0.0026	0.0141	0.0033	0.0069	0.0017	0.0281	0.002	< LOD	0.0007	< LOD	0.0007	0.0022	0.0007
5162	09-24-2018 13:23	NAM-MS20	sample	GeoChem	GeoChem Trace	DualSoil	DualSoil	120	Passed	1.3823	0.9678	8.4412	0.334	57.734	0.5455	0.528	0.0446	< LOD	0.0145	0.2314	0.0192	0.5224	0.0143	4.1618	0.0315	1.6805	0.0136	0.0052	0.0029	< LOD	0.0032	0.763	0.0156	12.851	0.0506	0.0189	0.0026	0.0138	0.0033	0.0068	0.0017	0.0266	0.002	< LOD	0.0007	< LOD	0.0007	0.0027	0.0007
5163	09-24-2018 13:26	NAM-MS20	sample	GeoChem	GeoChem Trace	DualSoil	DualSoil	120	Passed	1.6257	0.9373	8.6466	0.3351	58.0316	0.5469	0.5493	0.0439	< LOD	0.0141	0.25	0.0193	0.5577	0.0144	4.1903	0.0315	1.6594	0.0135	0.0063	0.0028	< LOD	0.0031	0.7425	0.0154	12.7788	0.0504	0.0185	0.0025	0.0136	0.0034	0.0066	0.0017	0.0274	0.002	< LOD	0.0007	< LOD	0.0007	0.0021	0.0007
5164	09-24-2018 13:28	NAM-MS20	sample	GeoChem	GeoChem Trace	DualSoil	DualSoil	120	Passed	1.6774	0.9938	8.8359	0.3408	57.9919	0.5471	0.5579	0.0447	< LOD	0.0142	0.2573	0.0195	0.5508	0.0144	4.1752	0.0314	1.6214	0.0133	0.0076	0.0028	< LOD	0.0031	0.7595	0.0156	12.7995	0.0505	0.0194	0.0025	0.0117	0.0032	0.007	0.0017	0.0271	0.0019	< LOD	0.0007	< LOD	0.0007	0.0023	0.0007
5165	09-24-2018 13:31	NAM-MS20	sample	GeoChem	GeoChem Trace	DualSoil	DualSoil	120	Passed	1.6453	0.9712	8.6527	0.3356	57.826	0.5456	0.5344	0.0438	< LOD	0.0142	0.2377	0.0192	0.5426	0.0143	4.1983	0.0315	1.6608	0.0135	0.0087	0.0029	< LOD	0.0031	0.7351	0.0153	12.8203	0.0505	0.0172	0.0025	0.0114	0.0032	0.0062	0.0016	0.0271	0.002	< LOD	0.0007	< LOD	0.0007	0.0021	0.0007
5166	09-24-2018 14:08	AMIS0454	CRM	GeoChem	GeoChem Trace	DualSoil	DualSoil	120	Passed	1.7149	1.2412	1.7788	0.2448	2.9356	0.1541	< LOD	0.0361	< LOD	0.0222	< LOD	0.0162	0.0575	0.0127	0.1882	0.0151	37.3055	0.0815	< LOD	0.0202	< LOD	0.0063	0.4105	0.011	27.4686	0.0928	0.337	0.0158	0.041	0.0081	0.0103	0.0023	0.0421	0.003	< LOD	0.0006	< LOD	0.0012	0.0023	0.0012
5167	09-24-2018 14:10	AMIS0454	CRM	GeoChem	GeoChem Trace	DualSoil	DualSoil	120	Passed	1.6564	1.2081	1.8807	0.2447	2.8877	0.1531	< LOD	0.0363	< LOD	0.0222	< LOD	0.016	0.0605	0.0125	0.1969	0.0151	37.1776	0.0813	< LOD	0.0202	< LOD	0.0062	0.4173	0.0109	27.462	0.0927	0.3492	0.0159	0.0428	0.0077	0.0111	0.0023	0.0391	0.0029	< LOD	0.0006	< LOD	0.0011	0.0027	0.0012
5168	09-24-2018 14:13	AMIS0454	CRM	GeoChem	GeoChem Trace	DualSoil	DualSoil	120	Passed	1.3156	1.1991	1.8772	0.2451	2.9729	0.1545	< LOD	0.0362	< LOD	0.0223	< LOD	0.016	0.0636	0.0127	0.192	0.0151	37.2159	0.0814	< LOD	0.0202	< LOD	0.0063	0.4167	0.011	27.394	0.0926	0.3464	0.0159	0.0409	0.0076	0.0096	0.0022	0.0377	0.0028	< LOD	0.0006	< LOD	0.0011	0.0023	0.0012
5169	09-24-2018 14:16	AMIS0454	CRM	GeoChem	GeoChem Trace	DualSoil	DualSoil	120	Passed	1.7132	1.263	1.8179	0.2478	2.8966	0.1535	< LOD	0.0356	< LOD	0.0221	< LOD	0.016	0.0726	0.0127	0.1909	0.0151	37.2992	0.0815	< LOD	0.0202	< LOD	0.0062	0.4123	0.0109	27.5684	0.093	0.3371	0.0158	0.0451	0.0078	0.0114	0.0023	0.0393	0.0029	< LOD	0.0006	< LOD	0.0011	0.0023	0.0013
5170	09-24-2018 14:18	AMIS0454	CRM	GeoChem	GeoChem Trace	DualSoil	DualSoil	120	Passed	1.8546	1.3098	1.849	0.2481	2.8937	0.1537	< LOD	0.036	< LOD	0.0223	< LOD	0.0163	0.0549	0.0127	0.1832	0.0152	37.1764	0.0813	< LOD	0.0202	< LOD	0.0062	0.4208	0.011	27.559	0.0929	0.3375	0.0158	0.04	0.0078	0.0113	0.0024	0.0409	0.003	< LOD	0.0006	< LOD	0.0011	0.0031	0.0013
5171	09-24-2018 14:21	NAM-MS19	cal sample	GeoChem	GeoChem Trace	DualSoil	DualSoil	120	Passed	1.2348	0.8481	8.4036	0.3257	65.3448	0.5829	0.3867	0.0383	< LOD	0.0126	0.0647	0.0174	0.6477	0.0149	3.3739	0.0281	1.0681	0.0106	0.0075	0.0021	< LOD	0.0027	0.6645	0.0146	10.6701	0.0453	0.0076	0.001	0.0097	0.0028	0.0072	0.0015	0.0229	0.0017	< LOD	0.0006	< LOD	0.0007	0.0024	0.0007
5172	09-24-2018 14:24	NAM-MS19	cal sample	GeoChem	GeoChem Trace	DualSoil	DualSoil	120	Passed	1.7563	0.8784	8.3689	0.325	65.2738	0.582	0.3983	0.0379	< LOD	0.0122	0.0847	0.0176	0.6445	0.0148	3.361	0.028	1.072	0.0106	0.007	0.0021	0.0035	0.0027	0.6675	0.0146	10.6383	0.0453	0.0082	0.001	0.0093	0.0028	0.006	0.0015	0.0213	0.0017	< LOD	0.0006	< LOD	0.0007	0.0028	0.0007
5173	09-24-2018 14:27	NAM-MS19	cal sample	GeoChem	GeoChem Trace	DualSoil	DualSoil	120	Passed	1.5452	0.8906	8.362	0.3249	65.7787	0.5853	0.4172	0.0382	< LOD	0.0123	0.0866	0.0178	0.6517	0.015	3.3886	0.0281	1.0752	0.0106	0.0072	0.0021	0.0029	0.0028	0.6642	0.0145	10.6781	0.0454	0.008	0.0009	0.0096	0.0028	0.006	0.0015	0.0214	0.0017	< LOD	0.0006	< LOD	0.0006	0.0018	0.0007
5174	09-24-2018 14:29	NAM-MS19	cal sample	GeoChem	GeoChem Trace	DualSoil	DualSoil	120	Passed	1.9115	0.8859	8.5583	0.3274	65.8842	0.5858	0.402	0.0381	< LOD	0.0123	0.0841	0.018	0.6367	0.0148	3.3416	0.0279	1.0272	0.0103	0.0059	0.002	< LOD	0.0027	0.6812	0.0147	10.649	0.0453	0.0071	0.0009	0.0107	0.0028	0.007	0.0014	0.0225	0.0017	< LOD	0.0006	< LOD	0.0006	0.0024	0.0007
5175	09-24-2018 14:32	NAM-MS19	cal sample	GeoChem	GeoChem Trace	DualSoil	DualSoil	120	Passed	1.2528	0.8648	8.2314	0.3223	65.2922	0.582	0.4073	0.038	< LOD	0.0125	0.0813	0.0174	0.6432	0.0148	3.3464	0.0279	1.0666	0.0105	0.0071	0.0021	0.0041	0.0027	0.6633	0.0146	10.5827	0.0452	0.0073	0.001	0.0094	0.0028	0.0057	0.0015	0.0227	0.0018	< LOD	0.0007	< LOD	0.0007	0.0025	0.0007
5176	09-24-2018 14:35	NAM-MS5	cal sample	GeoChem	GeoChem Trace	DualSoil	DualSoil	120	Passed	1.5791	1.1119	5.7462	0.3354	14.5072	0.2887	< LOD	0.046	< LOD	0.0214	0.0562	0.0167	0.1011	0.0118	1.2285	0.0216	10.1898	0.0404	< LOD	0.0104	< LOD	0.007	0.8717	0.0162	31.3628	0.0838	0.2628	0.0168	0.0489	0.0094	0.0121	0.0033	0.0217	0.0027	< LOD	0.0008	0.0014	0.0013	0.0071	0.0015
5177	09-24-2018 14:39	NAM-MS5	cal sample	GeoChem	GeoChem Trace	DualSoil	DualSoil	120	Passed	1.6408	1.1054	5.989	0.3399	14.3219	0.2872	< LOD	0.0467	< LOD	0.0215	0.0643	0.0168	0.0999	0.0117	1.2421	0.0217	10.2039	0.0403	< LOD	0.0104	< LOD	0.007	0.8752	0.0163	31.2401	0.0836	0.2521	0.0167	0.0489	0.0093	0.0119	0.0032	0.0223	0.0027	< LOD	0.0008	< LOD	0.0013	0.0052	0.0015
5178	09-24-2018 14:42	NAM-MS5	cal sample	GeoChem	GeoChem Trace	DualSoil	DualSoil	120	Passed	1.9383	1.1089	5.9925	0.3393	14.5795	0.2897	< LOD	0.0462	< LOD	0.0217	0.0666	0.017	0.1055	0.0119	1.2316	0.0216	10.2139	0.0404	0.0168	0.0104	< LOD	0.007	0.8562	0.0161	31.5416	0.084	0.2573	0.0167	0.0435	0.0091	0.0123	0.0032	0.0235	0.0027	< LOD	0.0008	< LOD	0.0013	0.0059	0.0015
5179	09-24-2018 14:44	NAM-MS5	cal sample	GeoChem	GeoChem Trace	DualSoil	DualSoil	120	Passed	1.3915	1.083	6.138	0.342	14.5853	0.2896	< LOD	0.047	< LOD	0.0216	0.0571	0.0169	0.101	0.0118	1.2194	0.0215	10.1404	0.0402	< LOD	0.0103	< LOD	0.007	0.8471	0.016	31.3683	0.0838	0.2613	0.0167	0.0561	0.0095	0.0124	0.0033	0.0215	0.0027	< LOD	0.0008	< LOD	0.0013	0.0054	0.0015
5180	09-24-2018 14:47	NAM-MS5	cal sample	GeoChem	GeoChem Trace	DualSoil	DualSoil	120	Passed	1.8634	1.0585	6.0317	0.3372	14.5214	0.2883	< LOD	0.0457	< LOD	0.0213	0.0756	0.0172	0.0947	0.0117	1.246	0.0217	10.1199	0.0402	< LOD	0.0104	< LOD	0.007	0.864	0.0162	31.3874	0.0838	0.2661	0.0167	0.0456	0.0093	0.0103	0.0032	0.0263	0.0028	< LOD	0.0008	< LOD	0.0013	0.0064	0.0015
5181	09-24-2018 14:50	NAM-MS44	sample	GeoChem	GeoChem Trace	DualSoil	DualSoil	120	Passed	1.8839	1.0881	9.4962	0.3706	33.8494	0.4196	0.1366	0.0467	< LOD	0.0187	0.3301	0.0188	0.1915	0.012	3.1854	0.0296	3.8335	0.0223	< LOD	0.0057	< LOD	0.0047	1.1376	0.0187	20.1384	0.0642	0.07	0.0088	0.0289	0.0054	0.0098	0.0023	0.0265	0.0023	< LOD	0.0007	< LOD	0.001	0.0018	0.001
5182	09-24-2018 14:53	NAM-MS44	sample	GeoChem	GeoChem Trace	DualSoil	DualSoil	120	Passed	1.9617	1.0791	9.7161	0.3731	34.209	0.4218	0.1317	0.0469	< LOD	0.0184	0.3371	0.019	0.2043	0.0121	3.2142	0.0296	3.7752	0.0221	< LOD	0.0057	< LOD	0.0047	1.1359	0.0187	20.1524	0.0642	0.067	0.0087	0.0265	0.0054	0.0081	0.0024	0.026	0.0023	< LOD	0.0007	< LOD	0.001	0.002	0.001
5183	09-24-2018 14:55	NAM-MS44	sample	GeoChem	GeoChem Trace	DualSoil	DualSoil	120	Passed	2.4503	1.1321	9.8919	0.3775	34.153	0.4217	0.158	0.0471	< LOD	0.0183	0.3397	0.0191	0.1948	0.012	3.1915	0.0295	3.7562	0.022	0.0079	0.0057	< LOD	0.0047	1.1436	0.0187	20.2901	0.0644	0.0649	0.0086	0.0246	0.0052	0.008	0.0022	0.0266	0.0023	< LOD	0.0007	0.0011	0.0009	0.0012	0.001
5184	09-24-2018 14:58	NAM-MS44	sample	GeoChem	GeoChem Trace	DualSoil	DualSoil	120	Passed	2.0384	1.1087	9.8628	0.3756	33.9587	0.4202	0.1299	0.0468	< LOD	0.0185	0.3211	0.019	0.1968	0.012	3.1618	0.0294	3.7511	0.022	0.0059	0.0057	< LOD	0.0047	1.1345	0.0186	20.1043	0.0641	0.064	0.0087	0.0268	0.0055	0.0063	0.0023	0.0265	0.0024	< LOD	0.0007	< LOD	0.001	0.0024	0.001
5185	09-24-2018 15:01	NAM-MS44	sample	GeoChem	GeoChem Trace		DualSoil	120	Passed	1.8734	1.1153	9.6582	0.3733	33.6716	0.4185	0.1369	0.0472	< LOD	0.0185	0.3414	0.0188	0.1896	0.012	3.1948	0.0296	3.7743	0.0222	0.0087	0.0058	< LOD	0.0047	1.1764	0.019	20.2482	0.0644	0.0632	0.0088	0.0243	0.0054	0.0079	0.0024	0.0255	0.0023	< LOD	0.0007	< LOD	0.001	0.0015	0.001
5186	09-24-2018 15:05	NAM-MS2	sample	GeoChem	GeoChem Trace	DualSoil	DualSoil	120	Passed	4.8624	1.0544	4.766	0.272	61.2784	0.5595	0.0599	0.0383	< LOD	0.0119	0.2704	0.0194	0.539	0.0141	7.1899	0.0398	2.2069	0.0158	0.0137	0.003	0.0404	0.0033	0.2598	0.0098	8.8993	0.0439	0.0106	0.0016	0.0175	0.0031	0.009	0.0017	0.0132	0.0015	< LOD	0.0006	< LOD	0.0007	0.0018	0.0007
5187	09-24-2018 15:07	NAM-MS2	sample	GeoChem	GeoChem Trace	DualSoil	DualSoil	120	Passed	4.7187	1.0537	4.9758	0.2761	61.6917	0.5616	0.0558	0.0386	< LOD	0.0121	0.2613	0.0195	0.5248	0.014	7.2078	0.0398	2.1667	0.0156	0.0141	0.003	0.0426	0.0033	0.2548	0.0097	8.8816	0.0438	0.0106	0.0015	0.0168	0.0031	0.0083	0.0017	0.013	0.0015	< LOD	0.0006	< LOD	0.0007	0.0015	0.0007
5188	09-24-2018 15:10	NAM-MS2	sample	GeoChem	GeoChem Trace	DualSoil	DualSoil	120	Passed	5.5075	1.0554	4.9219	0.2724	61.1998	0.5585	0.0733	0.0376	< LOD	0.0116	0.2813	0.0195	0.5515	0.0141	7.1514	0.0396	2.1433	0.0155	0.017	0.003	0.0504	0.0033	0.2591	0.0098	8.9407	0.044	0.0103	0.0016	0.0182	0.0031	0.0081	0.0017	0.0122	0.0015	< LOD	0.0006	< LOD	0.0007	0.0019	0.0007
5189	09-24-2018 15:13	NAM-MS2	sample	GeoChem	GeoChem Trace	DualSoil	DualSoil	120	Passed	5.3971	1.1151	4.8914	0.2754	61.5538	0.561	0.0576	0.0381	< LOD	0.0119	0.2639	0.0195	0.5431	0.0141	7.1628	0.0397	2.142	0.0155	0.0166	0.003	0.043	0.0032	0.2555	0.0097	8.87	0.0438	0.0113	0.0016	0.0153	0.0031	0.0081	0.0017	0.0125	0.0015	< LOD	0.0006	< LOD	0.0007	0.0021	0.0007
5190	09-24-2018 15:16	NAM-MS2	sample	GeoChem	GeoChem Trace	DualSoil	DualSoil	120	Passed	4.9012	1.1052	4.8813	0.2754	62.0025	0.5639	0.0549	0.0385	< LOD	0.0119	0.2677	0.0197	0.5404	0.0142	7.2278	0.0399	2.1723	0.0156	0.0149	0.003	0.0443	0.0033	0.2601	0.0098	8.8851	0.0439	0.0104	0.0015	0.0185	0.0032	0.0093	0.0018	0.0131	0.0015	< LOD	0.0007	< LOD	0.0007	0.0024	0.0007
5191	09-24-2018 15:39	NAM-MS15	sample	GeoChem	GeoChem Trace	DualSoil	DualSoil	121	Passed	1.4806	0.8796	8.6653	0.3193	65.1889	0.5689	0.5777	0.0412	< LOD	0.0127	0.291	0.019	0.9023	0.0166	3.8936	0.0293	1.3066	0.0113	0.0035	0.0022	< LOD	0.0024	0.572	0.0136	7.5953	0.0385	0.0051	0.0008	0.0069	0.0024	0.0053	0.0013	0.0332	0.0019	< LOD	0.0006	< LOD	0.0006	0.0033	0.0006
5192	09-24-2018 15:42	NAM-MS15	sample	GeoChem	GeoChem Trace	DualSoil	DualSoil	120	Passed	1.6674	0.877	8.8326	0.3243	65.3019	0.5742	0.5708	0.0413	< LOD	0.0127	0.2824	0.0193	0.8895	0.0166	3.8924	0.0295	1.2969	0.0113	0.0028	0.0022	< LOD	0.0024	0.5766	0.0137	7.5942	0.0385	0.0046	0.0008	0.0063	0.0024	0.007	0.0014	0.0341	0.0019	< LOD	0.0006	< LOD	0.0006	0.0024	0.0007
5193	09-24-2018 15:45	NAM-MS15	sample	GeoChem	GeoChem Trace	DualSoil	DualSoil	121	Passed	0.966	0.8619	8.8082	0.3213	65.5235	0.5707	0.5806	0.041	< LOD	0.0126	0.2898	0.0191	0.9043	0.0165	3.8804	0.0292	1.2792	0.0111	0.0049	0.0022	< LOD	0.0024	0.5803	0.0137	7.6604	0.0387	0.0047	0.0008	0.0069	0.0024	0.0056	0.0013	0.031	0.0018	< LOD	0.0006	< LOD	0.0006	0.0025	0.0006
5194	09-24-2018 15:47	NAM-MS15	sample	GeoChem	GeoChem Trace	DualSoil	DualSoil	120	Passed	1.0132	0.8466	9.0669	0.3269	65.9416	0.5776	0.5919	0.0415	< LOD	0.0127	0.2785	0.0193	0.9057	0.0167	3.8953	0.0295	1.2906	0.0112	0.0039	0.0022	< LOD	0.0024	0.5709	0.0136	7.6088	0.0386	0.0047	0.0007	0.0072	0.0024	0.0054	0.0013	0.0309	0.0018	< LOD	0.0006	< LOD	0.0006	0.0025	0.0006
5195	09-24-2018 15:50	NAM-MS15	sample	GeoChem	GeoChem Trace	DualSoil	DualSoil	120	Passed	1.4845	0.831	8.9629	0.3243	65.1854	0.5733	0.5903	0.0416	< LOD	0.0128	0.2863	0.0191	0.9076	0.0166	3.8439	0.0293	1.2869	0.0112	0.0047	0.0022	< LOD	0.0024	0.5753	0.0136	7.6312	0.0386	0.005	0.0008	0.0078	0.0024	0.0057	0.0013	0.0338	0.0019	< LOD	0.0006	< LOD	0.0006	0.0025	0.0006
5196	09-24-2018 15:53	NAM-MS22	sample	GeoChem	GeoChem Trace	DualSoil	DualSoil	121	Passed	0.8258	0.7222	6.3136	0.2727	76.6151	0.6184	0.3024	0.0296	< LOD	0.0105	0.141	0.0164	1.2891	0.0183	2.2526	0.0221	0.2764	0.0055	0.0022	0.0011	0.0089	0.0018	0.2719	0.0095	4.0562	0.0273	0	0	0.0022	0.0017	0.0044	0.0009	0.0121	0.0011	< LOD	0.0005	< LOD	0.0005	0.0044	0.0006
5197	09-24-2018 15:56	NAM-MS22	sample	GeoChem	GeoChem Trace	DualSoil	DualSoil	120	Passed	0.9285	0.7248	6.6884	0.2803	76.4796	0.6228	0.3237	0.0301	< LOD	0.0105	0.1425	0.0166	1.2961	0.0185	2.2315	0.0222	0.3007	0.0056	0.0032	0.0011	0.0086	0.0018	0.278	0.0096	4.1042	0.0275	0	0	0.0029	0.0017	0.0048	0.0009	0.0125	0.0011	< LOD	0.0005	< LOD	0.0005	0.0043	0.0006
5198	09-24-2018 15:58	NAM-MS22	sample	GeoChem	GeoChem Trace	DualSoil	DualSoil	120	Passed	1.0704	0.7241	6.5779	0.278	76.8767	0.6253	0.3203	0.0301	< LOD	0.0105	0.1334	0.0167	1.2872	0.0185	2.2209	0.0221	0.2807	0.0055	0.0021	0.0011	0.0076	0.0018	0.2713	0.0095	4.1242	0.0275	0	0	0.0028	0.0017	0.0048	0.0009	0.0125	0.0011	< LOD	0.0005	< LOD	0.0005	0.0047	0.0006
5199	09-24-2018 16:01	NAM-MS22	sample	GeoChem	GeoChem Trace	DualSoil	DualSoil	121	Passed	0.9206	0.7034	6.6516	0.277	76.8269	0.6198	0.3374	0.0301	< LOD	0.0103	0.1339	0.0166	1.2986	0.0184	2.2579	0.0221	0.2841	0.0054	0.0025	0.0011	0.0076	0.0018	0.276	0.0096	4.0747	0.0274	0	0	0.0026	0.0017	0.0045	0.0009	0.0118	0.0011	0.0005	0.0005	< LOD	0.0005	0.0044	0.0006
5200	09-24-2018 16:03	NAM-MS22	sample	GeoChem	GeoChem Trace	DualSoil	DualSoil	121	Passed	< LOD	0.7167	6.6411	0.2773	76.658	0.6191	0.3232	0.0297	< LOD	0.0104	0.1527	0.0164	1.2787	0.0182	2.2621	0.0221	0.2621	0.0053	0.0037	0.0011	0.0091	0.0018	0.2737	0.0095	4.163	0.0277	0	0	0.0023	0.0017	0.0044	0.0009	0.0131	0.0011	< LOD	0.0005	< LOD	0.0005	0.0041	0.0006
5201	09-24-2018 16:07	CRM3	CRM	GeoChem	GeoChem Trace	DualSoil	DualSoil	120	Passed	< LOD	0.6926	15.3288	0.3689	66.4698	0.5488	0.0439	0.0181	< LOD	0.0105	< LOD	0.0138	3.3955	0.0277	0.4987	0.0122	< LOD	0.0024	< LOD	0.0012	0.0214	0.0017	0.13	0.0067	0.3268	0.0079	0	0	< LOD	0.0011	0.0017	0.0006	0.0093	0.0008	< LOD	0.0005	< LOD	0.0004	0.2374	0.0019
5202	09-24-2018 16:10	CRM3	CRM	GeoChem	GeoChem Trace	DualSoil	DualSoil	120	Passed	< LOD	0.6716	15.6152	0.3709	66.6776	0.5496	0.042	0.018	< LOD	0.0105	< LOD	0.0139	3.3444	0.0276	0.4898	0.0122	< LOD	0.0024	< LOD	0.0012	0.0211	0.0017	0.1254	0.0066	0.3268	0.0078	0	0	< LOD	0.0011	0.0021	0.0006	0.0089	0.0007	< LOD	0.0005	< LOD	0.0004	0.2393	0.0019
5203	09-24-2018 16:12	CRM3	CRM	GeoChem	GeoChem Trace	DualSoil	DualSoil	121	Passed	< LOD	0.6964	15.4971	0.3678	67.2362	0.548	0.0387	0.0183	< LOD	0.0103	< LOD	0.0138	3.2852	0.0271	0.5018	0.0121	< LOD	0.0023	< LOD	0.0012	0.0233	0.0017	0.1265	0.0066	0.3184	0.0078	0	0	< LOD	0.001	0.0024	0.0006	0.0088	0.0008	< LOD	0.0005	< LOD	0.0003	0.2364	0.0019
5204	09-24-2018 16:15	CRM3	CRM	GeoChem	GeoChem Trace	DualSoil	DualSoil	121	Passed	< LOD	0.6809	15.4555	0.3666	67.0324	0.5468	0.0403	0.0172	< LOD	0.0102	< LOD	0.0137	3.3233	0.0272	0.4933	0.012	< LOD	0.0023	< LOD	0.0012	0.0198	0.0016	0.1253	0.0066	0.3177	0.0077	0	0	< LOD	0.0011	0.002	0.0006	0.0091	0.0008	< LOD	0.0005	< LOD	0.0004	0.2411	0.0019
5205	09-24-2018 16:18	CRM3	CRM	GeoChem	GeoChem Trace	DualSoil	DualSoil	120	Passed	< LOD	0.6912	15.4359	0.3697	67.1438	0.5521	0.0375	0.0175	< LOD	0.0103	< LOD	0.014	3.3223	0.0275	0.4863	0.0121	< LOD	0.0023	< LOD	0.0012	0.0219	0.0017	0.1276	0.0067	0.3278	0.0079	0	0	< LOD	0.0011	0.0018	0.0006	0.0088	0.0008	< LOD	0.0005	< LOD	0.0004	0.2381	0.0019
5206	09-24-2018 16:21	NAM-MS29	cal sample	GeoChem	GeoChem Trace	DualSoil	DualSoil	120	Passed	< LOD	0.6289	5.5133	0.2556	85.967	0.6704	0.1559	0.0227	< LOD	0.0092	0.0736	0.0158	1.6464	0.02	1.168	0.0164	0.14	0.004	0.0013	0.0006	0.007	0.0015	0.0652	0.0051	1.2852	0.0152	0	0	< LOD	0.0014	0.0041	0.0008	0.0051	0.0007	< LOD	0.0005	< LOD	0.0005	0.0059	0.0005
5207	09-24-2018 16:23	NAM-MS29	cal sample	GeoChem	GeoChem Trace	DualSoil	DualSoil	121	Passed	< LOD	0.6353	5.659	0.2564	85.5738	0.6628	0.1633	0.0231	< LOD	0.009	0.0792	0.0158	1.6943	0.0202	1.1911	0.0164	0.1486	0.004	0.0011	0.0006	0.0072	0.0015	0.0616	0.005	1.331	0.0155	0	0	< LOD	0.0013	0.004	0.0008	0.0058	0.0008	< LOD	0.0005	< LOD	0.0005	0.0056	0.0005
5208	09-24-2018 16:26	NAM-MS29	cal sample	GeoChem	GeoChem Trace	DualSoil	DualSoil	120	Passed	< LOD	0.6259	5.7383	0.2587	85.9557	0.6705	0.1438	0.0228	< LOD	0.0091	0.0726	0.0159	1.6667	0.0202	1.1703	0.0165	0.1341	0.0039	0.001	0.0006	0.0074	0.0015	0.0636	0.0051	1.2887	0.0153	0	0	< LOD	0.0013	0.0037	0.0008	0.0054	0.0007	< LOD	0.0005	< LOD	0.0005	0.0058	0.0005
5209	09-24-2018 16:28	NAM-MS29	cal sample	GeoChem	GeoChem Trace	DualSoil	DualSoil	120	Passed	< LOD	0.6457	5.7829	0.2604	86.0405	0.671	0.1472	0.023	< LOD	0.0092	0.0643	0.0156	1.6505	0.0201	1.1816	0.0165	0.1411	0.004	0.0007	0.0006	0.007	0.0015	0.0643	0.0051	1.2816	0.0152	0	0	< LOD	0.0013	0.0042	0.0008	0.0054	0.0007	< LOD	0.0005	< LOD	0.0005	0.0057	0.0005
5210	09-24-2018 16:31	NAM-MS29	cal sample	GeoChem	GeoChem Trace	DualSoil	DualSoil	120	Passed	< LOD	0.6495	5.9096	0.2625	86.0732	0.6715	0.1437	0.0227	< LOD	0.0092	0.0642	0.0158	1.6689	0.0202	1.1892	0.0166	0.1397	0.004	< LOD	0.0006	0.0071	0.0015	0.0615	0.0051	1.3368	0.0156	0	0	< LOD	0.0013	0.0042	0.0008	0.0053	0.0007	< LOD	0.0005	< LOD	0.0005	0.0059	0.0005
5211	09-24-2018 16:34	NAM-MS28	sample	GeoChem	GeoChem Trace	DualSoil	DualSoil	120	Passed	0.7871	0.6554	5.6376	0.2592	82.0399	0.6503	0.1997	0.0255	< LOD	0.0097	0.0581	0.0155	1.2692	0.0181	1.5588	0.0187	0.2502	0.005	0.0017	0.0008	0.0091	0.0016	0.144	0.0071	2.6075	0.0217	0	0	< LOD	0.0015	0.004	0.0009	0.0076	0.0009	< LOD	0.0005	< LOD	0.0005	0.0046	0.0005
5212	09-24-2018 16:36	NAM-MS28	sample	GeoChem	GeoChem Trace	DualSoil	DualSoil	121	Passed	0.8102	0.6503	5.5132	0.2557	81.8438	0.644	0.1868	0.025	< LOD	0.0095	0.0571	0.0156	1.2817	0.018	1.5593	0.0186	0.2559	0.0051	0.0023	0.0008	0.0089	0.0016	0.1492	0.0072	2.7022	0.0221	0	0	0.0017	0.0015	0.0046	0.0009	0.0071	0.0009	< LOD	0.0005	< LOD	0.0005	0.0046	0.0005
5213	09-24-2018 16:39	NAM-MS28	sample	GeoChem	GeoChem Trace	DualSoil	DualSoil	120	Passed	0.8709	0.6654	5.5811	0.2583	82.1138	0.6505	0.2011	0.0254	< LOD	0.0097	0.0608	0.0156	1.2564	0.018	1.5686	0.0187	0.2481	0.005	0.0022	0.0008	0.0076	0.0016	0.1476	0.0071	2.6001	0.0217	0	0	< LOD	0.0015	0.0044	0.0009	0.0074	0.0009	< LOD	0.0005	< LOD	0.0005	0.0045	0.0005
5214	09-24-2018 16:42	NAM-MS28	sample	GeoChem	GeoChem Trace	DualSoil	DualSoil	120	Passed	0.8194	0.6567	5.6814	0.26	81.7087	0.6482	0.1779	0.0252	< LOD	0.0098	0.0717	0.0156	1.276	0.0181	1.5608	0.0187	0.2497	0.005	0.0021	0.0008	0.0103	0.0016	0.1458	0.0072	2.6096	0.0217	0	0	< LOD	0.0015	0.0041	0.0009	0.0073	0.0009	< LOD	0.0005	< LOD	0.0005	0.0041	0.0005
5215	09-24-2018 16:44	NAM-MS28	sample	GeoChem	GeoChem Trace	DualSoil	DualSoil	120	Passed	0.8873	0.6559	5.7933	0.2616	81.8952	0.6497	0.1948	0.0253	< LOD	0.0097	0.0651	0.0156	1.2643	0.0181	1.5697	0.0188	0.2616	0.0051	0.0018	0.0008	0.0076	0.0016	0.1532	0.0073	2.6868	0.0221	0	0	< LOD	0.0016	0.0044	0.0009	0.0075	0.0009	< LOD	0.0005	< LOD	0.0005	0.005	0.0005
5216	09-24-2018 16:47	NAM-MS30	sample	GeoChem	GeoChem Trace	DualSoil	DualSoil	121	Passed	0.7184	0.6615	5.4136	0.2525	82.365	0.644	0.1749	0.0241	0.0128	0.0097	0.0878	0.0155	1.3964	0.0186	1.4915	0.0181	0.2362	0.0049	0.0012	0.0008	0.0072	0.0016	0.0925	0.0059	2.0327	0.0192	0	0	< LOD	0.0014	0.0035	0.0008	0.0057	0.0008	< LOD	0.0005	< LOD	0.0005	0.0049	0.0005
5217	09-24-2018 16:50	NAM-MS30	sample	GeoChem	GeoChem Trace	DualSoil	DualSoil	120	Passed	0.8452	0.6457	5.5425	0.2566	83.25	0.6554	0.1932	0.0252	< LOD	0.0096	0.0921	0.016	1.4038	0.0188	1.4881	0.0183	0.2296	0.0048	0.0018	0.0008	0.0073	0.0016	0.0909	0.0059	2.0356	0.0192	0	0	< LOD	0.0015	0.0041	0.0008	0.0056	0.0008	< LOD	0.0005	< LOD	0.0005	0.005	0.0005
5218	09-24-2018 16:53	NAM-MS30	sample	GeoChem	GeoChem Trace	DualSoil	DualSoil	120	Passed	0.7171	0.6887	5.5901	0.2587	83.5229	0.6573	0.1786	0.025	< LOD	0.0096	0.1069	0.0161	1.4162	0.0189	1.5045	0.0183	0.2398	0.0049	0.0018	0.0008	0.008	0.0016	0.0959	0.006	2.0984	0.0195	0	0	< LOD	0.0014	0.004	0.0008	0.0056	0.0008	< LOD	0.0005	< LOD	0.0005	0.0048	0.0005
5219	09-24-2018 16:56	NAM-MS30	sample	GeoChem	GeoChem Trace	DualSoil	DualSoil	120	Passed	0.9378	0.6593	5.6279	0.2573	83.3367	0.6559	0.1861	0.0248	< LOD	0.0095	0.1074	0.0161	1.3986	0.0188	1.5013	0.0183	0.2374	0.0049	0.0017	0.0008	0.0088	0.0016	0.0938	0.006	2.0542	0.0193	0	0	< LOD	0.0014	0.0037	0.0008	0.0054	0.0008	< LOD	0.0005	< LOD	0.0005	0.0047	0.0005
5220	09-24-2018 16:58	NAM-MS30	sample	GeoChem	GeoChem Trace	DualSoil	DualSoil	120	Passed	0.7425	0.6643	5.5154	0.2565	83.6496	0.6582	0.2018	0.0251	< LOD	0.0095	0.0951	0.0161	1.4126	0.0189	1.535	0.0185	0.2417	0.0049	0.0019	0.0008	0.0077	0.0016	0.098	0.006	2.052	0.0193	0	0	< LOD	0.0014	0.0039	0.0008	0.006	0.0008	0.0005	0.0005	< LOD	0.0005	0.0049	0.0005
5221	09-24-2018 17:16	CS-M2	cal std	GeoChem	GeoChem Trace	DualSoil	DualSoil	60	Passed	< LOD	1.0299	12.5423	0.4997	71.5972	0.8326	0.0524	0.031	0.1401	0.0198	< LOD	0.0213	4.789	0.0468	0.9465	0.0223	0.156	0.0058	< LOD	0.0017	0.0085	0.0023	0.0923	0.0087	1.5913	0.0243	0	0	< LOD	0.0019	0.0228	0.0019	0.0728	0.0029	0.006	0.0018	< LOD	0.0006	0.0137	0.0009
5222	09-24-2018 17:17	CS-M2	cal std	GeoChem	GeoChem Trace		DualSoil	60	Passed	< LOD	1.059	12.8442	0.5052	71.8479	0.8344	0.0581	0.0311	0.1346	0.0198	< LOD	0.0212	4.8104	0.0469	0.9309	0.0222	0.1551	0.0058	< LOD	0.0017	0.0074	0.0023	0.0913	0.0088	1.5752	0.0242	0	0	0.0023	0.002	0.0227	0.0019	0.0751	0.003	0.007	0.0018	< LOD	0.0006	0.0148	0.0009
5223	09-24-2018 17:19	CS-M2	cal std	GeoChem	GeoChem Trace	DualSoil	DualSoil	60	Passed	< LOD	1.0713	12.7091	0.5036	72.0891	0.8367	0.0807	0.0314	0.1326	0.0195	< LOD	0.0212	4.813	0.0469	0.9376	0.0222	0.1556	0.0058	< LOD	0.0017	0.0086	0.0023	0.0925	0.0089	1.5902	0.0243	0	0	0.0022	0.002	0.0235	0.002	0.0745	0.003	0.0071	0.0019	< LOD	0.0006	0.0152	0.001
5224	09-24-2018 17:20	CS-M2	cal std	GeoChem	GeoChem Trace	DualSoil	DualSoil	60	Passed	< LOD	1.0394	12.9567	0.506	72.145	0.8371	0.0642	0.0312	0.1439	0.0199	< LOD	0.0215	4.8088	0.0469	0.9494	0.0223	0.1575	0.0058	< LOD	0.0017	0.006	0.0023	0.0996	0.0089	1.6098	0.0245	0	0	0.0024	0.002	0.0225	0.0019	0.0728	0.0029	0.007	0.0018	< LOD	0.0006	0.0148	0.0009
5225	09-24-2018 17:22	CS-M2	cal std	GeoChem	GeoChem Trace	DualSoil	DualSoil	60	Passed	< LOD	1.0451	12.6161	0.5019	71.7639	0.8343	0.0826	0.0317	0.1377	0.0197	< LOD	0.0216	4.8433	0.047	0.9419	0.0222	0.1581	0.0058	0.0019	0.0017	0.0097	0.0023	0.0989	0.009	1.6048	0.0244	0	0	0.0021	0.002	0.0233	0.0019	0.0724	0.0029	0.0064	0.0018	< LOD	0.0006	0.0145	0.0009
5226	09-24-2018 17:23	CS-M2	cal std	GeoChem	GeoChem Trace	DualSoil	DualSoil	60	Passed	< LOD	1.0746	12.6762	0.5037	71.9503	0.8354	0.0567	0.0318	0.1238	0.0198	< LOD	0.0217	4.8228	0.0469	0.9385	0.0222	0.1533	0.0058	< LOD	0.0017	0.0073	0.0024	0.0927	0.0085	1.6187	0.0245	0	0	< LOD	0.0019	0.0226	0.0019	0.0719	0.0029	0.0072	0.0018	< LOD	0.0006	0.0137	0.0009
5227	09-24-2018 17:25	CS-M2	cal std	GeoChem	GeoChem Trace	DualSoil	DualSoil	60	Passed	< LOD	1.0557	12.8997	0.5059	71.5463	0.8323	0.0716	0.0314	0.1359	0.0197	< LOD	0.0215	4.8462	0.047	0.9521	0.0223	0.1557	0.0058	< LOD	0.0017	0.0079	0.0024	0.0887	0.0086	1.5898	0.0243	0	0	< LOD	0.002	0.0231	0.0019	0.0736	0.0029	0.0073	0.0018	< LOD	0.0006	0.0144	0.0009
5228	09-24-2018 17:26	CS-M2	cal std	GeoChem	GeoChem Trace	DualSoil	DualSoil	60	Passed	< LOD	1.0858	12.3629	0.4993	72.1743	0.8376	0.0497	0.0305	0.1414	0.0198	0.0254	0.0217	4.8386	0.047	0.9451	0.0223	0.1543	0.0059	< LOD	0.0017	0.0053	0.0023	0.0926	0.0088	1.6099	0.0245	0	0	< LOD	0.002	0.0222	0.0019	0.073	0.0029	0.0044	0.0018	< LOD	0.0006	0.0144	0.0009
5229	09-24-2018 17:28	CS-M2	cal std	GeoChem	GeoChem Trace	DualSoil	DualSoil	61	Passed	< LOD	1.0131	12.9249	0.4977	72.2962	0.8247	0.0635	0.0307	0.1286	0.019	< LOD	0.0214	4.8202	0.0461	0.934	0.0218	0.1547	0.0057	< LOD	0.0016	0.0066	0.0023	0.093	0.0088	1.6163	0.0245	0	0	0.002	0.0019	0.0236	0.002	0.0728	0.0029	0.0066	0.0018	< LOD	0.0006	0.0147	0.0009
5230	09-24-2018 17:29	CS-M2	cal std	GeoChem	GeoChem Trace	DualSoil	DualSoil	60	Passed	< LOD	1.1034	12.737	0.5039	72.1821	0.8371	0.0649	0.031	0.1509	0.02	< LOD	0.0214	4.8343	0.0469	0.941	0.0222	0.1532	0.0058	0.0017	0.0017	0.0079	0.0023	0.0946	0.0088	1.5851	0.0243	0	0	< LOD	0.0019	0.0229	0.0019	0.0725	0.0029	0.0068	0.0018	< LOD	0.0006	0.0142	0.0009
5231	09-24-2018 17:31	CS-M2	cal std	GeoChem	GeoChem Trace			60.1	Passed	< LOD	1.0577	12.7269	0.5027	71.9592	0.8342	0.0644	0.0312	0.1369	0.0197	< LOD	0.0215	4.8227	0.0468	0.9417	0.0222	0.1553	0.0058	< LOD	0.0017	0.0075	0.0023	0.0936	0.0088	1.5991	0.0244	0	0	< LOD	0.002	0.0229	0.0019	0.0731	0.0029	0.0066	0.0018	< LOD	0.0006	0.0144	0.0009
5232	09-25-2018 09:02	CS-M2	cal std	GeoChem	GeoChem Trace	DualSoil	DualSoil	60	Passed	< LOD	1.0449	11.8139	0.49	70.1427	0.8221	0.0686	0.0316	0.117	0.0196	< LOD	0.0208	4.8101	0.0469	0.934	0.0222	0.1573	0.0059	0.0021	0.0018	0.0076	0.0023	0.0932	0.0089	1.6135	0.0245	0	0	< LOD	0.0019	0.0233	0.0019	0.0734	0.0029	0.0073	0.0018	< LOD	0.0006	0.0145	0.0009
5233	09-25-2018 09:04	CS-M2	cal std	GeoChem	GeoChem Trace	DualSoil	DualSoil	60	Passed	< LOD	1.0699	12.0064	0.4932	70.0073	0.821	0.0624	0.0312	0.1366	0.02	< LOD	0.0206	4.8111	0.0469	0.9507	0.0223	0.1599	0.006	< LOD	0.0018	0.008	0.0024	0.1004	0.0089	1.623	0.0246	0	0	< LOD	0.0019	0.0215	0.0018	0.0698	0.0028	0.0073	0.0018	< LOD	0.0005	0.0142	0.0009
5234	09-25-2018 09:05	CS-M2	cal std	GeoChem	GeoChem Trace	DualSoil	DualSoil	60	Passed	< LOD	1.0413	12.1311	0.4943	70.3458	0.8236	0.0638	0.0301	0.1417	0.0198	< LOD	0.0208	4.7879	0.0468	0.9472	0.0224	0.157	0.006	< LOD	0.0018	0.0069	0.0024	0.0943	0.0087	1.6192	0.0246	0	0	0.0031	0.002	0.0217	0.0018	0.0713	0.0028	0.0074	0.0018	< LOD	0.0006	0.0137	0.0009
5235	09-25-2018 09:07	CS-M2	cal std	GeoChem	GeoChem Trace	DualSoil	DualSoil	60	Passed	< LOD	1.0515	12.3018	0.4967	70.3504	0.8233	0.0549	0.0304	0.1253	0.0194	< LOD	0.021	4.8107	0.0469	0.9329	0.0222	0.1578	0.0059	< LOD	0.0018	0.0081	0.0023	0.0921	0.0088	1.6071	0.0245	0	0	0.0022	0.002	0.0228	0.0019	0.0736	0.0029	0.0075	0.0018	< LOD	0.0006	0.0144	0.0009
5236	09-25-2018 09:09	CS-M2	cal std	GeoChem	GeoChem Trace	DualSoil	DualSoil	61	Passed	1.0872	0.9981	12.0632	0.485	70.6772	0.8132	0.0558	0.0312	0.1116	0.0191	< LOD	0.0206	4.8238	0.0462	0.9468	0.022	0.1559	0.0058	< LOD	0.0017	0.0084	0.0023	0.0966	0.0089	1.611	0.0245	0	0	0.0021	0.002	0.0236	0.0019	0.0741	0.0029	0.0055	0.0018	< LOD	0.0006	0.0146	0.0009
5237	09-25-2018 09:11	CS-M2	cal std	GeoChem	GeoChem Trace	DualSoil	DualSoil	60	Passed	< LOD	1.0386	11.7534	0.4883	70.6064	0.8257	0.079	0.0307	0.1337	0.0195	< LOD	0.0208	4.7895	0.0468	0.9413	0.0223	0.1572	0.006	< LOD	0.0018	0.0068	0.0024	0.0908	0.0087	1.6109	0.0245	0	0	< LOD	0.002	0.0219	0.0019	0.072	0.0029	0.0077	0.0018	< LOD	0.0006	0.0144	0.0009
5238	09-25-2018 09:12	CS-M2	cal std	GeoChem	GeoChem Trace	DualSoil	DualSoil	60	Passed	< LOD	1.0565	11.8866	0.4919	70.5361	0.8252	0.0468	0.031	0.1217	0.0198	< LOD	0.0209	4.7876	0.0468	0.9419	0.0223	0.1565	0.006	< LOD	0.0018	0.0064	0.0023	0.0968	0.0089	1.6054	0.0245	0	0	< LOD	0.0019	0.0222	0.0019	0.0705	0.0028	0.006	0.0018	< LOD	0.0006	0.0143	0.0009
5239	09-25-2018 09:14	CS-M2	cal std	GeoChem	GeoChem Trace	DualSoil	DualSoil	60	Passed	< LOD	0.9876	12.3286	0.4957	70.5088	0.8244	0.0751	0.031	0.1278	0.0195	< LOD	0.0209	4.8401	0.047	0.933	0.0222	0.1563	0.0059	< LOD	0.0018	0.0082	0.0023	0.0978	0.0089	1.5934	0.0244	0	0	0.0029	0.002	0.0228	0.0019	0.075	0.0029	0.0066	0.0018	< LOD	0.0006	0.0141	0.0009
5240	09-25-2018 09:15	CS-M2	cal std	GeoChem	GeoChem Trace		DualSoil	60	Passed	< LOD	0.9801	12.196	0.4947	70.2308	0.8228	0.0795	0.0319	0.1339	0.0198	< LOD	0.0209	4.8573	0.0471	0.9384	0.0223	0.1639	0.006	< LOD	0.0018	0.0099	0.0024	0.097	0.0088	1.6201	0.0245	0	0	0.003	0.002	0.0234	0.0019	0.0744	0.0029	0.0074	0.0018	< LOD	0.0006	0.0143	0.0009
5241	09-25-2018 09:17	CS-M2	cal std	GeoChem	GeoChem Trace	DualSoil	DualSoil	60	Passed	< LOD	1.0233	11.9968	0.4921	70.8463	0.8279	0.0546	0.0306	0.1251	0.0196	< LOD	0.021	4.8476	0.0471	0.9487	0.0224	0.1607	0.006	< LOD	0.0018	0.0076	0.0023	0.0965	0.0089	1.6157	0.0246	0	0	0.0024	0.0019	0.0224	0.0019	0.0733	0.0029	0.0073	0.0018	< LOD	0.0006	0.0141	0.0009
5242	09-25-2018 09:18	CS-M2	cal std	GeoChem	GeoChem Trace	DualSoil	DualSoil	60	Passed	< LOD	1.0588	11.9068	0.4915	70.6367	0.8263	0.0581	0.0312	0.1188	0.0195	< LOD	0.0209	4.8337	0.047	0.945	0.0223	0.1583	0.0059	< LOD	0.0018	0.0068	0.0024	0.0971	0.0088	1.6192	0.0246	0	0	0.0028	0.002	0.022	0.0019	0.0733	0.0029	0.0077	0.0018	< LOD	0.0006	0.0146	0.0009
5243	09-25-2018 09:20	CS-M2	cal std	GeoChem	GeoChem Trace	DualSoil	DualSoil	60	Passed	< LOD	1.0688	12.2806	0.497	70.4408	0.8245	0.0711	0.0308	0.1319	0.0196	< LOD	0.0208	4.7906	0.0468	0.9528	0.0224	0.1598	0.006	0.0019	0.0018	0.0081	0.0024	0.1	0.0089	1.6166	0.0245	0	0	< LOD	0.0019	0.0222	0.0019	0.0724	0.0029	0.007	0.0018	< LOD	0.0006	0.0145	0.0009
5244	09-25-2018 09:21	CS-M2	cal std	GeoChem	GeoChem Trace	DualSoil	DualSoil	60	Passed	< LOD	1.1064	11.9689	0.4938	70.6895	0.827	0.0735	0.0317	0.1373	0.0198	< LOD	0.021	4.8399	0.0471	0.9529	0.0224	0.1618	0.006	< LOD	0.0018	0.007	0.0024	0.0924	0.0087	1.6022	0.0244	0	0	< LOD	0.0019	0.0215	0.0018	0.07	0.0028	0.0066	0.0017	< LOD	0.0005	0.0138	0.0009
5245	09-25-2018 09:23	CS-M2	cal std	GeoChem	GeoChem Trace	DualSoil	DualSoil	60	Passed	< LOD	1.0762	12.1687	0.4962	70.735	0.8269	0.0622	0.0312	0.1327	0.0198	< LOD	0.021	4.8761	0.0472	0.9469	0.0223	0.1609	0.0059	< LOD	0.0017	0.0089	0.0023	0.0971	0.0088	1.5898	0.0244	0	0	0.0026	0.002	0.022	0.0019	0.0732	0.0029	0.0073	0.0018	< LOD	0.0006	0.0144	0.0009
5246	09-25-2018 09:24	CS-M2	cal std	GeoChem	GeoChem Trace	DualSoil	DualSoil	60	Passed	< LOD	1.0366	12.0072	0.4912	70.9404	0.8284	0.0658	0.0305	0.1357	0.0198	< LOD	0.021	4.826	0.047	0.9372	0.0223	0.1581	0.006	< LOD	0.0017	0.0076	0.0024	0.0945	0.0088	1.612	0.0245	0	0	< LOD	0.002	0.0222	0.0019	0.073	0.0029	0.0064	0.0018	< LOD	0.0006	0.0147	0.0009
5247	09-25-2018 09:26	CS-M2	cal std	GeoChem	GeoChem Trace			60	Passed	< LOD	1.0433	12.0494	0.4933	70.6171	0.8259	0.0666	0.0311	0.1298	0.0197	< LOD	0.0209	4.8288	0.047	0.9438	0.0223	0.1594	0.006	< LOD	0.0018	0.0077	0.0024	0.096	0.0088	1.6085	0.0245	0	0	0.0022	0.002	0.0223	0.0019	0.0727	0.0029	0.007	0.0018	< LOD	0.0006	0.0143	0.0009
5248	09-25-2018 09:28	MB060	qtz blank	GeoChem	GeoChem Trace	DualSoil	DualSoil	60	Passed	< LOD	0.7691	< LOD	0.1564	85.651	0.9247	0.0563	0.018	< LOD	0.0112	< LOD	0.0167	< LOD	0.0067	< LOD	0.0068	< LOD	0.003	< LOD	0.0007	0.0048	0.0018	< LOD	0.0032	0.0282	0.0035	0	0	< LOD	0.0014	0.002	0.0007	0.0013	0.0006	< LOD	0.0005	< LOD	0.0004	< LOD	0.0005
5249	09-25-2018 09:29	MB060	qtz blank	GeoChem	GeoChem Trace	DualSoil	DualSoil	60	Passed	< LOD	0.8165	< LOD	0.1552	85.3433	0.9221	0.0558	0.018	0.0122	0.0116	< LOD	0.0165	< LOD	0.0066	< LOD	0.0067	< LOD	0.0033	< LOD	0.0007	0.008	0.0019	< LOD	0.0033	0.0269	0.0035	0	0	< LOD	0.0015	0.0022	0.0007	0.001	0.0005	< LOD	0.0005	< LOD	0.0004	< LOD	0.0005
5250	09-25-2018 09:31	MB060	qtz blank	GeoChem	GeoChem Trace	DualSoil	DualSoil	60	Passed	0.8361	0.7592	< LOD	0.1552	85.9695	0.9279	0.0563	0.0169	< LOD	0.0105	< LOD	0.0168	< LOD	0.0065	< LOD	0.0064	0.0037	0.0033	0.0007	0.0007	0.0096	0.0018	< LOD	0.0032	0.0266	0.0034	0	0	< LOD	0.0014	0.0023	0.0007	0.0009	0.0006	< LOD	0.0005	< LOD	0.0004	< LOD	0.0005
5251	09-25-2018 09:32	MB060	qtz blank	GeoChem	GeoChem Trace	DualSoil	DualSoil	60	Passed	1.0413	0.7529	< LOD	0.1502	85.8412	0.9265	0.0558	0.0174	< LOD	0.011	< LOD	0.0166	< LOD	0.0065	< LOD	0.0067	< LOD	0.0033	0.0012	0.0007	0.008	0.0018	< LOD	0.0032	0.0265	0.0035	0	0	< LOD	0.0014	0.0027	0.0007	0.0012	0.0006	< LOD	0.0005	< LOD	0.0004	< LOD	0.0005
5252	09-25-2018 09:34	MB060	qtz blank	GeoChem	GeoChem Trace	DualSoil	DualSoil	60	Passed	1.1036	0.7817	< LOD	0.1601	85.5534	0.9239	0.056	0.0166	< LOD	0.0105	< LOD	0.0169	< LOD	0.0067	< LOD	0.006	< LOD	0.0029	0.0012	0.0007	0.0082	0.0018	< LOD	0.0033	0.0275	0.0035	0	0	< LOD	0.0014	0.0023	0.0007	0.001	0.0006	< LOD	0.0005	< LOD	0.0004	< LOD	0.0005
5253	09-25-2018 09:36	CRM3/CGL002	CRM	GeoChem	GeoChem Trace	DualSoil	DualSoil	60	Passed	< LOD	0.9511	15.1041	0.518	65.8114	0.7715	0.0416	0.0246	< LOD	0.0145	< LOD	0.0193	3.3667	0.0391	0.4757	0.017	< LOD	0.0035	< LOD	0.0016	0.0199	0.0024	0.1274	0.0094	0.3243	0.0111	< LOD	0	< LOD	0.0016	0.002	0.0009	0.0086	0.001	< LOD	0.0007	< LOD	0.0005	0.239	0.0026
5254	09-25-2018 09:38	CRM3/CGL002	CRM	GeoChem	GeoChem Trace	DualSoil	DualSoil	120	Passed	< LOD	0.6836	15.0224	0.3663	65.9374	0.5463	0.0335	0.0175	< LOD	0.0103	< LOD	0.0135	3.3872	0.0277	0.4867	0.0121	< LOD	0.0024	< LOD	0.0012	0.0206	0.0017	0.1268	0.0066	0.3277	0.0079	< LOD	0	< LOD	0.0011	0.0017	0.0006	0.0093	0.0008	< LOD	0.0005	< LOD	0.0003	0.2376	0.0019
5255	09-25-2018 09:41	CRM3/CGL002	CRM	GeoChem	GeoChem Trace	DualSoil	DualSoil	120	Passed	< LOD	0.682	15.14	0.3669	65.9241	0.5462	0.0425	0.0175	< LOD	0.0104	< LOD	0.0136	3.3776	0.0277	0.5039	0.0123	< LOD	0.0024	< LOD	0.0012	0.023	0.0017	0.1268	0.0067	0.3375	0.008	< LOD	0	< LOD	0.0011	0.0017	0.0006	0.0088	0.0007	< LOD	0.0005	< LOD	0.0003	0.235	0.0018
5256	09-25-2018 09:43	CRM3/CGL002	CRM	GeoChem	GeoChem Trace	DualSoil	DualSoil	120	Passed	< LOD	0.6456	14.9425	0.3644	66.3574	0.5485	0.0429	0.0178	< LOD	0.0103	< LOD	0.0135	3.3144	0.0274	0.491	0.0121	0.0031	0.0024	0.0015	0.0012	0.025	0.0017	0.1257	0.0066	0.3184	0.0078	0	0	< LOD	0.0011	0.002	0.0006	0.0094	0.0008	< LOD	0.0005	< LOD	0.0004	0.2401	0.0019
5257	09-25-2018 09:46	CRM3/CGL002	CRM	GeoChem	GeoChem Trace	DualSoil	DualSoil	120	Passed	< LOD	0.666	15.327	0.3687	66.1329	0.5473	0.0404	0.018	< LOD	0.0104	< LOD	0.0136	3.308	0.0275	0.4921	0.0122	< LOD	0.0024	< LOD	0.0012	0.0223	0.0017	0.127	0.0066	0.3172	0.0078	0	0	< LOD	0.0011	0.0022	0.0006	0.0088	0.0007	< LOD	0.0005	< LOD	0.0004	0.2412	0.0019
5258	09-25-2018 09:48	CRM3/CGL002	CRM	GeoChem	GeoChem Trace	DualSoil	DualSoil	120	Passed	< LOD	0.6889	15.1672	0.3675	65.9781	0.5465	0.0345	0.0176	< LOD	0.0104	< LOD	0.0136	3.3365	0.0275	0.4862	0.0121	< LOD	0.0024	0.0013	0.0012	0.0232	0.0017	0.1276	0.0067	0.3276	0.0079	0	0	< LOD	0.0011	0.0019	0.0006	0.0089	0.0008	< LOD	0.0005	< LOD	0.0004	0.2403	0.0019
5259	09-25-2018 09:52	NAM-MS39	cal sample	GeoChem	GeoChem Trace	DualSoil	DualSoil	120	Passed	1.691	0.8306	7.4551	0.3059	68.5567	0.5949	0.3791	0.0368	< LOD	0.0125	0.2327	0.0189	0.8803	0.0165	2.902	0.0259	0.895	0.0095	0.0035	0.0018	0.0112	0.0026	0.6187	0.0141	8.6252	0.0405	0.0035	0.0005	0.0073	0.0025	0.0049	0.0013	0.0149	0.0014	< LOD	0.0006	< LOD	0.0006	0.0029	0.0007
5260	09-25-2018 09:54	NAM-MS39	cal sample	GeoChem	GeoChem Trace	DualSoil	DualSoil	120	Passed	1.1481	0.8218	7.6029	0.3092	68.6686	0.5957	0.4025	0.037	< LOD	0.0125	0.2276	0.0187	0.9222	0.0167	2.9037	0.0259	0.9051	0.0095	0.0063	0.0018	0.0108	0.0025	0.62	0.0141	8.5973	0.0405	0.0035	0.0005	0.0088	0.0026	0.005	0.0013	0.0146	0.0014	< LOD	0.0006	< LOD	0.0006	0.0027	0.0007
5261	09-25-2018 09:57	NAM-MS39	cal sample	GeoChem	GeoChem Trace	DualSoil	DualSoil	120	Passed	1.0892	0.8329	7.4658	0.3075	68.8801	0.597	0.4028	0.037	< LOD	0.0124	0.2141	0.0186	0.8813	0.0165	2.9203	0.026	0.8726	0.0094	0.0042	0.0018	0.0045	0.0025	0.6256	0.0141	8.7071	0.0407	0.003	0.0004	0.007	0.0024	0.0052	0.0013	0.0162	0.0014	< LOD	0.0006	< LOD	0.0006	0.0028	0.0006
5262	09-25-2018 09:59	NAM-MS39	cal sample	GeoChem	GeoChem Trace	DualSoil	DualSoil	120	Passed	1.3622	0.8224	7.4444	0.3071	68.9551	0.5978	0.3778	0.0373	< LOD	0.0126	0.2131	0.0189	0.9056	0.0167	2.944	0.0261	0.8794	0.0094	0.0062	0.0018	0.0062	0.0024	0.6259	0.0142	8.6549	0.0406	0.0028	0.0004	0.0082	0.0026	0.0056	0.0014	0.0152	0.0015	< LOD	0.0006	< LOD	0.0006	0.0029	0.0007
5263	09-25-2018 10:02	NAM-MS39	cal sample	GeoChem	GeoChem Trace	DualSoil	DualSoil	120	Passed	1.3881	0.8244	7.3062	0.3045	68.7737	0.5962	0.423	0.0376	< LOD	0.0124	0.2446	0.019	0.9126	0.0167	2.8765	0.0258	0.8771	0.0094	0.0031	0.0018	< LOD	0.0025	0.6352	0.0143	8.6166	0.0405	0.0036	0.0005	0.0077	0.0025	0.0049	0.0013	0.0154	0.0014	< LOD	0.0006	< LOD	0.0006	0.0027	0.0007
5264	09-25-2018 10:05	NAM-MS6	cal sample	GeoChem	GeoChem Trace	DualSoil	DualSoil	120	Passed	1.5676	1.077	7.2943	0.3537	22.5067	0.3519	< LOD	0.0435	< LOD	0.0198	0.0758	0.0169	0.1738	0.0126	1.7491	0.0242	7.7962	0.034	< LOD	0.0087	< LOD	0.0067	1.0104	0.0175	27.6901	0.0773	0.1708	0.0135	0.0411	0.0076	0.0121	0.0028	0.0231	0.0025	< LOD	0.0008	< LOD	0.0012	0.0046	0.0013
5265	09-25-2018 10:08	NAM-MS6	cal sample	GeoChem	GeoChem Trace	DualSoil	DualSoil	120	Passed	1.5744	1.0739	7.4515	0.3569	22.5824	0.3524	< LOD	0.0434	< LOD	0.0197	0.0775	0.017	0.172	0.0125	1.7419	0.0242	7.7438	0.0338	< LOD	0.0087	< LOD	0.0064	0.9966	0.0174	27.6808	0.0772	0.1684	0.0135	0.0372	0.0076	0.0098	0.0028	0.0242	0.0025	< LOD	0.0008	0.0014	0.0012	0.0044	0.0013
5266	09-25-2018 10:10	NAM-MS6	cal sample	GeoChem	GeoChem Trace	DualSoil	DualSoil	120	Passed	1.7086	1.0795	7.3147	0.3525	22.6363	0.3527	< LOD	0.0437	< LOD	0.0198	0.0729	0.017	0.1773	0.0127	1.7365	0.0241	7.7356	0.0338	< LOD	0.0086	< LOD	0.0065	1.0107	0.0175	27.5489	0.077	0.1808	0.0135	0.0343	0.0073	0.0108	0.0027	0.0242	0.0025	< LOD	0.0007	< LOD	0.0011	0.0048	0.0012
5267	09-25-2018 10:13	NAM-MS6	cal sample	GeoChem	GeoChem Trace	DualSoil	DualSoil	120	Passed	< LOD	1.0806	7.1379	0.3522	22.7221	0.3537	< LOD	0.0434	< LOD	0.0199	0.0712	0.0169	0.1683	0.0126	1.7307	0.0242	7.8957	0.0342	< LOD	0.0087	< LOD	0.0066	1.0046	0.0175	27.6782	0.0773	0.1719	0.0135	0.0347	0.0074	0.0074	0.0027	0.0214	0.0024	< LOD	0.0007	< LOD	0.0011	0.004	0.0012
5268	09-25-2018 10:16	NAM-MS6	cal sample	GeoChem	GeoChem Trace	DualSoil	DualSoil	120	Passed	2.3378	1.0854	7.4902	0.3564	23.019	0.3558	< LOD	0.0434	< LOD	0.0196	0.0644	0.0174	0.1669	0.0126	1.7411	0.0242	7.8192	0.034	< LOD	0.0086	< LOD	0.0064	1.0153	0.0176	27.6779	0.0773	0.1757	0.0133	0.0328	0.0074	0.0116	0.0028	0.023	0.0025	< LOD	0.0008	< LOD	0.0011	0.005	0.0013
5269	09-25-2018 10:18	NAM-MS33	sample	GeoChem	GeoChem Trace	DualSoil	DualSoil	120	Passed	1.7447	0.7998	6.4304	0.2811	70.196	0.5933	0.4522	0.0379	0.0326	0.0122	0.4679	0.0203	0.9996	0.0169	3.7313	0.0284	0.957	0.0096	0.0049	0.0017	0.0091	0.0021	0.3273	0.0105	5.1893	0.0318	0.0009	0.0002	0.0063	0.0021	0.0047	0.0012	0.0183	0.0014	< LOD	0.0006	< LOD	0.0006	0.003	0.0006
5270	09-25-2018 10:21	NAM-MS33	sample	GeoChem	GeoChem Trace	DualSoil	DualSoil	120	Passed	1.4353	0.8382	6.4694	0.2832	70.173	0.5935	0.4722	0.0387	0.0235	0.0124	0.4913	0.0205	1.0163	0.0171	3.7026	0.0284	0.9608	0.0097	0.0037	0.0018	0.0093	0.0021	0.3217	0.0104	5.2103	0.0319	0.0011	0.0002	0.0049	0.0021	0.0044	0.0012	0.0179	0.0014	< LOD	0.0006	< LOD	0.0006	0.0034	0.0006
5271	09-25-2018 10:24	NAM-MS33	sample	GeoChem	GeoChem Trace	DualSoil	DualSoil	120	Passed	1.5646	0.8125	6.5527	0.2838	69.8163	0.5917	0.4828	0.039	0.0186	0.0124	0.4776	0.0205	0.9935	0.0169	3.7167	0.0284	0.9581	0.0097	0.0036	0.0018	0.011	0.0022	0.336	0.0106	5.2817	0.0321	0.0012	0.0002	0.0067	0.0022	0.0051	0.0012	0.0176	0.0014	< LOD	0.0005	< LOD	0.0006	0.0036	0.0006
5272	09-25-2018 10:27	NAM-MS33	sample	GeoChem	GeoChem Trace	DualSoil	DualSoil	120	Passed	1.9602	0.8348	6.3054	0.2808	70.4886	0.5951	0.4663	0.039	0.024	0.0124	0.4663	0.0203	1.0049	0.017	3.6976	0.0283	0.9564	0.0096	0.0049	0.0017	0.0085	0.0021	0.3273	0.0105	5.1081	0.0316	0.0008	0.0001	0.0062	0.0021	0.0048	0.0012	0.0168	0.0014	< LOD	0.0006	< LOD	0.0006	0.0035	0.0006
5273	09-25-2018 10:29	NAM-MS33	sample	GeoChem	GeoChem Trace	DualSoil	DualSoil	120	Passed	1.6592	0.8223	6.3783	0.2818	70.6701	0.5965	0.4644	0.0385	0.0203	0.0122	0.4747	0.0204	0.9961	0.0169	3.7661	0.0286	0.9462	0.0096	0.0052	0.0017	0.0107	0.0021	0.3348	0.0106	5.1713	0.0318	0.0006	0.0001	0.0057	0.0021	0.0052	0.0012	0.0176	0.0014	< LOD	0.0005	< LOD	0.0006	0.0032	0.0006
5274	09-25-2018 10:32	NAM-MS42	sample	GeoChem	GeoChem Trace	DualSoil	DualSoil	120	Passed	1.071	0.7847	6.6779	0.2945	69.3379	0.6003	0.1908	0.0321	< LOD	0.0123	0.355	0.0201	1.0143	0.0176	1.8802	0.0215	1.126	0.0105	0.0045	0.0018	< LOD	0.0026	0.5265	0.013	9.3641	0.0418	0.0036	0.0004	0.008	0.0026	0.0059	0.0013	0.0127	0.0014	< LOD	0.0006	0.0007	0.0006	0.0031	0.0007
5275	09-25-2018 10:35	NAM-MS42	sample	GeoChem	GeoChem Trace	DualSoil	DualSoil	120	Passed	1.1772	0.7896	6.6615	0.2933	68.9336	0.5977	0.1825	0.0325	< LOD	0.0125	0.3442	0.0199	1.0055	0.0174	1.9078	0.0216	1.1076	0.0105	0.006	0.0018	0.0036	0.0025	0.5382	0.0132	9.2283	0.0415	0.0041	0.0005	0.0099	0.0028	0.0059	0.0015	0.0136	0.0015	< LOD	0.0006	0.0009	0.0007	0.0033	0.0007
5276	09-25-2018 10:37	NAM-MS42	sample	GeoChem	GeoChem Trace	DualSoil	DualSoil	120	Passed	1.0025	0.8068	6.6539	0.2955	69.2213	0.6	0.177	0.0324	< LOD	0.0125	0.343	0.0199	1.0202	0.0175	1.892	0.0215	1.1487	0.0106	0.0052	0.0018	< LOD	0.0025	0.5254	0.013	9.3787	0.0419	0.0038	0.0005	0.0083	0.0027	0.0064	0.0015	0.0124	0.0014	< LOD	0.0006	< LOD	0.0007	0.003	0.0007
5277	09-25-2018 10:40	NAM-MS42	sample	GeoChem	GeoChem Trace	DualSoil	DualSoil	120	Passed	1.1478	0.824	6.6779	0.2954	68.6725	0.5962	0.1852	0.0323	< LOD	0.0125	0.338	0.0197	1.0105	0.0175	1.8821	0.0215	1.1111	0.0105	0.0051	0.0018	< LOD	0.0026	0.505	0.0128	9.274	0.0416	0.0046	0.0005	0.0085	0.0028	0.0055	0.0015	0.0132	0.0015	< LOD	0.0006	< LOD	0.0007	0.0034	0.0007
5278	09-25-2018 10:42	NAM-MS42	sample	GeoChem	GeoChem Trace	DualSoil	DualSoil	120	Passed	0.9728	0.858	6.5724	0.296	69.2448	0.6003	0.1509	0.0324	< LOD	0.0127	0.3524	0.0202	0.9972	0.0174	1.9133	0.0217	1.1357	0.0106	0.0062	0.0018	< LOD	0.0025	0.5424	0.0132	9.4065	0.0419	0.0041	0.0005	0.0073	0.0028	0.005	0.0015	0.0142	0.0015	< LOD	0.0006	< LOD	0.0007	0.0035	0.0007
5279	09-25-2018 10:45	NAM-MS14	sample	GeoChem	GeoChem Trace	DualSoil	DualSoil	120	Passed	1.1652	0.7869	7.6035	0.3011	69.872	0.5954	0.379	0.0354	< LOD	0.0117	0.2578	0.0185	1.0144	0.0172	3.0694	0.0262	1.0045	0.0098	0.0038	0.0018	< LOD	0.0022	0.4725	0.0124	6.1239	0.0342	0.0013	0.0002	0.0057	0.0022	0.0047	0.0012	0.0254	0.0016	< LOD	0.0006	< LOD	0.0006	0.0034	0.0006
5280	09-25-2018 10:48	NAM-MS14	sample	GeoChem	GeoChem Trace	DualSoil	DualSoil	120	Passed	1.3364	0.7971	7.8687	0.3048	69.6798	0.5942	0.3873	0.0356	< LOD	0.0117	0.2551	0.0185	1.0183	0.0172	3.065	0.0262	1.0089	0.0098	0.0025	0.0018	< LOD	0.0022	0.477	0.0125	6.1249	0.0342	0.0012	0.0002	0.004	0.0022	0.0049	0.0012	0.0253	0.0016	< LOD	0.0006	< LOD	0.0006	0.0034	0.0006
5281	09-25-2018 10:50	NAM-MS14	sample	GeoChem	GeoChem Trace	DualSoil	DualSoil	120	Passed	1.304	0.7902	7.7605	0.3026	70.1624	0.597	0.3609	0.0349	< LOD	0.0118	0.2563	0.0186	1.0125	0.0172	3.018	0.026	0.9994	0.0098	0.0045	0.0018	0.0022	0.0022	0.4664	0.0123	6.1558	0.0343	0.0008	0.0001	0.005	0.0021	0.0057	0.0012	0.0263	0.0016	< LOD	0.0005	< LOD	0.0006	0.0031	0.0006
5282	09-25-2018 10:53	NAM-MS14	sample	GeoChem	GeoChem Trace	DualSoil	DualSoil	120	Passed	1.1838	0.7902	7.7009	0.3023	69.655	0.5941	0.3874	0.0356	< LOD	0.0119	0.2662	0.0187	1.0192	0.0172	3.0292	0.026	1.0041	0.0098	0.0049	0.0018	0.0022	0.0022	0.4724	0.0124	6.1071	0.0341	0.0014	0.0002	0.0069	0.0022	0.0046	0.0012	0.0266	0.0016	< LOD	0.0006	< LOD	0.0006	0.0034	0.0006
5283	09-25-2018 10:55	NAM-MS14	sample	GeoChem	GeoChem Trace	DualSoil	DualSoil	122	Passed	1.0572	0.7892	7.9194	0.3003	69.6325	0.5842	0.363	0.0347	< LOD	0.0118	0.2602	0.0182	1.0157	0.0169	3.0675	0.0257	0.9969	0.0096	0.004	0.0018	< LOD	0.0022	0.4745	0.0124	6.161	0.0343	0.0014	0.0002	0.005	0.0021	0.0055	0.0012	0.0257	0.0016	< LOD	0.0005	< LOD	0.0006	0.0033	0.0006
5284	09-25-2018 10:58	NAM-MS23	sample	GeoChem	GeoChem Trace	DualSoil	DualSoil	120	Passed	1.6813	0.9256	9.3893	0.3431	57.1059	0.5397	0.5195	0.0411	< LOD	0.0135	0.2533	0.0189	0.5741	0.0144	3.9886	0.0306	0.969	0.0105	0.0088	0.0025	< LOD	0.003	0.8307	0.0162	12.109	0.0486	0.0162	0.0025	0.0122	0.003	0.0069	0.0015	0.0278	0.0019	< LOD	0.0006	< LOD	0.0007	0.0022	0.0007
5285	09-25-2018 11:01	NAM-MS23	sample	GeoChem	GeoChem Trace	DualSoil	DualSoil	121	Passed	2.1715	0.9234	9.5005	0.3415	57.3751	0.537	0.5094	0.0407	< LOD	0.0134	0.2636	0.019	0.5827	0.0144	3.9961	0.0304	0.977	0.0104	0.008	0.0025	< LOD	0.003	0.8364	0.0162	12.1014	0.0486	0.0176	0.0025	0.0105	0.003	0.0067	0.0015	0.0267	0.0018	< LOD	0.0006	< LOD	0.0007	0.0025	0.0007
5286	09-25-2018 11:04	NAM-MS23	sample	GeoChem	GeoChem Trace	DualSoil	DualSoil	120	Passed	1.9514	0.9322	9.4927	0.3441	57.2437	0.5406	0.5208	0.0413	< LOD	0.0136	0.2586	0.0189	0.5742	0.0144	4.0161	0.0307	0.9895	0.0106	0.0092	0.0025	< LOD	0.003	0.8437	0.0163	12.1201	0.0486	0.017	0.0025	0.0126	0.0031	0.0056	0.0015	0.0294	0.0019	< LOD	0.0006	< LOD	0.0007	0.0021	0.0007
5287	09-25-2018 11:06	NAM-MS23	sample	GeoChem	GeoChem Trace	DualSoil	DualSoil	120	Passed	1.7838	0.9212	9.3588	0.3422	56.5955	0.5368	0.5139	0.0414	< LOD	0.0139	0.2416	0.0186	0.5736	0.0145	3.9513	0.0305	0.9701	0.0105	0.0086	0.0025	< LOD	0.003	0.8436	0.0163	12.0964	0.0485	0.017	0.0026	0.0095	0.0029	0.0056	0.0014	0.0265	0.0018	< LOD	0.0006	< LOD	0.0007	0.0021	0.0007
5288	09-25-2018 11:09	NAM-MS23	sample	GeoChem	GeoChem Trace	DualSoil	DualSoil	120	Passed	1.8938	0.9059	9.4429	0.343	56.8046	0.5378	0.5146	0.0409	< LOD	0.0137	0.2452	0.0188	0.5714	0.0144	3.9934	0.0306	0.97	0.0105	0.0071	0.0025	< LOD	0.003	0.8397	0.0163	12.0659	0.0485	0.017	0.0026	0.0113	0.0031	0.0068	0.0015	0.0291	0.0019	< LOD	0.0006	< LOD	0.0007	0.0019	0.0007
5289	09-25-2018 11:24	AMIS0454	CRM	GeoChem	GeoChem Trace	DualSoil	DualSoil	121	Passed	< LOD	1.2346	1.8158	0.2455	2.9415	0.153	< LOD	0.0353	< LOD	0.0222	< LOD	0.0159	0.0635	0.0126	0.1931	0.0151	37.2122	0.0808	< LOD	0.0201	< LOD	0.0062	0.4168	0.011	27.4989	0.0928	0.3521	0.016	0.044	0.0081	0.0098	0.0023	0.0376	0.0029	< LOD	0.0006	< LOD	0.0011	0.0022	0.0012
5290	09-25-2018 11:27	AMIS0454	CRM	GeoChem	GeoChem Trace	DualSoil	DualSoil	120	Passed	1.8744	1.2052	1.89	0.2439	2.9649	0.1542	< LOD	0.0358	< LOD	0.022	< LOD	0.0161	0.0589	0.0126	0.1925	0.0151	37.1977	0.0814	< LOD	0.0202	< LOD	0.0063	0.4187	0.011	27.552	0.0929	0.3404	0.0158	0.0402	0.0076	0.011	0.0023	0.0375	0.0028	< LOD	0.0006	< LOD	0.0011	0.0025	0.0012
5291	09-25-2018 11:30	AMIS0454	CRM	GeoChem	GeoChem Trace	DualSoil	DualSoil	120	Passed	1.9982	1.2867	1.8718	0.2477	2.9519	0.1545	< LOD	0.0353	< LOD	0.0223	< LOD	0.0162	0.0647	0.0126	0.1826	0.015	37.2533	0.0814	< LOD	0.0202	< LOD	0.0063	0.4153	0.011	27.541	0.0929	0.3443	0.0159	0.0411	0.0077	0.0107	0.0023	0.0393	0.0029	< LOD	0.0006	< LOD	0.0011	0.0029	0.0012
5292	09-25-2018 11:32	AMIS0454	CRM	GeoChem	GeoChem Trace	DualSoil	DualSoil	120	Passed	2.1501	1.2342	2.0816	0.2474	2.9255	0.1535	< LOD	0.0361	< LOD	0.022	< LOD	0.0162	0.0685	0.0127	0.1916	0.0151	37.1371	0.0812	< LOD	0.0202	< LOD	0.0062	0.4165	0.011	27.4903	0.0928	0.3426	0.0158	0.0434	0.008	0.0114	0.0024	0.0397	0.003	< LOD	0.0006	< LOD	0.0012	0.003	0.0013
5293	09-25-2018 11:38	AMIS0454	CRM	GeoChem	GeoChem Trace	DualSoil	DualSoil	120	Passed	1.7498	1.2128	1.8604	0.2429	2.9372	0.1534	< LOD	0.0354	< LOD	0.0223	< LOD	0.016	0.0701	0.0126	0.191	0.0149	37.1044	0.0812	< LOD	0.0202	< LOD	0.0062	0.4072	0.0109	27.4594	0.0927	0.3362	0.0158	0.0423	0.0077	0.0113	0.0023	0.0383	0.0028	< LOD	0.0006	< LOD	0.0011	0.0029	0.0012
5294	09-25-2018 11:41	NAM-MS43	cal sample	GeoChem	GeoChem Trace	DualSoil	DualSoil	120	Passed	1.9399	0.9628	10.1808	0.3642	51.1197	0.5138	0.5073	0.0449	< LOD	0.0153	0.2871	0.0199	0.4092	0.0134	3.7619	0.0305	1.5597	0.0134	0.0113	0.0032	< LOD	0.0035	1.0158	0.0178	14.9538	0.0543	0.0333	0.004	0.0129	0.0037	0.0063	0.0018	0.0263	0.002	< LOD	0.0006	0.0011	0.0008	0.0021	0.0008
5295	09-25-2018 11:44	NAM-MS43	cal sample	GeoChem	GeoChem Trace	DualSoil	DualSoil	120	Passed	2.3502	1.0007	10.118	0.3633	51.2407	0.5146	0.5295	0.0446	< LOD	0.0148	0.2876	0.0199	0.4208	0.0134	3.7475	0.0304	1.5671	0.0135	0.0117	0.0032	< LOD	0.0035	1.0246	0.0179	14.9525	0.0543	0.0307	0.004	0.0153	0.0037	0.0062	0.0018	0.025	0.002	< LOD	0.0007	< LOD	0.0008	0.0017	0.0008
5296	09-25-2018 11:46	NAM-MS43	cal sample	GeoChem	GeoChem Trace	DualSoil	DualSoil	120	Passed	2.1247	0.9733	10.0431	0.3614	51.2922	0.5147	0.5093	0.0447	< LOD	0.0151	0.3009	0.0197	0.4185	0.0134	3.7675	0.0305	1.5732	0.0135	0.0073	0.0032	< LOD	0.0035	1.0146	0.0178	14.9687	0.0543	0.0315	0.004	0.0161	0.0038	0.0062	0.0018	0.0247	0.002	< LOD	0.0006	< LOD	0.0008	0.0016	0.0008
5297	09-25-2018 11:49	NAM-MS43	cal sample	GeoChem	GeoChem Trace	DualSoil	DualSoil	120	Passed	1.8522	0.99	10.0397	0.3618	51.4587	0.5156	0.5369	0.0451	< LOD	0.0151	0.2951	0.0199	0.4161	0.0136	3.7682	0.0305	1.5928	0.0136	0.0078	0.0033	< LOD	0.0036	1.0104	0.0178	14.9221	0.0542	0.0312	0.0039	0.0154	0.0038	0.0065	0.0018	0.0259	0.002	< LOD	0.0007	< LOD	0.0008	0.0022	0.0008
5298	09-25-2018 11:52	NAM-MS43	cal sample	GeoChem	GeoChem Trace	DualSoil	DualSoil	120	Passed	2.2002	1.0145	10.0581	0.3633	51.8167	0.5183	0.5204	0.0446	< LOD	0.0151	0.3021	0.02	0.412	0.0134	3.7726	0.0305	1.5825	0.0135	0.0104	0.0032	< LOD	0.0035	1.0027	0.0177	15.0342	0.0545	0.0323	0.0039	0.0145	0.0037	0.0063	0.0017	0.0254	0.002	< LOD	0.0006	< LOD	0.0008	0.0019	0.0008
5299	09-25-2018 11:55	NAM-MS10	cal sample	GeoChem	GeoChem Trace	DualSoil	DualSoil	120	Passed	2.0834	1.1018	9.6557	0.3763	33.386	0.4199	< LOD	0.0411	< LOD	0.0177	0.2006	0.0185	0.2625	0.013	2.5649	0.0272	5.2279	0.026	< LOD	0.0064	< LOD	0.0048	1.3137	0.0199	21.4011	0.0665	0.0897	0.0091	0.0277	0.0057	0.0069	0.0023	0.0296	0.0025	< LOD	0.0007	< LOD	0.0009	0.0026	0.001
5300	09-25-2018 11:57	NAM-MS10	cal sample	GeoChem	GeoChem Trace	DualSoil	DualSoil	120	Passed	1.8366	1.1393	9.5289	0.374	32.6028	0.414	< LOD	0.0412	< LOD	0.0178	0.208	0.0182	0.2373	0.0131	2.5186	0.0271	5.1563	0.0259	< LOD	0.0065	< LOD	0.0049	1.3045	0.0198	21.2893	0.0663	0.0844	0.0093	0.0245	0.0054	0.0089	0.0023	0.0261	0.0023	< LOD	0.0007	< LOD	0.001	0.0032	0.001
5301	09-25-2018 12:00	NAM-MS10	cal sample	GeoChem	GeoChem Trace	DualSoil	DualSoil	120	Passed	2.3215	1.1221	9.6132	0.3748	33.4796	0.4202	< LOD	0.041	< LOD	0.0178	0.2171	0.0185	0.2629	0.013	2.5488	0.0271	5.1885	0.0259	< LOD	0.0064	< LOD	0.0047	1.314	0.0199	21.2203	0.0662	0.0836	0.009	0.0234	0.0052	0.008	0.0022	0.0279	0.0023	< LOD	0.0007	< LOD	0.0009	0.0024	0.001
5302	09-25-2018 12:03	NAM-MS10	cal sample	GeoChem	GeoChem Trace	DualSoil	DualSoil	120	Passed	1.9773	1.0969	9.2871	0.3707	33.6865	0.4217	< LOD	0.0407	< LOD	0.0178	0.229	0.0188	0.2494	0.0132	2.5608	0.0274	5.179	0.026	< LOD	0.0064	< LOD	0.0049	1.3219	0.02	21.3178	0.0664	0.09	0.0091	0.0265	0.0056	0.0095	0.0024	0.0288	0.0024	< LOD	0.0007	< LOD	0.001	0.0027	0.001
5303	09-25-2018 12:06	NAM-MS10	cal sample	GeoChem	GeoChem Trace	DualSoil	DualSoil	120	Passed	1.8913	1.1292	9.4844	0.3743	33.3176	0.4192	< LOD	0.0407	< LOD	0.0178	0.2189	0.0183	0.2343	0.0129	2.5095	0.0271	5.1168	0.0258	< LOD	0.0064	< LOD	0.0049	1.3097	0.0199	21.3068	0.0663	0.0853	0.0092	0.0257	0.0055	0.0093	0.0023	0.026	0.0023	< LOD	0.0007	< LOD	0.0009	0.0025	0.001
5304	09-25-2018 12:08	NAM-MS32	sample	GeoChem	GeoChem Trace	DualSoil	DualSoil	120	Passed	1.3271	0.9529	7.5763	0.3304	55.8237	0.5433	0.1995	0.0378	< LOD	0.0141	0.0615	0.0179	0.6979	0.0161	2.292	0.0247	2.4365	0.0165	0.0079	0.0033	< LOD	0.0037	0.7446	0.0153	16.4208	0.0565	0.0386	0.0035	0.0179	0.0044	0.0062	0.002	0.021	0.0021	< LOD	0.0008	< LOD	0.0008	0.0029	0.0009
5305	09-25-2018 12:12	NAM-MS32	sample	GeoChem	GeoChem Trace	DualSoil	DualSoil	120	Passed	1.3031	0.9057	7.9521	0.3346	56.2246	0.5456	0.1902	0.0379	< LOD	0.0144	0.0634	0.0181	0.7117	0.0162	2.2732	0.0246	2.4031	0.0163	0.0079	0.0033	< LOD	0.0037	0.7394	0.0153	16.4654	0.0566	0.0369	0.0033	0.0158	0.0043	0.0071	0.002	0.0194	0.002	< LOD	0.0008	< LOD	0.0009	0.003	0.0009
5306	09-25-2018 12:14	NAM-MS32	sample	GeoChem	GeoChem Trace	DualSoil	DualSoil	120	Passed	1.738	0.9165	7.9852	0.3351	55.7967	0.5434	0.1712	0.038	< LOD	0.0146	0.057	0.0181	0.6981	0.0162	2.2893	0.0246	2.3793	0.0163	0.0099	0.0033	< LOD	0.0037	0.7526	0.0154	16.4581	0.0566	0.0381	0.0034	0.014	0.0039	0.0077	0.0019	0.0189	0.0019	< LOD	0.0007	< LOD	0.0008	0.0026	0.0008
5307	09-25-2018 12:17	NAM-MS32	sample	GeoChem	GeoChem Trace	DualSoil	DualSoil	120	Passed	< LOD	0.9142	7.6377	0.3314	55.7036	0.5427	0.1797	0.038	< LOD	0.0144	0.0446	0.0178	0.6894	0.0161	2.2933	0.0247	2.4069	0.0164	0.0059	0.0033	< LOD	0.0038	0.7535	0.0154	16.4525	0.0566	0.0352	0.0035	0.0174	0.0043	0.0076	0.0021	0.019	0.002	< LOD	0.0008	< LOD	0.0008	0.0027	0.0009
5308	09-25-2018 12:19	NAM-MS32	sample	GeoChem	GeoChem Trace	DualSoil	DualSoil	120	Passed	1.328	0.9188	7.774	0.3325	56.3276	0.5465	0.1771	0.0378	< LOD	0.0144	0.0547	0.0182	0.7054	0.0162	2.279	0.0246	2.3752	0.0162	0.0077	0.0032	< LOD	0.0037	0.7515	0.0155	16.3309	0.0563	0.0341	0.0033	0.0162	0.0044	0.0069	0.002	0.021	0.0021	< LOD	0.0008	0.0013	0.0009	0.0031	0.0009
5309	09-25-2018 12:22	NAM-MS41	sample	GeoChem	GeoChem Trace	DualSoil	DualSoil	120	Passed	< LOD	0.8708	7.4739	0.3174	64.8272	0.584	0.1782	0.0357	< LOD	0.0134	0.1923	0.0192	0.9195	0.0172	2.0954	0.023	1.5125	0.0124	0.0067	0.0023	< LOD	0.0029	0.7014	0.015	11.891	0.0475	0.012	0.0013	0.0101	0.0033	0.0064	0.0017	0.0158	0.0017	< LOD	0.0007	< LOD	0.0007	0.0031	0.0008
5310	09-25-2018 12:25	NAM-MS41	sample	GeoChem	GeoChem Trace	DualSoil	DualSoil	120	Passed	1.5229	0.8729	7.6617	0.3199	64.5362	0.5822	0.17	0.0354	< LOD	0.0134	0.1869	0.0192	0.9063	0.0172	2.0877	0.023	1.523	0.0125	0.0047	0.0023	< LOD	0.003	0.6936	0.0148	11.9194	0.0476	0.0116	0.0013	0.0111	0.0033	0.0063	0.0017	0.0159	0.0017	< LOD	0.0007	0.0009	0.0008	0.0029	0.0008
5311	09-25-2018 12:28	NAM-MS41	sample	GeoChem	GeoChem Trace	DualSoil	DualSoil	120	Passed	1.1606	0.8631	7.7546	0.3211	64.7831	0.5837	0.1827	0.0358	< LOD	0.0136	0.1826	0.0193	0.8936	0.0172	2.0768	0.023	1.5167	0.0124	0.005	0.0023	< LOD	0.0031	0.6938	0.0148	11.9361	0.0476	0.0117	0.0013	0.0121	0.0032	0.0059	0.0016	0.0163	0.0017	< LOD	0.0007	< LOD	0.0007	0.0028	0.0008
5312	09-25-2018 12:30	NAM-MS41	sample	GeoChem	GeoChem Trace	DualSoil	DualSoil	120	Passed	1.4456	0.8826	7.5518	0.3168	64.782	0.5834	0.1762	0.0352	< LOD	0.0132	0.1858	0.0191	0.8898	0.0171	2.0686	0.0229	1.4781	0.0123	0.0046	0.0023	< LOD	0.003	0.7156	0.0151	11.8899	0.0475	0.0122	0.0013	0.0122	0.0033	0.0056	0.0017	0.015	0.0017	< LOD	0.0007	< LOD	0.0008	0.0033	0.0008
5313	09-25-2018 12:33	NAM-MS41	sample	GeoChem	GeoChem Trace	DualSoil	DualSoil	120	Passed	1.0475	0.8707	7.5639	0.318	64.6712	0.5827	0.1906	0.0353	< LOD	0.0133	0.1955	0.0191	0.8914	0.017	2.0793	0.0229	1.502	0.0124	0.0064	0.0023	< LOD	0.0029	0.6975	0.0149	11.9052	0.0475	0.0131	0.0013	0.0132	0.0032	0.0065	0.0016	0.0168	0.0017	< LOD	0.0007	< LOD	0.0007	0.003	0.0008
5314	09-25-2018 12:36	NAM-MS13	sample	GeoChem	GeoChem Trace	DualSoil	DualSoil	120	Passed	1.9076	0.992	7.7324	0.3359	49.4775	0.5099	< LOD	0.0368	< LOD	0.0158	0.0518	0.0176	0.6703	0.0161	2.4936	0.0259	3.4386	0.02	0.0086	0.0042	< LOD	0.004	0.7869	0.0157	17.469	0.059	0.0514	0.0049	0.0247	0.0047	0.0085	0.0021	0.0256	0.0023	< LOD	0.0008	0.0013	0.0009	0.0031	0.0009
5315	09-25-2018 12:38	NAM-MS13	sample	GeoChem	GeoChem Trace	DualSoil	DualSoil	120	Passed	1.745	0.9942	7.5481	0.3331	49.3547	0.5094	0.0399	0.0377	< LOD	0.0159	0.0703	0.0177	0.6639	0.0161	2.5448	0.0262	3.4758	0.0202	0.0105	0.0043	< LOD	0.004	0.7849	0.0157	17.5788	0.0593	0.0469	0.005	0.022	0.0047	0.0077	0.0021	0.023	0.0022	< LOD	0.0008	< LOD	0.0009	0.0029	0.0009
5316	09-25-2018 12:41	NAM-MS13	sample	GeoChem	GeoChem Trace	DualSoil	DualSoil	120	Passed	1.7017	1.0175	7.4707	0.3327	49.1708	0.5082	< LOD	0.0376	< LOD	0.0158	0.0503	0.0175	0.6757	0.0162	2.5273	0.0261	3.4424	0.0201	0.0085	0.0043	< LOD	0.004	0.7904	0.0157	17.5039	0.0592	0.0499	0.005	0.0222	0.0046	0.0096	0.0022	0.0229	0.0022	< LOD	0.0008	< LOD	0.0009	0.0032	0.001
5317	09-25-2018 12:44	NAM-MS13	sample	GeoChem	GeoChem Trace	DualSoil	DualSoil	120	Passed	1.7431	0.9676	7.5854	0.3333	49.6123	0.5109	0.0454	0.0378	< LOD	0.016	0.0529	0.0177	0.6721	0.0162	2.5302	0.0261	3.45	0.0201	0.0095	0.0042	< LOD	0.004	0.7932	0.0158	17.521	0.0592	0.0522	0.0049	0.0204	0.0045	0.0081	0.0021	0.0223	0.0021	< LOD	0.0007	< LOD	0.0009	0.0029	0.0009
5318	09-25-2018 12:46	NAM-MS13	sample	GeoChem	GeoChem Trace	DualSoil	DualSoil	120	Passed	1.5462	1.0388	7.7684	0.3391	49.2262	0.5091	0.0511	0.0378	< LOD	0.0162	0.0523	0.0178	0.6753	0.0163	2.547	0.0263	3.4754	0.0202	0.0094	0.0043	< LOD	0.004	0.8173	0.0161	17.6897	0.0595	0.0498	0.005	0.0221	0.0048	0.0092	0.0022	0.0243	0.0022	< LOD	0.0008	< LOD	0.0009	0.0032	0.001
5319	09-25-2018 12:49	NAM-MS24	sample	GeoChem	GeoChem Trace	DualSoil	DualSoil	120	Passed	1.9328	0.8972	8.8059	0.3325	60.9554	0.5601	0.4555	0.0392	< LOD	0.0131	0.2239	0.0188	0.6726	0.0152	3.4371	0.0285	1.0391	0.0107	0.0065	0.0023	< LOD	0.0029	0.7664	0.0156	11.5567	0.0472	0.0127	0.0018	0.0089	0.0029	0.0054	0.0015	0.0242	0.0018	< LOD	0.0006	< LOD	0.0007	0.002	0.0007
5320	09-25-2018 12:52	NAM-MS24	sample	GeoChem	GeoChem Trace	DualSoil	DualSoil	120	Passed	1.8102	0.8986	9.034	0.3356	60.957	0.5599	0.4335	0.0392	< LOD	0.0132	0.2046	0.0187	0.6573	0.0151	3.4458	0.0285	1.0003	0.0104	0.0067	0.0023	< LOD	0.0029	0.7754	0.0156	11.5245	0.0471	0.0134	0.0018	0.0122	0.0031	0.0062	0.0015	0.0247	0.0018	< LOD	0.0006	< LOD	0.0007	0.0026	0.0007
5321	09-25-2018 12:54	NAM-MS24	sample	GeoChem	GeoChem Trace	DualSoil	DualSoil	121	Passed	1.4276	0.9071	8.8814	0.3324	61.0543	0.5562	0.4412	0.039	< LOD	0.0133	0.2246	0.0189	0.665	0.015	3.4657	0.0284	1.0208	0.0104	0.0077	0.0023	0.0042	0.0029	0.7863	0.0158	11.6475	0.0474	0.0137	0.0018	0.0102	0.0029	0.0059	0.0015	0.0249	0.0018	< LOD	0.0006	< LOD	0.0007	0.0023	0.0007
5322	09-25-2018 12:57	NAM-MS24	sample	GeoChem	GeoChem Trace	DualSoil	DualSoil	121	Passed	2.0204	0.8722	9.4536	0.3382	61.6556	0.559	0.4837	0.0392	< LOD	0.0128	0.2289	0.019	0.6795	0.0151	3.4688	0.0283	0.9978	0.0103	0.0075	0.0022	0.005	0.0029	0.7715	0.0156	11.5527	0.0472	0.0133	0.0016	0.0096	0.0028	0.0055	0.0014	0.0233	0.0017	< LOD	0.0006	< LOD	0.0007	0.0026	0.0007
5323	09-25-2018 12:59	NAM-MS24	sample	GeoChem	GeoChem Trace	DualSoil	DualSoil	120	Passed	2.3055	0.9007	8.8603	0.3332	61.2069	0.5612	0.4456	0.0391	< LOD	0.013	0.2037	0.0188	0.6673	0.0151	3.4798	0.0286	1.0049	0.0104	0.0082	0.0023	< LOD	0.0029	0.7703	0.0156	11.5659	0.0472	0.0132	0.0018	0.0106	0.003	0.0054	0.0015	0.0248	0.0018	< LOD	0.0006	< LOD	0.0007	0.0025	0.0007
5324	09-25-2018 13:49	Granite AC-E	CRM	GeoChem	GeoChem Trace	DualSoil	DualSoil	121	Passed	< LOD	0.6903	13.4092	0.3554	67.1151	0.5558	< LOD	0.0223	< LOD	0.0109	< LOD	0.0143	4.189	0.0307	0.4317	0.0119	0.0471	0.0031	< LOD	0.0012	0.0063	0.0016	0.0427	0.0045	1.5666	0.0168	0	0	< LOD	0.0012	0.0017	0.0007	0.02	0.0011	< LOD	0.0004	< LOD	0.0004	0.0147	0.0006
5325	09-25-2018 13:52	Granite AC-E	CRM	GeoChem	GeoChem Trace	DualSoil	DualSoil	120	Passed	< LOD	0.6952	13.5685	0.3607	67.5004	0.5628	< LOD	0.0228	< LOD	0.011	0.0176	0.0146	4.236	0.0311	0.4365	0.0121	0.0462	0.0031	< LOD	0.0012	0.0066	0.0016	0.0446	0.0046	1.5821	0.0169	0	0	< LOD	0.0012	0.0017	0.0007	0.021	0.0011	0.0006	0.0004	< LOD	0.0004	0.0148	0.0006
5326	09-25-2018 13:55	Granite AC-E	CRM	GeoChem	GeoChem Trace	DualSoil	DualSoil	120	Passed	< LOD	0.7084	13.4343	0.3599	67.5601	0.5637	< LOD	0.0226	< LOD	0.011	< LOD	0.0148	4.2434	0.0312	0.4431	0.0121	0.0416	0.0031	< LOD	0.0012	0.0061	0.0016	0.0455	0.0046	1.595	0.017	0	0	< LOD	0.0012	0.0016	0.0007	0.0205	0.0011	< LOD	0.0004	< LOD	0.0004	0.0147	0.0006
5327	09-25-2018 13:58	Granite AC-E	CRM	GeoChem	GeoChem Trace	DualSoil	DualSoil	120	Passed	< LOD	0.6949	13.484	0.3596	67.6802	0.5638	< LOD	0.0228	< LOD	0.0111	< LOD	0.0147	4.2116	0.0311	0.4381	0.0121	0.0468	0.0031	< LOD	0.0012	0.0063	0.0016	0.0419	0.0045	1.5753	0.0169	0	0	< LOD	0.0012	0.0016	0.0006	0.0205	0.0011	0.0008	0.0004	< LOD	0.0004	0.0148	0.0006
5328	09-25-2018 14:00	Granite AC-E	CRM	GeoChem	GeoChem Trace	DualSoil	DualSoil	120	Passed	< LOD	0.7297	13.3159	0.3589	67.7292	0.5643	< LOD	0.0229	< LOD	0.0111	< LOD	0.0148	4.2203	0.0311	0.453	0.0122	0.0384	0.0031	< LOD	0.0012	0.0071	0.0016	0.0413	0.0045	1.5797	0.0169	0	0	< LOD	0.0012	0.0022	0.0007	0.0207	0.0011	< LOD	0.0004	< LOD	0.0004	0.0145	0.0006
5329	09-25-2018 14:03	NAM-MS21	cal sample	GeoChem	GeoChem Trace	DualSoil	DualSoil	120	Passed	1.194	0.7805	7.2129	0.2963	73.9249	0.6173	0.3668	0.0329	0.0166	0.0116	0.4709	0.0211	1.0496	0.0173	2.6458	0.0243	0.397	0.0065	0.0056	0.0013	0.0094	0.0021	0.4481	0.012	6.1976	0.034	0	0	0.0059	0.0021	0.0047	0.0011	0.0185	0.0014	< LOD	0.0005	< LOD	0.0006	0.0032	0.0006
5330	09-25-2018 14:06	NAM-MS21	cal sample	GeoChem	GeoChem Trace	DualSoil	DualSoil	120	Passed	1.3603	0.7579	7.3294	0.2958	73.8841	0.6169	0.3472	0.0327	< LOD	0.0114	0.4876	0.0212	1.0562	0.0173	2.6286	0.0242	0.3932	0.0064	0.0056	0.0013	0.0117	0.0021	0.4365	0.0119	6.2311	0.0341	0	0	0.006	0.0021	0.0052	0.0011	0.0172	0.0014	< LOD	0.0006	< LOD	0.0006	0.0034	0.0006
5331	09-25-2018 14:09	NAM-MS21	cal sample	GeoChem	GeoChem Trace	DualSoil	DualSoil	120	Passed	1.3932	0.7815	7.5731	0.3003	74.1564	0.6186	0.3665	0.033	< LOD	0.0114	0.4715	0.0213	1.0481	0.0173	2.6583	0.0244	0.3913	0.0064	0.0033	0.0012	0.0094	0.0021	0.4393	0.012	6.1727	0.0339	0	0	0.0058	0.002	0.0049	0.0011	0.0191	0.0014	< LOD	0.0006	< LOD	0.0006	0.0035	0.0006
5332	09-25-2018 14:12	NAM-MS21	cal sample	GeoChem	GeoChem Trace	DualSoil	DualSoil	120	Passed	1.117	0.8019	7.4211	0.2992	74.0335	0.618	0.3626	0.0333	0.0122	0.0116	0.4775	0.0211	1.0527	0.0173	2.6662	0.0244	0.4073	0.0065	0.0047	0.0013	0.009	0.0021	0.4394	0.0119	6.2155	0.0341	0	0	0.0046	0.002	0.0047	0.0011	0.0162	0.0013	< LOD	0.0005	< LOD	0.0006	0.0036	0.0006
5333	09-25-2018 14:14	NAM-MS21	cal sample	GeoChem	GeoChem Trace	DualSoil	DualSoil	120	Passed	1.6939	0.7817	7.3945	0.2981	74.2364	0.6197	0.3641	0.0328	0.0167	0.0114	0.4827	0.0214	1.0579	0.0174	2.6708	0.0244	0.4115	0.0066	0.0045	0.0013	0.0086	0.0021	0.4474	0.012	6.2772	0.0342	0	0	0.005	0.0021	0.0052	0.0011	0.0172	0.0014	< LOD	0.0006	< LOD	0.0006	0.0037	0.0006
5334	09-25-2018 14:17	NAM-MS45	cal sample	GeoChem	GeoChem Trace	DualSoil	DualSoil	120	Passed	2.4005	1.0389	9.8776	0.3691	45.0122	0.4846	0.2971	0.0464	< LOD	0.0164	0.1983	0.0192	0.3398	0.0131	3.6602	0.0307	2.7165	0.0181	0.0114	0.0043	< LOD	0.0041	1.0335	0.018	17.4614	0.0595	0.055	0.0057	0.0201	0.0048	0.0087	0.0023	0.0283	0.0024	< LOD	0.0008	< LOD	0.0009	0.0017	0.0009
5335	09-25-2018 14:20	NAM-MS45	cal sample	GeoChem	GeoChem Trace	DualSoil	DualSoil	120	Passed	2.0102	1.0382	10.0384	0.3713	44.9244	0.4838	0.326	0.0465	< LOD	0.0163	0.2042	0.0191	0.3282	0.0132	3.676	0.0308	2.7163	0.0181	0.0083	0.0044	< LOD	0.0042	1.0375	0.0181	17.4062	0.0594	0.049	0.0057	0.022	0.0047	0.0064	0.0021	0.0275	0.0023	< LOD	0.0007	< LOD	0.0009	0.0013	0.0009
5336	09-25-2018 14:23	NAM-MS45	cal sample	GeoChem	GeoChem Trace	DualSoil	DualSoil	120	Passed	1.7287	1.0438	9.8241	0.3689	45.0751	0.4847	0.3136	0.0465	< LOD	0.0165	0.1892	0.019	0.328	0.0132	3.6686	0.0308	2.7109	0.0181	0.0066	0.0043	< LOD	0.0042	1.0206	0.0179	17.3619	0.0593	0.0507	0.0057	0.0215	0.0048	0.009	0.0023	0.0303	0.0024	< LOD	0.0007	0.0009	0.0009	0.0016	0.0009
5337	09-25-2018 14:25	NAM-MS45	cal sample	GeoChem	GeoChem Trace	DualSoil	DualSoil	120	Passed	1.4186	1.0895	9.8309	0.371	45.1799	0.4855	0.3183	0.0465	< LOD	0.0163	0.1924	0.0189	0.3323	0.0132	3.6895	0.0309	2.7514	0.0182	0.0073	0.0044	< LOD	0.0042	1.0418	0.018	17.4284	0.0594	0.0505	0.0057	0.022	0.0047	0.0074	0.0022	0.0275	0.0022	< LOD	0.0007	< LOD	0.0009	0.0019	0.0009
5338	09-25-2018 14:28	NAM-MS45	cal sample	GeoChem	GeoChem Trace	DualSoil	DualSoil	120	Passed	2.032	1.0666	9.8324	0.3699	45.2664	0.4862	0.3133	0.0463	< LOD	0.0161	0.1979	0.0191	0.333	0.0132	3.7133	0.031	2.7462	0.0182	0.0057	0.0043	< LOD	0.0042	1.0321	0.018	17.4498	0.0595	0.0508	0.0056	0.0215	0.0046	0.008	0.0022	0.0276	0.0023	< LOD	0.0007	0.0012	0.0009	0.002	0.0009
5339	09-25-2018 14:32	NAM-MS29[2]	cal sample	GeoChem	GeoChem Trace	DualSoil	DualSoil	120	Passed	0.7861	0.6343	5.4857	0.2541	84.2245	0.6587	0.1545	0.0226	< LOD	0.0093	0.0776	0.0155	1.6575	0.0201	1.1672	0.0164	0.1511	0.0041	0.0011	0.0007	0.0072	0.0015	0.0601	0.005	1.3007	0.0153	0	0	< LOD	0.0014	0.0043	0.0008	0.006	0.0007	< LOD	0.0005	< LOD	0.0005	0.0059	0.0005
5340	09-25-2018 14:34	NAM-MS29[2]	cal sample	GeoChem	GeoChem Trace	DualSoil	DualSoil	120	Passed	< LOD	0.6212	5.4912	0.2536	83.8161	0.6559	0.1505	0.0224	< LOD	0.0092	0.0772	0.0154	1.6776	0.0202	1.191	0.0166	0.144	0.0041	0.0017	0.0007	0.0069	0.0015	0.0599	0.005	1.2752	0.0152	0	0	< LOD	0.0013	0.0038	0.0008	0.0056	0.0008	< LOD	0.0005	< LOD	0.0005	0.0059	0.0005
5341	09-25-2018 14:37	NAM-MS29[2]	cal sample	GeoChem	GeoChem Trace	DualSoil	DualSoil	120	Passed	0.7021	0.6466	5.4955	0.2554	84.2385	0.6589	0.1535	0.023	< LOD	0.0093	0.0754	0.0156	1.6663	0.0202	1.1592	0.0164	0.1484	0.0041	0.0016	0.0007	0.0079	0.0015	0.0587	0.0048	1.2881	0.0152	0	0	< LOD	0.0014	0.0041	0.0008	0.0056	0.0008	< LOD	0.0005	< LOD	0.0005	0.0061	0.0005
5342	09-25-2018 14:39	NAM-MS29[2]	cal sample	GeoChem	GeoChem Trace	DualSoil	DualSoil	120	Passed	0.7404	0.6231	5.4337	0.2532	84.2417	0.6588	0.152	0.0228	< LOD	0.0091	0.077	0.0155	1.6505	0.0201	1.145	0.0163	0.1535	0.0041	0.0019	0.0007	0.0084	0.0015	0.0586	0.0049	1.2864	0.0152	0	0	< LOD	0.0013	0.0044	0.0008	0.005	0.0007	< LOD	0.0005	< LOD	0.0005	0.0057	0.0005
5343	09-25-2018 14:42	NAM-MS29[2]	cal sample	GeoChem	GeoChem Trace	DualSoil	DualSoil	121	Passed	< LOD	0.6503	5.3199	0.2503	83.7752	0.6505	0.1528	0.0221	< LOD	0.0091	0.0765	0.0153	1.675	0.02	1.1819	0.0164	0.149	0.0041	0.0015	0.0007	0.0064	0.0015	0.0601	0.0048	1.2885	0.0152	0	0	< LOD	0.0014	0.0042	0.0008	0.0054	0.0008	< LOD	0.0005	< LOD	0.0005	0.006	0.0005
5344	09-25-2018 14:45	NAM-MS38	sample	GeoChem	GeoChem Trace	DualSoil	DualSoil	120	Passed	1.2087	0.9359	8.033	0.3287	56.8854	0.5418	0.3281	0.04	< LOD	0.015	0.3429	0.0202	0.6228	0.0152	2.603	0.0256	2.037	0.0148	< LOD	0.003	< LOD	0.0033	0.8378	0.0162	13.5255	0.0511	0.0232	0.0029	0.0132	0.0038	0.0063	0.0018	0.0199	0.0019	< LOD	0.0007	< LOD	0.0008	0.0025	0.0008
5345	09-25-2018 14:47	NAM-MS38	sample	GeoChem	GeoChem Trace	DualSoil	DualSoil	120	Passed	1.4641	0.9241	8.0189	0.3288	57.674	0.5466	0.3354	0.0401	< LOD	0.0149	0.3594	0.0206	0.6371	0.0154	2.6594	0.0259	1.9636	0.0145	< LOD	0.003	< LOD	0.0034	0.8697	0.0165	13.5278	0.0512	0.0257	0.0028	0.0154	0.0036	0.0064	0.0017	0.0188	0.0018	< LOD	0.0007	< LOD	0.0008	0.0021	0.0008
5346	09-25-2018 14:50	NAM-MS38	sample	GeoChem	GeoChem Trace	DualSoil	DualSoil	120	Passed	1.4723	0.9583	8.0901	0.3305	57.1716	0.5437	0.3493	0.0402	< LOD	0.0148	0.3588	0.0208	0.6207	0.0153	2.5679	0.0255	1.9839	0.0146	0.0032	0.003	< LOD	0.0033	0.8523	0.0164	13.6039	0.0513	0.0244	0.0029	0.0113	0.0036	0.0054	0.0017	0.018	0.0018	< LOD	0.0007	< LOD	0.0008	0.0022	0.0008
5347	09-25-2018 14:53	NAM-MS38	sample	GeoChem	GeoChem Trace	DualSoil	DualSoil	120	Passed	1.2812	0.917	7.8557	0.3251	56.9868	0.5426	0.3075	0.0402	< LOD	0.0151	0.3606	0.0203	0.6348	0.0152	2.6246	0.0257	2.0023	0.0147	0.0056	0.003	< LOD	0.0032	0.8486	0.0164	13.4584	0.051	0.0245	0.0029	0.0129	0.0037	0.0069	0.0018	0.0201	0.0019	< LOD	0.0007	0.0008	0.0008	0.0022	0.0008
5348	09-25-2018 14:55	NAM-MS38	sample	GeoChem	GeoChem Trace	DualSoil	DualSoil	120	Passed	< LOD	0.9344	8.0161	0.33	57.0252	0.5429	0.3331	0.0404	< LOD	0.0151	0.3625	0.0202	0.6443	0.0154	2.677	0.026	1.9653	0.0146	0.0033	0.003	< LOD	0.0033	0.8627	0.0165	13.5042	0.0511	0.0241	0.0029	0.0142	0.0036	0.0068	0.0017	0.019	0.0018	< LOD	0.0007	< LOD	0.0007	0.0021	0.0008
5349	09-25-2018 14:58	NAM-MS11	sample	GeoChem	GeoChem Trace	DualSoil	DualSoil	120	Passed	1.4607	1.0907	6.4877	0.3456	17.2108	0.3107	< LOD	0.0408	< LOD	0.021	0.2927	0.0178	0.1291	0.0118	1.1963	0.021	6.7236	0.0324	0.0339	0.0086	< LOD	0.0068	0.9745	0.0171	31.4705	0.0812	0.2071	0.0164	0.0372	0.0082	0.012	0.0029	0.0191	0.0024	< LOD	0.0008	< LOD	0.0012	0.0067	0.0014
5350	09-25-2018 15:01	NAM-MS11	sample	GeoChem	GeoChem Trace	DualSoil	DualSoil	120	Passed	1.625	1.0853	6.5449	0.3453	17.2982	0.3114	< LOD	0.0407	< LOD	0.0212	0.2836	0.018	0.1234	0.0118	1.1769	0.0209	6.7175	0.0324	0.03	0.0086	< LOD	0.0068	0.9645	0.017	31.5701	0.0813	0.2235	0.0164	0.0344	0.0083	0.0106	0.0029	0.0174	0.0024	< LOD	0.0008	0.0013	0.0012	0.007	0.0014
5351	09-25-2018 15:04	NAM-MS11	sample	GeoChem	GeoChem Trace	DualSoil	DualSoil	120	Passed	1.6226	1.0709	6.3581	0.3424	17.3896	0.3122	< LOD	0.0403	< LOD	0.0212	0.2876	0.018	0.124	0.0118	1.1856	0.021	6.6954	0.0324	0.0281	0.0086	< LOD	0.007	0.9649	0.0171	31.533	0.0813	0.2194	0.0164	0.0366	0.0084	0.0112	0.0029	0.0172	0.0024	< LOD	0.0008	< LOD	0.0012	0.007	0.0014
5352	09-25-2018 15:06	NAM-MS11	sample	GeoChem	GeoChem Trace	DualSoil	DualSoil	120	Passed	1.5319	1.0666	6.7516	0.3495	17.4615	0.3131	< LOD	0.0405	< LOD	0.0211	0.3061	0.0182	0.1294	0.0119	1.2052	0.0212	6.7994	0.0326	0.0311	0.0087	< LOD	0.0069	0.9613	0.017	31.6054	0.0813	0.2229	0.0163	0.0383	0.0085	0.0101	0.0029	0.0186	0.0024	< LOD	0.0007	< LOD	0.0012	0.0071	0.0014
5353	09-25-2018 15:09	NAM-MS11	sample	GeoChem	GeoChem Trace	DualSoil	DualSoil	120	Passed	1.5311	1.1041	6.3441	0.3417	17.1953	0.3104	< LOD	0.0403	< LOD	0.0212	0.2897	0.0179	0.1166	0.0117	1.1807	0.021	6.6896	0.0324	0.0273	0.0086	< LOD	0.007	0.9572	0.017	31.576	0.0812	0.215	0.0165	0.0343	0.0086	0.0077	0.0029	0.0188	0.0025	< LOD	0.0008	< LOD	0.0013	0.0072	0.0015
5354	09-25-2018 15:12	NAM-MS25	sample	GeoChem	GeoChem Trace	DualSoil	DualSoil	120	Passed	1.6919	0.9803	9.8612	0.3642	45.7167	0.486	0.23	0.0393	< LOD	0.0156	0.1789	0.018	0.3867	0.0135	2.7917	0.0271	2.0718	0.0157	0.0075	0.0038	< LOD	0.0039	1.0824	0.0182	17.2209	0.0579	0.0415	0.0056	0.0156	0.0042	0.006	0.0019	0.0222	0.002	< LOD	0.0006	0.0013	0.0008	0.0026	0.0009
5355	09-25-2018 15:15	NAM-MS25	sample	GeoChem	GeoChem Trace	DualSoil	DualSoil	121	Passed	1.9298	0.9635	9.9659	0.3613	46.262	0.485	0.2442	0.0388	< LOD	0.0154	0.1762	0.0182	0.3983	0.0134	2.8272	0.027	2.0597	0.0155	0.0079	0.0038	< LOD	0.0038	1.0863	0.0182	17.1843	0.0578	0.0394	0.0054	0.0143	0.0041	0.007	0.0019	0.0233	0.002	< LOD	0.0007	< LOD	0.0008	0.0025	0.0009
5356	09-25-2018 15:17	NAM-MS25	sample	GeoChem	GeoChem Trace	DualSoil	DualSoil	121	Passed	1.3849	1.0145	9.7627	0.3611	46.6194	0.4874	0.2763	0.0398	< LOD	0.0156	0.1745	0.018	0.3915	0.0134	2.7708	0.0268	2.0569	0.0155	0.0073	0.0038	< LOD	0.0039	1.0894	0.0182	17.2255	0.0579	0.0404	0.0054	0.0181	0.0042	0.008	0.0019	0.0235	0.002	< LOD	0.0007	< LOD	0.0008	0.0022	0.0009
5357	09-25-2018 15:20	NAM-MS25	sample	GeoChem	GeoChem Trace	DualSoil	DualSoil	120	Passed	2.0832	0.9989	10.2607	0.3696	46.1981	0.4889	0.2602	0.0393	< LOD	0.0153	0.1827	0.0184	0.3971	0.0135	2.7898	0.027	2.0626	0.0156	0.0073	0.0038	< LOD	0.004	1.0999	0.0183	17.2565	0.0579	0.0438	0.0054	0.0162	0.0042	0.0067	0.0019	0.0212	0.002	< LOD	0.0007	< LOD	0.0008	0.0023	0.0009
5358	09-25-2018 15:22	NAM-MS25	sample	GeoChem	GeoChem Trace	DualSoil	DualSoil	120	Passed	1.9705	1.0148	10.0988	0.3677	46.2989	0.4896	0.2501	0.0395	< LOD	0.0154	0.178	0.0184	0.3934	0.0135	2.821	0.0272	2.0567	0.0156	0.0074	0.0038	< LOD	0.0039	1.0826	0.0182	17.2946	0.058	0.0412	0.0054	0.0158	0.0044	0.0059	0.002	0.0239	0.0021	< LOD	0.0007	< LOD	0.0008	0.0024	0.0009
5359	09-25-2018 15:43	AMIS0454	CRM	GeoChem	GeoChem Trace	DualSoil	DualSoil	120	Passed	2.0488	1.2195	2.004	0.246	2.942	0.154	< LOD	0.0357	< LOD	0.0223	< LOD	0.0161	0.0773	0.0124	0.2107	0.0148	37.0915	0.0811	< LOD	0.0202	< LOD	0.0062	0.4104	0.0109	27.308	0.0924	0.3297	0.0157	0.0411	0.0079	0.0096	0.0023	0.0394	0.003	< LOD	0.0006	< LOD	0.0011	0.0024	0.0012
5360	09-25-2018 15:45	AMIS0454	CRM	GeoChem	GeoChem Trace	DualSoil	DualSoil	120	Passed	2.0501	1.2007	2.003	0.2485	2.9099	0.1543	< LOD	0.0366	< LOD	0.0222	< LOD	0.0161	0.0667	0.0126	0.1861	0.0149	37.1318	0.0812	< LOD	0.0202	< LOD	0.0063	0.4131	0.011	27.4818	0.0927	0.3403	0.0158	0.0391	0.0075	0.0106	0.0023	0.0377	0.0028	< LOD	0.0006	< LOD	0.001	0.0031	0.0012
5361	09-25-2018 15:48	AMIS0454	CRM	GeoChem	GeoChem Trace	DualSoil	DualSoil	120	Passed	1.531	1.2523	1.9132	0.2484	2.9205	0.1539	< LOD	0.0365	< LOD	0.0222	< LOD	0.016	0.0612	0.0127	0.1853	0.0151	37.1741	0.0813	< LOD	0.0202	< LOD	0.0063	0.4183	0.011	27.5338	0.0928	0.3401	0.0158	0.0403	0.0075	0.0108	0.0022	0.0382	0.0028	< LOD	0.0006	< LOD	0.0011	0.0027	0.0012
5362	09-25-2018 15:51	AMIS0454	CRM	GeoChem	GeoChem Trace	DualSoil	DualSoil	120	Passed	2.1573	1.273	1.8988	0.2439	3.0493	0.1551	< LOD	0.0354	< LOD	0.0223	< LOD	0.0161	0.0662	0.0127	0.1878	0.0151	37.1762	0.0812	< LOD	0.0202	< LOD	0.0062	0.4117	0.0109	27.2942	0.0924	0.3331	0.0157	0.0355	0.0073	0.0092	0.0022	0.0367	0.0028	< LOD	0.0006	< LOD	0.0011	0.0022	0.0012
5363	09-25-2018 15:53	AMIS0454	CRM	GeoChem	GeoChem Trace	DualSoil	DualSoil	120	Passed	2.416	1.249	2.0209	0.2464	2.9571	0.1539	< LOD	0.0364	< LOD	0.0221	< LOD	0.0161	0.0649	0.0126	0.1947	0.015	37.0299	0.081	< LOD	0.0201	< LOD	0.0062	0.4117	0.0109	27.433	0.0926	0.3346	0.0157	0.0384	0.0076	0.0116	0.0024	0.0386	0.0029	< LOD	0.0006	< LOD	0.0011	0.0028	0.0012
5364	09-25-2018 15:57	NAM-MS37	cal sample	GeoChem	GeoChem Trace	DualSoil	DualSoil	120	Passed	0.8528	0.7029	6.192	0.2711	77.9362	0.6294	0.4119	0.0336	0.0113	0.0107	0.0885	0.0163	1.2267	0.018	2.9389	0.025	0.4324	0.0065	0.0028	0.0011	0.0088	0.0018	0.196	0.0083	3.0266	0.0239	0	0	0.0034	0.0017	0.0046	0.001	0.0129	0.0011	< LOD	0.0005	< LOD	0.0005	0.0041	0.0005
5365	09-25-2018 15:59	NAM-MS37	cal sample	GeoChem	GeoChem Trace	DualSoil	DualSoil	120	Passed	1.2685	0.7151	6.2923	0.2722	78.0594	0.63	0.404	0.0331	0.0118	0.0105	0.0983	0.0165	1.2098	0.0179	2.9178	0.0249	0.4288	0.0065	0.0021	0.0011	0.0093	0.0018	0.1944	0.0082	3.024	0.0239	0	0	0.0029	0.0017	0.005	0.001	0.0129	0.0011	< LOD	0.0005	< LOD	0.0005	0.0042	0.0005
5366	09-25-2018 16:02	NAM-MS37	cal sample	GeoChem	GeoChem Trace	DualSoil	DualSoil	120	Passed	1.0664	0.73	6.405	0.275	78.5441	0.633	0.399	0.0332	0.0115	0.0106	0.0761	0.0162	1.2205	0.018	2.8886	0.0248	0.4069	0.0063	0.0031	0.0011	0.01	0.0018	0.1949	0.0082	3.0149	0.0239	0	0	0.0026	0.0016	0.0043	0.0009	0.014	0.0011	< LOD	0.0005	< LOD	0.0005	0.0042	0.0005
5367	09-25-2018 16:04	NAM-MS37	cal sample	GeoChem	GeoChem Trace	DualSoil	DualSoil	120	Passed	1.4729	0.7378	6.3637	0.2752	78.1998	0.6315	0.4097	0.0339	< LOD	0.0107	0.0861	0.0164	1.2225	0.018	2.9286	0.0249	0.4116	0.0063	0.0032	0.0011	0.0093	0.0018	0.2073	0.0085	3.0384	0.024	0	0	0.0033	0.0017	0.0041	0.0009	0.0126	0.0011	< LOD	0.0005	< LOD	0.0005	0.0041	0.0005
5368	09-25-2018 16:07	NAM-MS37	cal sample	GeoChem	GeoChem Trace	DualSoil	DualSoil	121	Passed	0.8732	0.7263	6.4134	0.2733	78.9088	0.6302	0.4101	0.0331	0.0139	0.0104	0.0889	0.0162	1.2411	0.018	2.8918	0.0246	0.4028	0.0062	0.0022	0.0011	0.0086	0.0017	0.1989	0.0083	3.0169	0.0239	0	0	0.003	0.0016	0.0043	0.0009	0.012	0.0011	< LOD	0.0005	< LOD	0.0005	0.0043	0.0005
5369	09-25-2018 16:10	NAM-MS27	sample	GeoChem	GeoChem Trace	DualSoil	DualSoil	120	Passed	1.5165	0.9374	8.4327	0.3393	56.0712	0.5417	0.1269	0.0357	< LOD	0.0144	0.1537	0.0186	0.6509	0.0156	2.1386	0.0237	2.0273	0.0149	0.0051	0.0031	< LOD	0.0035	0.8902	0.0166	15.1629	0.0541	0.0315	0.0033	0.0151	0.0037	0.0065	0.0018	0.0186	0.0018	< LOD	0.0007	0.0008	0.0008	0.0021	0.0008
5370	09-25-2018 16:13	NAM-MS27	sample	GeoChem	GeoChem Trace	DualSoil	DualSoil	120	Passed	1.0365	0.9432	8.4563	0.3401	56.6979	0.5453	0.1015	0.0356	< LOD	0.0145	0.1546	0.0186	0.6743	0.0158	2.1307	0.0237	1.9933	0.0147	0.0064	0.003	< LOD	0.0035	0.8775	0.0166	15.1849	0.0541	0.0298	0.0031	0.0194	0.0042	0.006	0.0019	0.0207	0.002	< LOD	0.0007	< LOD	0.0008	0.0029	0.0009
5371	09-25-2018 16:15	NAM-MS27	sample	GeoChem	GeoChem Trace	DualSoil	DualSoil	120	Passed	1.2948	0.9581	8.4235	0.3393	56.5211	0.5441	0.1318	0.0357	< LOD	0.0141	0.1586	0.0187	0.6561	0.0156	2.1457	0.0238	2.0275	0.0149	< LOD	0.003	< LOD	0.0035	0.8912	0.0167	15.1163	0.054	0.0288	0.0032	0.0157	0.0039	0.0059	0.0018	0.0178	0.0018	< LOD	0.0007	< LOD	0.0008	0.0023	0.0008
5372	09-25-2018 16:18	NAM-MS27	sample	GeoChem	GeoChem Trace	DualSoil	DualSoil	120	Passed	1.7325	0.9467	8.3811	0.3374	56.1616	0.542	0.1331	0.0359	< LOD	0.0142	0.1759	0.0188	0.6689	0.0157	2.1474	0.0238	2.0415	0.0149	0.0039	0.0031	< LOD	0.0036	0.8771	0.0165	15.2535	0.0543	0.0331	0.0033	0.0182	0.0039	0.0066	0.0018	0.0181	0.0018	< LOD	0.0007	< LOD	0.0008	0.0024	0.0008
5373	09-25-2018 16:21	NAM-MS27	sample	GeoChem	GeoChem Trace	DualSoil	DualSoil	120	Passed	1.4445	0.9372	8.5463	0.3395	56.6748	0.5451	0.1735	0.0361	< LOD	0.0141	0.1769	0.0189	0.6727	0.0158	2.1737	0.0239	2.0308	0.0149	0.0043	0.003	< LOD	0.0036	0.8712	0.0165	15.2749	0.0543	0.0299	0.0031	0.015	0.0038	0.0066	0.0018	0.0186	0.0019	< LOD	0.0007	< LOD	0.0008	0.003	0.0008
5374	09-25-2018 16:24	NAM-MS9	sample	GeoChem	GeoChem Trace	DualSoil	DualSoil	120	Passed	1.5172	1.0732	5.3976	0.3256	13.0619	0.2744	< LOD	0.0454	< LOD	0.0227	0.418	0.0184	0.1015	0.0117	1.3017	0.0219	9.7971	0.0397	0.014	0.0103	< LOD	0.0071	0.7872	0.0154	31.5721	0.084	0.2448	0.0173	0.0462	0.0089	0.0139	0.0031	0.0233	0.0026	< LOD	0.0008	< LOD	0.0013	0.0054	0.0015
5375	09-25-2018 16:26	NAM-MS9	sample	GeoChem	GeoChem Trace	DualSoil	DualSoil	121	Passed	1.7497	1.0812	5.2374	0.3184	13.0861	0.2724	< LOD	0.0448	< LOD	0.0224	0.4145	0.0183	0.0917	0.0116	1.2616	0.0216	9.751	0.0393	0.0265	0.0102	< LOD	0.0069	0.7673	0.0153	31.5498	0.0839	0.2489	0.0173	0.0471	0.0096	0.0111	0.0033	0.021	0.0027	< LOD	0.0008	< LOD	0.0013	0.0064	0.0015
5376	09-25-2018 16:29	NAM-MS9	sample	GeoChem	GeoChem Trace	DualSoil	DualSoil	121	Passed	1.2322	1.1123	5.37	0.3247	13.24	0.2742	< LOD	0.045	< LOD	0.0222	0.4033	0.0184	0.1076	0.0118	1.3082	0.0219	9.8329	0.0395	0.0156	0.0103	< LOD	0.0071	0.7896	0.0155	31.8801	0.0845	0.2637	0.0174	0.0472	0.0093	0.0111	0.0031	0.0214	0.0026	< LOD	0.0008	< LOD	0.0013	0.0065	0.0015
5377	09-25-2018 16:32	NAM-MS9	sample	GeoChem	GeoChem Trace	DualSoil	DualSoil	120	Passed	1.8646	1.1111	5.4663	0.3273	13.2496	0.2763	< LOD	0.0456	< LOD	0.0222	0.4079	0.0188	0.108	0.0119	1.2816	0.0219	9.9414	0.04	0.0129	0.0104	< LOD	0.007	0.7948	0.0156	31.7395	0.0843	0.2822	0.0174	0.0473	0.0092	0.0116	0.0031	0.0232	0.0027	< LOD	0.0008	< LOD	0.0013	0.0063	0.0015
5378	09-25-2018 16:34	NAM-MS9	sample	GeoChem	GeoChem Trace	DualSoil	DualSoil	121	Passed	1.9623	1.106	5.3516	0.3234	13.331	0.2751	< LOD	0.0452	< LOD	0.0219	0.4087	0.0185	0.0961	0.0116	1.2915	0.0218	9.8111	0.0394	< LOD	0.0102	< LOD	0.007	0.7808	0.0155	31.8934	0.0844	0.2645	0.0173	0.0435	0.0092	0.013	0.0032	0.0208	0.0026	< LOD	0.0008	< LOD	0.0013	0.0062	0.0015
5379	09-25-2018 16:47	CS-M2	cal std	GeoChem	GeoChem Trace	DualSoil	DualSoil	62	Passed	< LOD	1.0074	12.3844	0.4812	71.36	0.8037	0.0672	0.0292	0.1456	0.019	< LOD	0.0204	4.7469	0.045	0.9326	0.0214	0.1514	0.0056	< LOD	0.0017	0.0069	0.0023	0.0959	0.0087	1.5834	0.0243	0	0	0.0028	0.002	0.0225	0.0019	0.0719	0.0029	0.0075	0.0018	< LOD	0.0006	0.0145	0.0009
5380	09-25-2018 16:49	CS-M2	cal std	GeoChem	GeoChem Trace	DualSoil	DualSoil	62	Passed	< LOD	1.0487	12.2056	0.4806	71.416	0.8054	0.0701	0.0301	0.1473	0.0193	< LOD	0.0205	4.8231	0.0455	0.9293	0.0215	0.1602	0.0058	< LOD	0.0017	0.0073	0.0023	0.0975	0.0089	1.5866	0.0244	0	0	0.0026	0.002	0.0221	0.0019	0.0717	0.0029	0.0063	0.0018	< LOD	0.0005	0.0143	0.0009
5381	09-25-2018 16:50	CS-M2	cal std	GeoChem	GeoChem Trace	DualSoil	DualSoil	61	Passed	< LOD	1.0583	12.5296	0.4925	71.8607	0.8212	0.0654	0.0302	0.1399	0.0192	< LOD	0.0211	4.8234	0.0461	0.9469	0.0218	0.158	0.0057	< LOD	0.0016	0.0074	0.0022	0.0948	0.0089	1.6053	0.0245	0	0	< LOD	0.002	0.0223	0.0019	0.0739	0.0029	0.0072	0.0018	< LOD	0.0006	0.0144	0.0009
5382	09-25-2018 16:52	CS-M2	cal std	GeoChem	GeoChem Trace	DualSoil	DualSoil	61	Passed	< LOD	1.0318	12.624	0.494	71.5962	0.8192	0.08	0.0312	0.1446	0.0195	< LOD	0.0212	4.8172	0.0461	0.9297	0.0217	0.1531	0.0057	< LOD	0.0017	0.0083	0.0023	0.0991	0.009	1.6047	0.0245	0	0	< LOD	0.0019	0.0222	0.0019	0.0708	0.0028	0.0072	0.0018	< LOD	0.0006	0.0134	0.0009
5383	09-25-2018 16:53	CS-M2	cal std	GeoChem	GeoChem Trace	DualSoil	DualSoil	61	Passed	< LOD	1.0652	12.6006	0.4935	71.5267	0.8186	0.0762	0.031	0.1384	0.0194	< LOD	0.0213	4.8543	0.0463	0.9515	0.0219	0.1593	0.0058	< LOD	0.0017	0.007	0.0023	0.0927	0.0087	1.5828	0.0243	0	0	0.0022	0.0019	0.0253	0.002	0.0743	0.003	0.0089	0.0019	< LOD	0.0006	0.0144	0.0009
5384	09-25-2018 16:55	CS-M2	cal std	GeoChem	GeoChem Trace	DualSoil	DualSoil	60	Passed	< LOD	1.0765	12.7807	0.5044	72.0687	0.8367	0.069	0.0312	0.1355	0.0196	< LOD	0.0217	4.7961	0.0468	0.9308	0.0222	0.156	0.0058	< LOD	0.0017	0.0072	0.0024	0.0986	0.0088	1.6064	0.0245	0	0	0.0029	0.0019	0.0244	0.0019	0.0741	0.0029	0.0055	0.0018	< LOD	0.0006	0.0141	0.0009
5385	09-25-2018 16:57	CS-M2	cal std	GeoChem	GeoChem Trace	DualSoil	DualSoil	61	Passed	< LOD	1.0564	12.5998	0.494	71.9306	0.8219	0.0766	0.0309	0.1346	0.0191	< LOD	0.021	4.8011	0.046	0.9225	0.0217	0.1538	0.0057	< LOD	0.0016	0.007	0.0022	0.0957	0.0087	1.6068	0.0245	0	0	0.0034	0.002	0.0233	0.0019	0.0717	0.0029	0.0065	0.0018	< LOD	0.0006	0.0146	0.0009
5386	09-25-2018 16:58	CS-M2	cal std	GeoChem	GeoChem Trace	DualSoil	DualSoil	62	Passed	< LOD	1.0093	12.6359	0.4852	72.1282	0.8103	0.0783	0.0288	0.1477	0.0189	< LOD	0.0209	4.8329	0.0455	0.937	0.0215	0.1537	0.0056	< LOD	0.0016	0.006	0.0023	0.0965	0.0089	1.6087	0.0245	0	0	0.0026	0.002	0.0231	0.0019	0.0751	0.0029	0.0056	0.0018	< LOD	0.0006	0.0141	0.0009
5387	09-25-2018 17:00	CS-M2	cal std	GeoChem	GeoChem Trace	DualSoil	DualSoil	60	Passed	< LOD	1.0838	12.4262	0.4991	72.0529	0.8364	0.0675	0.0314	0.1322	0.0197	< LOD	0.0213	4.8037	0.0468	0.934	0.0222	0.1493	0.0058	< LOD	0.0017	0.0074	0.0023	0.092	0.0087	1.6128	0.0246	0	0	0.0032	0.002	0.0222	0.0019	0.0733	0.0029	0.0065	0.0018	< LOD	0.0006	0.0143	0.0009
5388	09-25-2018 17:01	CS-M2	cal std	GeoChem	GeoChem Trace	DualSoil	DualSoil	62	Passed	< LOD	1.0585	12.8373	0.4892	71.929	0.8089	0.0691	0.0292	0.1395	0.0188	< LOD	0.0207	4.8032	0.0453	0.9434	0.0215	0.155	0.0056	< LOD	0.0016	0.0062	0.0022	0.0937	0.0087	1.6112	0.0245	0	0	0.0032	0.002	0.0226	0.0019	0.0748	0.0029	0.0064	0.0018	< LOD	0.0006	0.0138	0.0009
5389	09-25-2018 17:03	CS-M2	cal std	GeoChem	GeoChem Trace			61.2	Passed	< LOD	1.0496	12.5624	0.4914	71.7869	0.8182	0.072	0.0303	0.1405	0.0193	< LOD	0.021	4.8102	0.0459	0.9358	0.0217	0.155	0.0057	< LOD	0.0017	0.0071	0.0023	0.0957	0.0088	1.6009	0.0245	0	0	0.0026	0.002	0.023	0.0019	0.0732	0.0029	0.0068	0.0018	< LOD	0.0006	0.0142	0.0009
5689	09-27-2018 08:54	CS-M2	cal std	GeoChem	GeoChem Trace	DualSoil	DualSoil	60	Passed	< LOD	1.0398	12.178	0.4955	70.5798	0.8256	0.0683	0.0314	0.1258	0.0197	< LOD	0.0213	4.8236	0.047	0.9503	0.0224	0.159	0.006	< LOD	0.0018	0.0057	0.0024	0.0927	0.0088	1.6396	0.0247	0	0	0.0022	0.002	0.0231	0.0019	0.0722	0.0029	0.0078	0.0018	< LOD	0.0006	0.0146	0.0009
5690	09-27-2018 08:56	CS-M2	cal std	GeoChem	GeoChem Trace	DualSoil	DualSoil	60	Passed	< LOD	1.0636	12.3028	0.4971	70.7283	0.8264	0.0616	0.0305	0.1344	0.0197	< LOD	0.021	4.8303	0.047	0.9473	0.0223	0.1642	0.006	< LOD	0.0018	0.0075	0.0024	0.0983	0.0089	1.6456	0.0248	0	0	0.0027	0.002	0.0226	0.0019	0.0724	0.0029	0.0064	0.0018	< LOD	0.0005	0.0141	0.0009
5691	09-27-2018 08:57	CS-M2	cal std	GeoChem	GeoChem Trace	DualSoil	DualSoil	60	Passed	< LOD	1.0882	12.2166	0.4968	70.6268	0.8257	0.0721	0.0312	0.1332	0.0196	< LOD	0.0213	4.8168	0.0469	0.9462	0.0223	0.1611	0.0059	< LOD	0.0018	0.0087	0.0024	0.089	0.0087	1.6151	0.0245	0	0	0.0025	0.002	0.0223	0.0019	0.0716	0.0029	0.0077	0.0018	< LOD	0.0005	0.0143	0.0009
5692	09-27-2018 09:02	CS-M2	cal std	GeoChem	GeoChem Trace	DualSoil	DualSoil	61	Passed	< LOD	1.0351	12.1742	0.4872	71.0794	0.8163	0.0744	0.0307	0.1368	0.0193	< LOD	0.021	4.8434	0.0463	0.9504	0.022	0.1587	0.0058	< LOD	0.0017	0.0087	0.0023	0.0943	0.0088	1.6232	0.0246	0	0	0.0021	0.0019	0.0222	0.0018	0.0712	0.0028	0.0067	0.0018	< LOD	0.0006	0.0144	0.0009
5693	09-27-2018 09:04	CS-M2	cal std	GeoChem	GeoChem Trace	DualSoil	DualSoil	62	Passed	< LOD	1.0591	12.1908	0.4809	71.262	0.8046	0.0484	0.0295	0.1336	0.019	0.025	0.0207	4.8288	0.0455	0.9455	0.0216	0.1558	0.0057	< LOD	0.0017	0.0081	0.0023	0.0957	0.0089	1.6186	0.0246	0	0	< LOD	0.0019	0.0226	0.0019	0.0738	0.0029	0.007	0.0018	< LOD	0.0006	0.0145	0.0009
5694	09-27-2018 09:05	CS-M2	cal std	GeoChem	GeoChem Trace	DualSoil	DualSoil	60	Passed	< LOD	1.0323	12.1907	0.4951	70.8312	0.8272	0.0669	0.0308	0.1466	0.0199	< LOD	0.0212	4.8603	0.0471	0.9364	0.0222	0.1564	0.0059	< LOD	0.0017	0.0082	0.0023	0.0922	0.0087	1.6127	0.0245	0	0	0.0027	0.002	0.0228	0.0019	0.0715	0.0029	0.007	0.0018	< LOD	0.0006	0.0144	0.0009
5695	09-27-2018 09:07	CS-M2	cal std	GeoChem	GeoChem Trace	DualSoil	DualSoil	60	Passed	< LOD	1.0716	12.3128	0.4988	70.9638	0.8289	0.0574	0.032	0.1357	0.02	< LOD	0.0215	4.8441	0.0471	0.9362	0.0223	0.1615	0.006	< LOD	0.0017	0.0083	0.0023	0.0965	0.0089	1.6084	0.0245	0	0	0.003	0.002	0.0222	0.0019	0.0743	0.0029	0.0077	0.0018	< LOD	0.0006	0.0144	0.0009
5696	09-27-2018 09:08	CS-M2	cal std	GeoChem	GeoChem Trace	DualSoil	DualSoil	60	Passed	< LOD	1.0555	12.3054	0.4983	71.0604	0.8294	0.0583	0.0314	0.1454	0.02	< LOD	0.0211	4.8407	0.047	0.9515	0.0224	0.1569	0.0059	< LOD	0.0017	0.0083	0.0024	0.0914	0.0087	1.6106	0.0245	0	0	0.002	0.0019	0.0231	0.0019	0.0709	0.0028	0.0078	0.0018	< LOD	0.0006	0.0143	0.0009
5697	09-27-2018 09:10	CS-M2	cal std	GeoChem	GeoChem Trace	DualSoil	DualSoil	60	Passed	< LOD	1.0283	12.3017	0.498	70.8841	0.8283	0.0599	0.0309	0.134	0.0197	< LOD	0.0211	4.8529	0.0471	0.9507	0.0224	0.1609	0.006	< LOD	0.0018	0.0082	0.0024	0.0957	0.0089	1.6105	0.0245	0	0	0.0035	0.002	0.0234	0.0019	0.0728	0.0029	0.0075	0.0018	< LOD	0.0005	0.0142	0.0009
5698	09-27-2018 09:11	CS-M2	cal std	GeoChem	GeoChem Trace	DualSoil	DualSoil	60	Passed	< LOD	1.0678	12.1643	0.4964	71.1808	0.8307	0.0641	0.0313	0.1406	0.0198	< LOD	0.0212	4.8337	0.047	0.9505	0.0223	0.1564	0.0059	< LOD	0.0017	0.0077	0.0024	0.0932	0.0088	1.6085	0.0245	0	0	0.0026	0.002	0.0236	0.0019	0.0731	0.0029	0.0057	0.0018	< LOD	0.0006	0.0142	0.0009
5699	09-27-2018 09:13	CS-M2	cal std	GeoChem	GeoChem Trace	DualSoil	DualSoil	60	Passed	< LOD	1.0333	12.0111	0.4925	70.9585	0.8288	0.0573	0.0314	0.1291	0.0198	< LOD	0.0212	4.7983	0.0469	0.9481	0.0224	0.162	0.006	< LOD	0.0017	0.0072	0.0023	0.0998	0.009	1.6112	0.0245	0	0	< LOD	0.0019	0.0226	0.0019	0.0723	0.0029	0.0058	0.0018	< LOD	0.0006	0.0147	0.0009
5700	09-27-2018 09:14	CS-M2	cal std	GeoChem	GeoChem Trace	DualSoil	DualSoil	60	Passed	< LOD	1.0306	12.3089	0.4966	71.1127	0.8296	0.0618	0.0308	0.1437	0.0199	< LOD	0.0211	4.8214	0.047	0.949	0.0224	0.1532	0.0059	< LOD	0.0017	0.0066	0.0024	0.0973	0.0089	1.6248	0.0246	0	0	< LOD	0.0019	0.0226	0.0019	0.0744	0.0029	0.008	0.0018	< LOD	0.0006	0.0143	0.0009
5701	09-27-2018 09:16	CS-M2	cal std	GeoChem	GeoChem Trace	DualSoil	DualSoil	60	Passed	< LOD	1.0404	12.6956	0.5036	71.3347	0.8317	0.055	0.0309	0.1462	0.0199	< LOD	0.0215	4.8531	0.0471	0.9461	0.0223	0.1573	0.0059	0.0022	0.0017	0.0089	0.0023	0.0973	0.0089	1.601	0.0244	0	0	< LOD	0.0018	0.0235	0.0019	0.0728	0.0029	0.0065	0.0018	< LOD	0.0005	0.014	0.0009
5702	09-27-2018 09:17	CS-M2	cal std	GeoChem	GeoChem Trace	DualSoil	DualSoil	60	Passed	< LOD	1.008	12.2204	0.4946	71.2293	0.8304	0.0759	0.031	0.1493	0.02	< LOD	0.0211	4.8868	0.0472	0.9613	0.0224	0.1589	0.0059	< LOD	0.0017	0.0081	0.0023	0.0923	0.0087	1.6206	0.0246	0	0	< LOD	0.002	0.0227	0.0019	0.0748	0.0029	0.0066	0.0018	< LOD	0.0005	0.0147	0.0009
5703	09-27-2018 09:19	CS-M2	cal std	GeoChem	GeoChem Trace			60.2	Passed	< LOD	1.0427	12.2702	0.4955	71.0818	0.827	0.0605	0.031	0.1404	0.0198	< LOD	0.0212	4.842	0.0469	0.9475	0.0223	0.1579	0.0059	< LOD	0.0017	0.008	0.0023	0.0951	0.0088	1.6127	0.0245	0	0	0.002	0.0019	0.0229	0.0019	0.0731	0.0029	0.007	0.0018	< LOD	0.0006	0.0144	0.0009
5704	09-27-2018 09:24	MB060	qtz blank	GeoChem	GeoChem Trace	DualSoil	DualSoil	60	Passed	0.8584	0.7741	< LOD	0.158	85.8278	0.9267	0.0557	0.018	< LOD	0.0113	< LOD	0.0171	< LOD	0.0066	< LOD	0.0069	< LOD	0.0033	0.0008	0.0007	0.0073	0.0018	< LOD	0.0031	0.0277	0.0035	0	0	< LOD	0.0015	0.0023	0.0007	0.0009	0.0006	< LOD	0.0005	< LOD	0.0004	< LOD	0.0005
5705	09-27-2018 09:25	MB060	qtz blank	GeoChem	GeoChem Trace	DualSoil	DualSoil	60	Passed	< LOD	0.7868	< LOD	0.1544	85.1925	0.9204	0.0568	0.0176	< LOD	0.0118	< LOD	0.0166	< LOD	0.0067	< LOD	0.0071	< LOD	0.0033	< LOD	0.0007	0.0052	0.0018	< LOD	0.0033	0.0289	0.0036	0	0	< LOD	0.0014	0.002	0.0007	0.0008	0.0006	< LOD	0.0005	< LOD	0.0004	< LOD	0.0005
5706	09-27-2018 09:27	MB060	qtz blank	GeoChem	GeoChem Trace	DualSoil	DualSoil	60	Passed	< LOD	0.8015	< LOD	0.1555	85.6815	0.9251	0.0558	0.0181	< LOD	0.0116	< LOD	0.0168	< LOD	0.0066	< LOD	0.0071	< LOD	0.0031	< LOD	0.0007	0.0045	0.0019	< LOD	0.0033	0.0293	0.0035	0	0	< LOD	0.0014	0.0018	0.0007	0.0008	0.0006	< LOD	0.0005	< LOD	0.0004	< LOD	0.0005
5707	09-27-2018 09:28	MB060	qtz blank	GeoChem	GeoChem Trace	DualSoil	DualSoil	60	Passed	< LOD	0.7695	< LOD	0.1579	86.0196	0.9284	0.057	0.0148	< LOD	0.0116	< LOD	0.0168	< LOD	0.0067	< LOD	0.0068	< LOD	0.0033	< LOD	0.0007	0.0063	0.0018	< LOD	0.0034	0.0268	0.0035	0	0	< LOD	0.0015	0.0025	0.0007	0.001	0.0006	< LOD	0.0005	< LOD	0.0004	< LOD	0.0005
5708	09-27-2018 09:30	MB060	qtz blank	GeoChem	GeoChem Trace	DualSoil	DualSoil	60	Passed	< LOD	0.802	< LOD	0.1618	86.1585	0.9296	0.0559	0.014	< LOD	0.0112	< LOD	0.0169	< LOD	0.0067	< LOD	0.007	< LOD	0.0033	0.0011	0.0007	0.0038	0.0018	< LOD	0.0032	0.0275	0.0035	0	0	< LOD	0.0015	0.0023	0.0007	0.0012	0.0005	< LOD	0.0005	< LOD	0.0004	< LOD	0.0005
5709	09-27-2018 09:34	Granite AC-E	CRM	GeoChem	GeoChem Trace	DualSoil	DualSoil	120	Passed	< LOD	0.7167	13.4671	0.3599	67.1693	0.5612	< LOD	0.0223	< LOD	0.0113	0.0267	0.0148	4.2108	0.031	0.4447	0.0121	0.047	0.0031	< LOD	0.0012	0.0065	0.0016	0.0434	0.0045	1.5815	0.0169	0	0	< LOD	0.0012	0.0017	0.0006	0.0208	0.0011	0.0008	0.0004	< LOD	0.0004	0.0146	0.0006
5710	09-27-2018 09:37	Granite AC-E	CRM	GeoChem	GeoChem Trace	DualSoil	DualSoil	120	Passed	< LOD	0.6902	13.1888	0.3568	67.2098	0.5617	< LOD	0.0228	< LOD	0.0115	0.019	0.0147	4.2537	0.0312	0.4582	0.0123	0.0479	0.0031	< LOD	0.0012	0.0072	0.0016	0.0424	0.0046	1.5808	0.0169	0	0	< LOD	0.0012	0.002	0.0007	0.0203	0.0011	< LOD	0.0004	< LOD	0.0004	0.0146	0.0006
5711	09-27-2018 09:39	Granite AC-E	CRM	GeoChem	GeoChem Trace	DualSoil	DualSoil	120	Passed	< LOD	0.7096	13.4309	0.3598	67.2708	0.5618	0.0231	0.0227	< LOD	0.0113	0.0196	0.0149	4.2202	0.0311	0.4576	0.0123	0.0482	0.0031	0.0022	0.0012	0.0082	0.0016	0.0436	0.0046	1.5778	0.0169	0	0	< LOD	0.0012	0.0019	0.0007	0.0208	0.0011	< LOD	0.0004	< LOD	0.0004	0.0154	0.0006
5712	09-27-2018 09:42	Granite AC-E	CRM	GeoChem	GeoChem Trace	DualSoil	DualSoil	120	Passed	< LOD	0.7094	13.4628	0.3597	67.4543	0.563	< LOD	0.0225	< LOD	0.0115	0.0221	0.0149	4.2427	0.0311	0.4623	0.0122	0.0493	0.0031	< LOD	0.0012	0.0077	0.0016	0.0431	0.0046	1.5858	0.0169	0	0	< LOD	0.0012	0.0017	0.0007	0.0203	0.0011	< LOD	0.0004	< LOD	0.0004	0.0146	0.0006
5713	09-27-2018 09:44	Granite AC-E	CRM	GeoChem	GeoChem Trace	DualSoil	DualSoil	120	Passed	< LOD	0.7297	13.269	0.3587	67.322	0.5625	< LOD	0.023	< LOD	0.0115	0.0242	0.0149	4.2676	0.0313	0.4602	0.0123	0.0499	0.0031	< LOD	0.0012	0.0074	0.0016	0.0429	0.0045	1.6021	0.017	0	0	< LOD	0.0012	0.0019	0.0007	0.0202	0.0011	< LOD	0.0004	< LOD	0.0003	0.0144	0.0006
5714	09-27-2018 09:47	NAM-MS26	cal sample	GeoChem	GeoChem Trace	DualSoil	DualSoil	120	Passed	1.4286	0.9863	9.7222	0.3653	51.2649	0.5202	0.2566	0.0403	< LOD	0.0151	0.2269	0.0197	0.5113	0.0146	2.7789	0.027	2.1891	0.0158	0.0066	0.0035	< LOD	0.0039	1.036	0.0179	17.1948	0.0581	0.0445	0.0044	0.015	0.0041	0.0082	0.002	0.0234	0.002	< LOD	0.0007	< LOD	0.0008	0.0025	0.0008
5715	09-27-2018 09:50	NAM-MS26	cal sample	GeoChem	GeoChem Trace	DualSoil	DualSoil	120	Passed	1.6228	0.9987	10.1125	0.3713	51.0817	0.519	0.2575	0.0404	< LOD	0.0152	0.2301	0.02	0.526	0.0147	2.7654	0.0269	2.2103	0.0158	0.0088	0.0035	< LOD	0.0038	1.0335	0.0179	17.1608	0.058	0.0422	0.0043	0.0157	0.004	0.0063	0.0019	0.0241	0.002	< LOD	0.0007	< LOD	0.0008	0.0028	0.0008
5716	09-27-2018 09:52	NAM-MS26	cal sample	GeoChem	GeoChem Trace	DualSoil	DualSoil	120	Passed	1.8947	1.0211	9.8383	0.367	51.0663	0.5192	0.2474	0.0403	< LOD	0.0152	0.2407	0.02	0.5153	0.0148	2.78	0.027	2.2037	0.0159	0.0065	0.0036	< LOD	0.0039	1.0516	0.018	17.2941	0.0582	0.0433	0.0044	0.0189	0.0043	0.0059	0.002	0.0234	0.0021	< LOD	0.0007	< LOD	0.0008	0.0029	0.0009
5717	09-27-2018 10:20	NAM-MS26	cal sample	GeoChem	GeoChem Trace	DualSoil	DualSoil	120	Passed	1.827	0.9995	9.8374	0.3665	51.5625	0.5219	0.2288	0.0398	< LOD	0.0152	0.2186	0.0201	0.5116	0.0147	2.7757	0.027	2.1647	0.0157	0.0055	0.0035	< LOD	0.0039	1.0363	0.0179	17.1558	0.058	0.0423	0.0043	0.0174	0.0042	0.0067	0.0019	0.0241	0.0021	< LOD	0.0007	< LOD	0.0008	0.0027	0.0009
5718	09-27-2018 10:23	NAM-MS26	cal sample	GeoChem	GeoChem Trace	DualSoil	DualSoil	120	Passed	1.6223	1.0111	9.7549	0.3663	51.422	0.521	0.2737	0.0409	< LOD	0.0153	0.2294	0.02	0.514	0.0147	2.7673	0.027	2.1876	0.0158	< LOD	0.0035	< LOD	0.0039	1.0553	0.0181	17.1082	0.0579	0.0448	0.0043	0.0166	0.004	0.0081	0.0019	0.0223	0.002	< LOD	0.0007	< LOD	0.0008	0.0029	0.0008
5719	09-27-2018 10:26	NAM-MS34	cal sample	GeoChem	GeoChem Trace	DualSoil	DualSoil	120	Passed	< LOD	0.6716	6.6772	0.2747	80.9847	0.6402	0.1877	0.0252	0.0243	0.0103	0.4315	0.0195	2.2026	0.023	1.644	0.0191	0.1811	0.0044	0.0014	0.0008	0.0069	0.0015	0.0738	0.0055	1.2935	0.0155	0	0	< LOD	0.0014	0.0038	0.0008	0.0065	0.0008	< LOD	0.0005	< LOD	0.0005	0.0074	0.0005
5720	09-27-2018 10:28	NAM-MS34	cal sample	GeoChem	GeoChem Trace	DualSoil	DualSoil	120	Passed	< LOD	0.6681	6.6435	0.2747	81.2232	0.6422	0.1822	0.0258	0.0135	0.0104	0.4126	0.0196	2.1834	0.0229	1.6642	0.0192	0.1822	0.0044	0.0011	0.0008	0.0074	0.0015	0.0719	0.0054	1.2692	0.0153	0	0	< LOD	0.0013	0.0038	0.0008	0.0065	0.0008	0.0006	0.0005	< LOD	0.0005	0.0074	0.0005
5721	09-27-2018 10:31	NAM-MS34	cal sample	GeoChem	GeoChem Trace	DualSoil	DualSoil	120	Passed	< LOD	0.6823	6.4919	0.2732	81.3231	0.6426	0.1833	0.0255	0.0169	0.0103	0.4162	0.0195	2.2087	0.023	1.6609	0.0192	0.1795	0.0044	0.0016	0.0008	0.0071	0.0015	0.0751	0.0055	1.2778	0.0154	0	0	< LOD	0.0014	0.0037	0.0008	0.0067	0.0008	< LOD	0.0005	< LOD	0.0005	0.0075	0.0005
5722	09-27-2018 10:34	NAM-MS34	cal sample	GeoChem	GeoChem Trace	DualSoil	DualSoil	120	Passed	0.6853	0.676	6.6689	0.2742	81.3334	0.6425	0.1925	0.0253	0.0202	0.0103	0.4189	0.0196	2.1664	0.0228	1.6407	0.0191	0.1753	0.0044	< LOD	0.0008	0.0074	0.0015	0.0767	0.0055	1.2945	0.0154	0	0	< LOD	0.0014	0.0039	0.0008	0.0065	0.0008	< LOD	0.0005	< LOD	0.0005	0.0076	0.0005
5723	09-27-2018 10:36	NAM-MS34	cal sample	GeoChem	GeoChem Trace	DualSoil	DualSoil	120	Passed	0.6727	0.6712	6.8784	0.2779	81.5066	0.6439	0.1842	0.0257	0.0133	0.0103	0.4121	0.0196	2.2147	0.0231	1.6864	0.0193	0.1848	0.0044	0.0012	0.0008	0.0075	0.0015	0.0834	0.0057	1.2865	0.0154	0	0	< LOD	0.0014	0.0041	0.0008	0.0068	0.0008	< LOD	0.0005	< LOD	0.0005	0.0077	0.0005
5724	09-27-2018 10:39	NAM-MS6[2]	cal sample	GeoChem	GeoChem Trace	DualSoil	DualSoil	120	Passed	1.6964	1.09	7.2495	0.3516	22.1627	0.3484	< LOD	0.0431	< LOD	0.0201	0.0855	0.0169	0.167	0.0125	1.7281	0.024	7.6763	0.0337	< LOD	0.0086	< LOD	0.0063	1.0404	0.0177	27.347	0.0766	0.1724	0.0136	0.041	0.0076	0.0117	0.0028	0.0237	0.0025	< LOD	0.0008	< LOD	0.0011	0.0048	0.0013
5725	09-27-2018 10:42	NAM-MS6[2]	cal sample	GeoChem	GeoChem Trace	DualSoil	DualSoil	120	Passed	1.7854	1.0754	7.2071	0.3513	22.2098	0.3489	< LOD	0.043	< LOD	0.0203	0.0755	0.0168	0.1638	0.0124	1.7226	0.0239	7.6478	0.0336	< LOD	0.0086	< LOD	0.0063	1.0387	0.0177	27.2999	0.0765	0.1703	0.0136	0.0356	0.0074	0.0098	0.0027	0.0233	0.0025	< LOD	0.0008	< LOD	0.0011	0.0047	0.0013
5726	09-27-2018 10:44	NAM-MS6[2]	cal sample	GeoChem	GeoChem Trace	DualSoil	DualSoil	120	Passed	1.1444	1.0807	7.2073	0.3521	22.0873	0.3483	< LOD	0.0432	< LOD	0.0205	0.0744	0.0168	0.168	0.0125	1.7372	0.0241	7.7467	0.0339	< LOD	0.0087	< LOD	0.0064	1.0302	0.0176	27.5429	0.0769	0.1686	0.0137	0.0394	0.0076	0.0118	0.0028	0.0238	0.0025	< LOD	0.0008	0.0013	0.0011	0.004	0.0013
5727	09-27-2018 10:50	NAM-MS6[2]	cal sample	GeoChem	GeoChem Trace	DualSoil	DualSoil	120	Passed	1.556	1.0941	7.4188	0.3561	22.4237	0.3508	< LOD	0.0434	< LOD	0.0202	0.0767	0.017	0.1727	0.0125	1.7379	0.0241	7.7513	0.0338	< LOD	0.0086	< LOD	0.0063	1.0047	0.0174	27.7118	0.0772	0.1742	0.0136	0.0323	0.0076	0.0091	0.0028	0.0229	0.0025	< LOD	0.0008	0.0015	0.0012	0.0045	0.0013
5728	09-27-2018 10:53	NAM-MS6[2]	cal sample	GeoChem	GeoChem Trace	DualSoil	DualSoil	120	Passed	1.1374	1.0886	7.2844	0.3544	22.2232	0.349	< LOD	0.0425	< LOD	0.0202	0.0621	0.0166	0.1633	0.0125	1.7544	0.0242	7.6321	0.0336	< LOD	0.0086	< LOD	0.0063	1.0379	0.0177	27.5797	0.0769	0.1619	0.0136	0.0323	0.0073	0.0095	0.0027	0.0232	0.0025	< LOD	0.0008	< LOD	0.0011	0.0048	0.0012
5729	09-27-2018 10:56	NAM-MS1	sample	GeoChem	GeoChem Trace	DualSoil	DualSoil	120	Passed	4.4987	1.0877	4.3337	0.2683	58.8189	0.5466	< LOD	0.039	< LOD	0.0137	0.6982	0.0232	0.6818	0.0156	5.7801	0.0362	3.1312	0.0187	0.0098	0.0035	0.024	0.0034	0.2272	0.0092	9.4459	0.0451	0.0139	0.0021	0.0198	0.0035	0.0135	0.0021	0.014	0.0017	< LOD	0.0007	< LOD	0.0008	0.0025	0.0008
5730	09-27-2018 10:58	NAM-MS1	sample	GeoChem	GeoChem Trace	DualSoil	DualSoil	120	Passed	4.2308	1.083	4.592	0.2707	58.9315	0.5473	< LOD	0.0387	< LOD	0.0138	0.6976	0.0232	0.6873	0.0157	5.8528	0.0364	3.1352	0.0187	0.0087	0.0035	0.0199	0.0034	0.2234	0.0091	9.5463	0.0453	0.0148	0.0021	0.0232	0.0036	0.0123	0.0021	0.0132	0.0017	< LOD	0.0007	< LOD	0.0008	0.0027	0.0008
5731	09-27-2018 11:01	NAM-MS1	sample	GeoChem	GeoChem Trace	DualSoil	DualSoil	120	Passed	4.7004	1.0665	4.511	0.2685	59.1845	0.5487	< LOD	0.0389	< LOD	0.0135	0.7066	0.0234	0.6896	0.0156	5.7464	0.0361	3.1754	0.0188	0.0076	0.0035	0.017	0.0034	0.2307	0.0092	9.5098	0.0452	0.0162	0.0021	0.0228	0.0036	0.0137	0.0021	0.0141	0.0017	< LOD	0.0007	< LOD	0.0008	0.0027	0.0008
5732	09-27-2018 11:04	NAM-MS1	sample	GeoChem	GeoChem Trace	DualSoil	DualSoil	120	Passed	3.9006	1.043	4.271	0.2648	58.7089	0.5462	< LOD	0.039	< LOD	0.0137	0.7093	0.0231	0.685	0.0156	5.8151	0.0364	3.1937	0.0189	0.0094	0.0036	0.0201	0.0034	0.2354	0.0093	9.6161	0.0455	0.0162	0.0022	0.02	0.0035	0.0137	0.0021	0.0143	0.0017	< LOD	0.0007	< LOD	0.0008	0.0023	0.0008
5733	09-27-2018 11:06	NAM-MS1	sample	GeoChem	GeoChem Trace	DualSoil	DualSoil	120	Passed	4.2105	1.0929	4.4945	0.2706	59.4237	0.5503	< LOD	0.0387	< LOD	0.0137	0.7246	0.0235	0.6868	0.0156	5.8896	0.0365	3.1436	0.0187	0.0107	0.0035	0.0182	0.0033	0.2303	0.0092	9.5481	0.0454	0.016	0.0021	0.0178	0.0034	0.0133	0.0021	0.0133	0.0017	< LOD	0.0007	< LOD	0.0008	0.0025	0.0008
5734	09-27-2018 11:09	NAM-MS31	sample	GeoChem	GeoChem Trace	DualSoil	DualSoil	120	Passed	0.9026	0.6847	5.8393	0.2661	80.704	0.6469	0.2457	0.0286	0.0131	0.0104	0.1296	0.0169	1.2451	0.0181	1.9477	0.0208	0.4636	0.0066	0.0033	0.001	0.0095	0.0018	0.1664	0.0076	3.6448	0.0259	0	0	0.0023	0.0017	0.0045	0.0009	0.0073	0.0009	< LOD	0.0005	< LOD	0.0005	0.0044	0.0006
5735	09-27-2018 11:12	NAM-MS31	sample	GeoChem	GeoChem Trace	DualSoil	DualSoil	120	Passed	< LOD	0.6995	5.8411	0.2669	80.8252	0.6479	0.2439	0.0286	0.012	0.0104	0.1334	0.017	1.2498	0.0182	1.9433	0.0208	0.4594	0.0065	0.0024	0.001	0.0073	0.0018	0.1644	0.0076	3.6223	0.0258	0	0	0.0022	0.0017	0.0041	0.0009	0.0076	0.001	< LOD	0.0005	< LOD	0.0005	0.0042	0.0006
5736	09-27-2018 11:15	NAM-MS31	sample	GeoChem	GeoChem Trace	DualSoil	DualSoil	120	Passed	0.8171	0.6826	5.8704	0.2661	80.9722	0.6485	0.2529	0.0285	0.0172	0.0104	0.1361	0.0171	1.2491	0.0182	1.958	0.0209	0.4578	0.0065	0.0026	0.001	0.0081	0.0018	0.1615	0.0076	3.6301	0.0259	0	0	0.0028	0.0017	0.0035	0.0009	0.0068	0.0009	< LOD	0.0005	< LOD	0.0005	0.0043	0.0006
5737	09-27-2018 11:17	NAM-MS31	sample	GeoChem	GeoChem Trace	DualSoil	DualSoil	120	Passed	1.1027	0.7166	5.8523	0.2679	81.0121	0.649	0.2378	0.0287	0.0133	0.0104	0.1356	0.0172	1.2712	0.0183	1.9562	0.0208	0.4537	0.0065	0.0029	0.001	0.0087	0.0018	0.1607	0.0075	3.6245	0.0258	0	0	< LOD	0.0016	0.0046	0.001	0.007	0.0009	< LOD	0.0005	< LOD	0.0005	0.0044	0.0006
5738	09-27-2018 11:20	NAM-MS31	sample	GeoChem	GeoChem Trace	DualSoil	DualSoil	120	Passed	1.1578	0.7398	5.9141	0.2686	80.7989	0.6474	0.2419	0.0284	0.013	0.0104	0.1328	0.017	1.2499	0.0182	1.9497	0.0208	0.4584	0.0065	0.0035	0.001	0.0086	0.0018	0.1659	0.0077	3.5401	0.0255	0	0	< LOD	0.0016	0.004	0.0009	0.0067	0.0009	< LOD	0.0005	< LOD	0.0005	0.0042	0.0005
5739	09-27-2018 11:23	NAM-MS36	sample	GeoChem	GeoChem Trace	DualSoil	DualSoil	120	Passed	1.3105	0.8146	6.8349	0.2877	73.2243	0.609	0.4898	0.0376	0.0249	0.0116	0.1833	0.0176	1.0707	0.0173	3.6217	0.0279	0.7122	0.0083	0.0045	0.0015	0.0084	0.002	0.3132	0.0103	4.7866	0.0304	0	0	0.0027	0.0019	0.0043	0.0011	0.0186	0.0014	< LOD	0.0005	< LOD	0.0005	0.0036	0.0006
5740	09-27-2018 11:26	NAM-MS36	sample	GeoChem	GeoChem Trace	DualSoil	DualSoil	120	Passed	1.3292	0.809	6.9306	0.2889	73.5693	0.6113	0.5162	0.038	0.0193	0.0115	0.1912	0.0178	1.0782	0.0174	3.6012	0.0278	0.6894	0.0082	0.0035	0.0014	0.0105	0.002	0.3267	0.0105	4.8593	0.0306	0	0	0.0036	0.0019	0.0044	0.0011	0.0181	0.0014	< LOD	0.0005	< LOD	0.0005	0.0033	0.0006
5741	09-27-2018 11:29	NAM-MS36	sample	GeoChem	GeoChem Trace	DualSoil	DualSoil	120	Passed	1.5275	0.822	6.9657	0.2894	73.5292	0.6107	0.5166	0.0379	0.0268	0.0115	0.1899	0.0178	1.0683	0.0173	3.6564	0.028	0.702	0.0082	0.0045	0.0015	0.0097	0.002	0.3099	0.0102	4.78	0.0304	0	0	0.0037	0.0019	0.005	0.0011	0.0185	0.0014	< LOD	0.0005	< LOD	0.0005	0.0033	0.0006
5742	09-27-2018 11:31	NAM-MS36	sample	GeoChem	GeoChem Trace	DualSoil	DualSoil	121	Passed	1.2873	0.8088	6.8671	0.2848	73.0656	0.6027	0.511	0.0374	0.0327	0.0116	0.1914	0.0174	1.0673	0.0172	3.6312	0.0277	0.7197	0.0083	0.0045	0.0015	0.0105	0.002	0.309	0.0102	4.7897	0.0304	0	0	0.0045	0.002	0.0043	0.0011	0.0182	0.0014	0.0008	0.0005	< LOD	0.0005	0.0034	0.0006
5743	09-27-2018 11:34	NAM-MS36	sample	GeoChem	GeoChem Trace	DualSoil	DualSoil	120	Passed	1.2562	0.818	6.7509	0.2862	73.4503	0.6102	0.5178	0.0381	0.0261	0.0116	0.1939	0.0177	1.0655	0.0173	3.5816	0.0277	0.6934	0.0082	0.004	0.0015	0.0102	0.002	0.322	0.0104	4.8067	0.0305	0	0	0.0041	0.002	0.004	0.0011	0.0173	0.0013	< LOD	0.0005	< LOD	0.0005	0.0033	0.0006
5744	09-27-2018 11:38	AMIS0454	CRM	GeoChem	GeoChem Trace	DualSoil	DualSoil	120	Passed	1.398	1.2228	1.9015	0.247	2.9224	0.1546	< LOD	0.0365	< LOD	0.0227	< LOD	0.0159	0.0632	0.0127	0.1902	0.0152	37.1743	0.0813	< LOD	0.0202	< LOD	0.0062	0.4184	0.011	27.4025	0.0926	0.3299	0.0157	0.0439	0.0077	0.0101	0.0022	0.0373	0.0028	< LOD	0.0006	< LOD	0.0011	0.0022	0.0012
5745	09-27-2018 11:41	AMIS0454	CRM	GeoChem	GeoChem Trace	DualSoil	DualSoil	120	Passed	1.6313	1.2276	1.9764	0.2495	2.9402	0.1536	< LOD	0.035	< LOD	0.0227	< LOD	0.0161	0.0692	0.0128	0.1958	0.0151	37.2432	0.0814	< LOD	0.0202	< LOD	0.0062	0.4114	0.011	27.4691	0.0928	0.3401	0.0158	0.0384	0.0079	0.0105	0.0023	0.0408	0.003	< LOD	0.0006	< LOD	0.0011	0.0029	0.0013
5746	09-27-2018 11:45	AMIS0454	CRM	GeoChem	GeoChem Trace	DualSoil	DualSoil	120	Passed	1.3179	1.2081	1.808	0.2423	2.8726	0.1525	< LOD	0.0354	< LOD	0.0225	< LOD	0.0157	0.063	0.0126	0.1915	0.0149	37.0062	0.081	< LOD	0.0202	< LOD	0.0062	0.4023	0.0108	27.0574	0.0919	0.3327	0.0157	0.0385	0.0076	0.0113	0.0023	0.0424	0.003	< LOD	0.0006	< LOD	0.0011	0.0033	0.0013
5747	09-27-2018 11:48	AMIS0454	CRM	GeoChem	GeoChem Trace	DualSoil	DualSoil	120	Passed	1.9181	1.2215	2.0052	0.2481	2.9672	0.1547	< LOD	0.0357	< LOD	0.0223	< LOD	0.0162	0.0676	0.0127	0.1932	0.0151	37.1736	0.0812	< LOD	0.0202	< LOD	0.0062	0.4121	0.0109	27.4	0.0926	0.3304	0.0157	0.0438	0.0082	0.0108	0.0024	0.0409	0.003	< LOD	0.0006	0.0013	0.0012	0.0034	0.0013
5748	09-27-2018 11:52	AMIS0454	CRM	GeoChem	GeoChem Trace	DualSoil	DualSoil	120	Passed	1.8464	1.218	1.8894	0.248	2.9953	0.1558	< LOD	0.0357	< LOD	0.0222	< LOD	0.016	0.0699	0.0126	0.1903	0.015	37.0449	0.081	< LOD	0.0202	< LOD	0.0062	0.4131	0.0109	27.1668	0.0921	0.3268	0.0157	0.0396	0.0078	0.0116	0.0024	0.04	0.003	< LOD	0.0006	< LOD	0.0011	0.0033	0.0012
5749	09-27-2018 11:56	NAM-MS40	cal sample	GeoChem	GeoChem Trace	DualSoil	DualSoil	120	Passed	1.4498	0.8881	7.5731	0.3216	63.0188	0.5768	0.1676	0.0383	< LOD	0.0137	0.0855	0.0185	0.7892	0.0165	2.4296	0.0248	1.9675	0.0143	0.0052	0.0026	< LOD	0.0032	0.6834	0.0149	12.9333	0.0501	0.0168	0.0017	0.0158	0.0039	0.0069	0.0019	0.019	0.0019	< LOD	0.0008	0.0011	0.0008	0.0027	0.0009
5750	09-27-2018 11:59	NAM-MS40	cal sample	GeoChem	GeoChem Trace	DualSoil	DualSoil	120	Passed	0.9832	0.8921	7.7389	0.3257	63.0715	0.5777	0.1706	0.0393	< LOD	0.0138	0.0977	0.0185	0.7879	0.0165	2.4807	0.025	2.0142	0.0144	0.0076	0.0026	< LOD	0.0032	0.6898	0.0149	13.0528	0.0504	0.0168	0.0017	0.0162	0.0038	0.0089	0.002	0.018	0.0019	< LOD	0.0008	< LOD	0.0008	0.0026	0.0009
5751	09-27-2018 12:07	NAM-MS40	cal sample	GeoChem	GeoChem Trace	DualSoil	DualSoil	120	Passed	1.7014	0.8921	7.8442	0.3254	63.4107	0.5795	0.1891	0.0381	< LOD	0.0136	0.1046	0.0188	0.7823	0.0165	2.4701	0.0249	1.9906	0.0143	0.0047	0.0026	< LOD	0.0033	0.709	0.0151	13.1454	0.0505	0.0169	0.0016	0.0147	0.0037	0.0065	0.0019	0.0174	0.0019	< LOD	0.0008	< LOD	0.0008	0.0029	0.0008
5752	09-27-2018 12:10	NAM-MS40	cal sample	GeoChem	GeoChem Trace	DualSoil	DualSoil	122	Passed	2.0573	0.914	7.8835	0.3218	63.7429	0.5723	0.1992	0.0381	< LOD	0.0133	0.0865	0.0187	0.79	0.0163	2.4851	0.0246	1.9673	0.014	0.0051	0.0025	< LOD	0.0032	0.7041	0.0151	13.1938	0.0506	0.0161	0.0015	0.0157	0.0038	0.0068	0.0019	0.0176	0.0019	< LOD	0.0007	0.0009	0.0008	0.0026	0.0008
5753	09-27-2018 12:16	NAM-MS40	cal sample	GeoChem	GeoChem Trace	DualSoil	DualSoil	120	Passed	1.5545	0.9062	7.75	0.3247	63.3332	0.5786	0.1936	0.0385	< LOD	0.0136	0.089	0.0187	0.7839	0.0165	2.4292	0.0247	1.9675	0.0143	0.0059	0.0026	< LOD	0.0033	0.6934	0.0149	13.0039	0.0502	0.0169	0.0016	0.0143	0.0036	0.0065	0.0019	0.0178	0.0019	< LOD	0.0007	< LOD	0.0008	0.0028	0.0008
5754	09-27-2018 12:21	NAM-MS12	cal sample	GeoChem	GeoChem Trace	DualSoil	DualSoil	120	Passed	1.2859	1.1056	4.059	0.3093	15.753	0.3035	< LOD	0.0507	< LOD	0.0229	0.1883	0.0192	0.2571	0.014	1.0068	0.0205	11.1214	0.0428	0.0163	0.0106	< LOD	0.0078	0.5324	0.013	34.1417	0.0885	0.3402	0.0174	0.0616	0.0102	0.0139	0.0035	0.0226	0.0028	< LOD	0.0009	0.0016	0.0014	0.0076	0.0016
5755	09-27-2018 12:23	NAM-MS12	cal sample	GeoChem	GeoChem Trace	DualSoil	DualSoil	120	Passed	1.454	1.1379	4.0513	0.3089	15.7484	0.3033	< LOD	0.0503	< LOD	0.0228	0.2077	0.019	0.2646	0.014	1.0213	0.0205	11.1502	0.0429	0.0153	0.0106	< LOD	0.0078	0.5394	0.0131	34.3485	0.0889	0.3393	0.0174	0.0566	0.0108	0.0133	0.0037	0.0209	0.0029	< LOD	0.0009	0.0018	0.0014	0.0082	0.0017
5756	09-27-2018 12:26	NAM-MS12	cal sample	GeoChem	GeoChem Trace	DualSoil	DualSoil	120	Passed	1.849	1.1134	4.2766	0.3119	15.7039	0.303	< LOD	0.0508	< LOD	0.023	0.2067	0.0195	0.2646	0.014	1.0364	0.0206	11.1715	0.0429	0.0222	0.0106	< LOD	0.0078	0.5365	0.0132	34.247	0.0888	0.3407	0.0173	0.0583	0.0111	0.0135	0.0038	0.0212	0.003	< LOD	0.0009	0.002	0.0015	0.0072	0.0017
5757	09-27-2018 12:29	NAM-MS12	cal sample	GeoChem	GeoChem Trace	DualSoil	DualSoil	120	Passed	1.3495	1.0902	4.095	0.3099	15.969	0.3057	< LOD	0.0506	< LOD	0.0229	0.1866	0.0191	0.2701	0.0141	1.036	0.0206	11.1652	0.0429	0.0262	0.0106	< LOD	0.0078	0.5408	0.0131	34.1659	0.0886	0.3341	0.0173	0.0522	0.0102	0.0157	0.0037	0.0204	0.0027	< LOD	0.0009	0.002	0.0014	0.006	0.0016
5758	09-27-2018 12:32	NAM-MS12	cal sample	GeoChem	GeoChem Trace	DualSoil	DualSoil	120	Passed	1.2406	1.087	3.9967	0.3056	15.8016	0.303	< LOD	0.0497	< LOD	0.0226	0.1826	0.0188	0.262	0.0139	1.0282	0.0205	11.1153	0.0428	0.0185	0.0105	< LOD	0.0077	0.5303	0.013	33.9273	0.0883	0.3391	0.0173	0.0585	0.0105	0.0143	0.0036	0.022	0.0029	< LOD	0.0009	0.002	0.0014	0.0075	0.0017
5759	09-27-2018 12:37	NAM-MS8	sample	GeoChem	GeoChem Trace	DualSoil	DualSoil	120	Passed	1.9763	1.0912	5.0702	0.3196	11.7612	0.2629	< LOD	0.0469	< LOD	0.0222	0.1218	0.0169	0.1004	0.0118	1.1873	0.0214	10.9594	0.0424	< LOD	0.0109	< LOD	0.0073	0.7326	0.015	32.7303	0.0862	0.2965	0.0179	0.0524	0.0098	0.0131	0.0033	0.024	0.0028	< LOD	0.0008	< LOD	0.0013	0.0059	0.0015
5760	09-27-2018 12:40	NAM-MS8	sample	GeoChem	GeoChem Trace	DualSoil	DualSoil	120	Passed	2.1073	1.1188	5.0985	0.323	11.8961	0.2646	< LOD	0.0473	< LOD	0.0221	0.1363	0.0173	0.0986	0.0119	1.1725	0.0214	10.9845	0.0425	< LOD	0.011	< LOD	0.0075	0.7331	0.015	32.8448	0.0864	0.2984	0.0179	0.0496	0.0098	0.0123	0.0033	0.0249	0.0028	< LOD	0.0008	< LOD	0.0014	0.0057	0.0015
5761	09-27-2018 12:43	NAM-MS8	sample	GeoChem	GeoChem Trace	DualSoil	DualSoil	120	Passed	2.1839	1.096	5.1952	0.3209	11.5043	0.2596	< LOD	0.0465	< LOD	0.0221	0.1285	0.0168	0.0961	0.0117	1.1893	0.0213	10.8217	0.042	< LOD	0.0109	< LOD	0.0073	0.7272	0.0148	32.2817	0.0854	0.276	0.0177	0.0532	0.0096	0.0124	0.0032	0.0265	0.0029	< LOD	0.0008	0.0018	0.0014	0.0064	0.0015
5762	09-27-2018 12:46	NAM-MS8	sample	GeoChem	GeoChem Trace	DualSoil	DualSoil	120	Passed	1.9447	1.1182	5.3731	0.3282	11.9227	0.2646	< LOD	0.0473	< LOD	0.022	0.1371	0.0173	0.0994	0.0118	1.211	0.0215	10.9685	0.0423	0.0114	0.011	< LOD	0.0076	0.7539	0.0152	33.0559	0.0866	0.3097	0.0179	0.0462	0.0096	0.0108	0.0032	0.0257	0.0028	< LOD	0.0008	0.0017	0.0013	0.0061	0.0015
5763	09-27-2018 12:51	NAM-MS8	sample	GeoChem	GeoChem Trace	DualSoil	DualSoil	120	Passed	1.7556	1.125	4.9723	0.3216	11.8823	0.2647	< LOD	0.0468	< LOD	0.0223	0.122	0.0171	0.0948	0.0118	1.1983	0.0215	10.9723	0.0424	< LOD	0.0109	< LOD	0.0074	0.7358	0.015	32.7905	0.0863	0.3013	0.0179	0.0488	0.0101	0.0115	0.0033	0.0252	0.0029	< LOD	0.0008	< LOD	0.0014	0.0063	0.0016
5764	09-27-2018 12:54	NAM-MS18	sample	GeoChem	GeoChem Trace	DualSoil	DualSoil	120	Passed	1.6645	0.9288	6.5515	0.2949	67.6021	0.5878	0.356	0.0421	< LOD	0.0138	0.6318	0.023	0.829	0.0163	3.5309	0.0283	1.6727	0.0128	0.0034	0.0023	< LOD	0.0026	0.4209	0.012	7.703	0.039	0.0047	0.0006	0.0096	0.0029	0.0043	0.0016	0.0186	0.0017	< LOD	0.0007	< LOD	0.0007	0.0025	0.0007
5765	09-27-2018 12:57	NAM-MS18	sample	GeoChem	GeoChem Trace	DualSoil	DualSoil	120	Passed	1.3316	0.9014	6.5692	0.2961	67.8092	0.5893	0.3931	0.0424	< LOD	0.0137	0.6265	0.0229	0.81	0.0162	3.483	0.0282	1.7038	0.0129	0.0031	0.0023	< LOD	0.0026	0.4421	0.0122	7.8205	0.0393	0.0042	0.0006	0.0099	0.0028	0.0058	0.0016	0.0185	0.0017	< LOD	0.0007	0.0009	0.0007	0.0025	0.0007
5766	09-27-2018 13:00	NAM-MS18	sample	GeoChem	GeoChem Trace	DualSoil	DualSoil	120	Passed	1.7358	0.8577	6.8545	0.2966	67.9965	0.5896	0.4301	0.0416	0.0308	0.0133	0.6144	0.0228	0.8387	0.0162	3.4947	0.0281	1.6735	0.0127	0.0055	0.0022	< LOD	0.0025	0.4529	0.0124	7.8287	0.0393	0.0037	0.0005	0.0111	0.0029	0.0052	0.0015	0.0201	0.0017	< LOD	0.0007	< LOD	0.0007	0.0027	0.0007
5767	09-27-2018 13:03	NAM-MS18	sample	GeoChem	GeoChem Trace	DualSoil	DualSoil	120	Passed	1.655	0.8917	6.7321	0.296	67.9584	0.5897	0.4201	0.0416	0.0271	0.0133	0.6424	0.0229	0.8433	0.0162	3.4842	0.0281	1.6826	0.0128	0.005	0.0022	0.003	0.0025	0.4438	0.0122	7.7694	0.0392	0.0044	0.0006	0.0107	0.0027	0.0071	0.0015	0.0195	0.0017	< LOD	0.0007	0.0008	0.0007	0.0024	0.0007
5768	09-27-2018 13:06	NAM-MS18	sample	GeoChem	GeoChem Trace	DualSoil	DualSoil	120	Passed	1.6916	0.871	6.6596	0.2945	67.7227	0.5881	0.381	0.0412	< LOD	0.0131	0.6089	0.0226	0.8262	0.0161	3.5648	0.0284	1.6444	0.0127	0.006	0.0022	< LOD	0.0025	0.4491	0.0123	7.7761	0.0392	0.004	0.0006	0.0096	0.0028	0.0053	0.0016	0.0191	0.0017	< LOD	0.0007	< LOD	0.0007	0.0027	0.0007
5769	09-27-2018 13:13	NAM-MS46	sample	GeoChem	GeoChem Trace	DualSoil	DualSoil	120	Passed	1.9109	1.0048	8.8363	0.348	52.2518	0.5212	0.3802	0.0454	< LOD	0.015	0.1332	0.0187	0.51	0.0146	3.6279	0.0301	2.4413	0.0167	0.0047	0.0036	< LOD	0.0037	0.9078	0.017	15.3237	0.0555	0.0341	0.0039	0.0189	0.0043	0.0062	0.002	0.0268	0.0022	< LOD	0.0008	< LOD	0.0008	0.0021	0.0009
5770	09-27-2018 13:17	NAM-MS46	sample	GeoChem	GeoChem Trace	DualSoil	DualSoil	120	Passed	2.0502	0.9807	8.6687	0.343	50.9262	0.5122	0.3356	0.0445	< LOD	0.0152	0.1095	0.0181	0.5165	0.0146	3.5435	0.0298	2.4253	0.0167	0.0073	0.0037	< LOD	0.0037	0.8742	0.0167	15.0948	0.055	0.0303	0.0041	0.0173	0.0042	0.009	0.0021	0.0249	0.0022	< LOD	0.0008	< LOD	0.0009	0.0016	0.0009
5771	09-27-2018 13:21	NAM-MS46	sample	GeoChem	GeoChem Trace	DualSoil	DualSoil	120	Passed	1.7288	0.9721	9.2454	0.3531	52.225	0.5208	0.4111	0.0454	< LOD	0.0151	0.1162	0.0187	0.5234	0.0147	3.5589	0.0299	2.3652	0.0164	0.0077	0.0036	< LOD	0.0038	0.8798	0.0167	15.3987	0.0555	0.0365	0.0039	0.0191	0.0041	0.0074	0.002	0.0241	0.0021	< LOD	0.0007	0.001	0.0008	0.002	0.0009
5772	09-27-2018 13:23	NAM-MS46	sample	GeoChem	GeoChem Trace	DualSoil	DualSoil	120	Passed	2.314	0.9631	9.2241	0.3517	51.6781	0.5174	0.3855	0.0455	< LOD	0.0151	0.1362	0.0186	0.5239	0.0146	3.5496	0.0297	2.3837	0.0164	0.0106	0.0036	< LOD	0.0036	0.8886	0.0167	15.2772	0.0553	0.0367	0.004	0.0184	0.0041	0.0088	0.0021	0.0254	0.0021	< LOD	0.0007	< LOD	0.0008	0.0018	0.0009
5773	09-27-2018 13:26	NAM-MS46	sample	GeoChem	GeoChem Trace	DualSoil	DualSoil	120	Passed	2.2023	0.991	9.2872	0.353	52.3254	0.5215	0.3994	0.0457	< LOD	0.0149	0.1195	0.0189	0.5187	0.0147	3.5417	0.0298	2.4062	0.0165	0.0058	0.0036	< LOD	0.0037	0.8939	0.0168	15.3557	0.0554	0.0373	0.0039	0.0167	0.0041	0.0073	0.002	0.0247	0.0021	< LOD	0.0007	< LOD	0.0008	0.0015	0.0009
5774	09-27-2018 13:30	NAM-MS35	sample	GeoChem	GeoChem Trace	DualSoil	DualSoil	120	Passed	< LOD	0.6971	6.4397	0.2724	80.3723	0.6386	0.2754	0.0291	0.0242	0.0107	0.3584	0.019	1.7038	0.0206	2.1782	0.0217	0.2857	0.0053	< LOD	0.0009	0.0068	0.0016	0.1138	0.0065	1.8889	0.0187	0	0	< LOD	0.0014	0.0035	0.0008	0.0087	0.0009	< LOD	0.0005	< LOD	0.0005	0.0058	0.0005
5775	09-27-2018 13:33	NAM-MS35	sample	GeoChem	GeoChem Trace	DualSoil	DualSoil	120	Passed	< LOD	0.7252	6.6711	0.2767	80.7715	0.6413	0.3045	0.0296	0.0338	0.0107	0.3763	0.0194	1.7304	0.0207	2.2013	0.0217	0.2758	0.0052	0.0013	0.0009	0.0078	0.0016	0.1105	0.0064	1.826	0.0184	0	0	< LOD	0.0014	0.0042	0.0008	0.0077	0.0009	< LOD	0.0005	< LOD	0.0005	0.0059	0.0005
5776	09-27-2018 13:36	NAM-MS35	sample	GeoChem	GeoChem Trace	DualSoil	DualSoil	120	Passed	0.7413	0.7315	6.653	0.2765	80.7959	0.6411	0.2639	0.0287	0.0315	0.0107	0.3734	0.0192	1.7154	0.0206	2.1779	0.0216	0.265	0.0051	0.0016	0.0009	0.009	0.0016	0.1103	0.0064	1.8607	0.0186	0	0	< LOD	0.0014	0.0041	0.0008	0.008	0.0009	< LOD	0.0005	< LOD	0.0005	0.0056	0.0005
5777	09-27-2018 13:39	NAM-MS35	sample	GeoChem	GeoChem Trace	DualSoil	DualSoil	120	Passed	< LOD	0.7212	6.3725	0.2723	80.9669	0.6422	0.2794	0.0288	0.0309	0.0106	0.3684	0.0192	1.7299	0.0207	2.1941	0.0217	0.2673	0.0051	0.0021	0.0009	0.0083	0.0016	0.1152	0.0065	1.8506	0.0185	0	0	< LOD	0.0014	0.0039	0.0008	0.0083	0.0009	< LOD	0.0005	< LOD	0.0005	0.0057	0.0005
5778	09-27-2018 13:42	NAM-MS35	sample	GeoChem	GeoChem Trace	DualSoil	DualSoil	120	Passed	0.8089	0.6999	6.5768	0.2742	81.1619	0.6433	0.2924	0.029	0.0253	0.0104	0.3625	0.0194	1.7282	0.0207	2.2042	0.0217	0.261	0.0051	0.0017	0.0009	0.0076	0.0016	0.1072	0.0063	1.8223	0.0184	0	0	< LOD	0.0014	0.0041	0.0008	0.008	0.0009	< LOD	0.0005	< LOD	0.0005	0.0056	0.0005
5779	09-27-2018 13:49	CGL002 CRM3	CRM	GeoChem	GeoChem Trace	DualSoil	DualSoil	120	Passed	< LOD	0.6651	15.4751	0.3699	67.1587	0.5525	0.0391	0.0178	< LOD	0.0104	< LOD	0.0138	3.3777	0.0277	0.4785	0.012	0.0025	0.0024	< LOD	0.0012	0.0217	0.0017	0.1278	0.0067	0.3346	0.008	0	0	< LOD	0.0011	0.002	0.0006	0.0092	0.0008	< LOD	0.0005	< LOD	0.0004	0.2385	0.0019
5780	09-27-2018 13:52	CGL002 CRM3	CRM	GeoChem	GeoChem Trace	DualSoil	DualSoil	120	Passed	< LOD	0.6929	15.6516	0.3726	67.4784	0.5542	0.0334	0.0181	< LOD	0.0105	< LOD	0.0139	3.3573	0.0276	0.4867	0.0121	< LOD	0.0023	< LOD	0.0012	0.0223	0.0016	0.1319	0.0068	0.3247	0.0078	0	0	< LOD	0.0011	0.0021	0.0006	0.009	0.0008	< LOD	0.0005	< LOD	0.0004	0.2395	0.0019
5781	09-27-2018 13:55	CGL002 CRM3	CRM	GeoChem	GeoChem Trace	DualSoil	DualSoil	120	Passed	< LOD	0.6946	15.4833	0.3703	67.2842	0.553	0.0409	0.0182	< LOD	0.0104	< LOD	0.0139	3.2954	0.0274	0.5017	0.0122	< LOD	0.0024	< LOD	0.0012	0.0203	0.0017	0.1304	0.0067	0.3114	0.0077	0	0	< LOD	0.0011	0.0022	0.0007	0.0093	0.0008	< LOD	0.0005	< LOD	0.0004	0.248	0.0019
5782	09-27-2018 13:58	CGL002 CRM3	CRM	GeoChem	GeoChem Trace	DualSoil	DualSoil	120	Passed	< LOD	0.6969	15.9712	0.3751	67.6213	0.5547	0.0412	0.0173	< LOD	0.0104	< LOD	0.014	3.3347	0.0275	0.5026	0.0122	< LOD	0.0023	< LOD	0.0012	0.0212	0.0016	0.1295	0.0066	0.3237	0.0078	0	0	< LOD	0.0011	0.0026	0.0006	0.009	0.0008	< LOD	0.0005	< LOD	0.0004	0.242	0.0019
5783	09-27-2018 14:01	CGL002 CRM3	CRM	GeoChem	GeoChem Trace	DualSoil	DualSoil	121	Passed	< LOD	0.6806	15.7664	0.3697	67.4393	0.5491	0.0349	0.0177	< LOD	0.0104	< LOD	0.014	3.314	0.0272	0.4884	0.012	< LOD	0.0023	< LOD	0.0012	0.0215	0.0016	0.1265	0.0066	0.3132	0.0077	0	0	< LOD	0.001	0.002	0.0006	0.0086	0.0007	< LOD	0.0005	< LOD	0.0003	0.2358	0.0018
5784	09-27-2018 14:06	NAM-MS10	cal sample	GeoChem	GeoChem Trace	DualSoil	DualSoil	120	Passed	1.9053	1.1173	9.7002	0.3774	33.9918	0.4235	< LOD	0.0413	< LOD	0.018	0.2395	0.019	0.2591	0.0129	2.5627	0.0272	5.1452	0.0257	< LOD	0.0063	< LOD	0.0047	1.31	0.0199	21.3971	0.0665	0.0852	0.009	0.026	0.0054	0.0089	0.0022	0.0286	0.0024	< LOD	0.0007	< LOD	0.0009	0.0021	0.001
5785	09-27-2018 14:10	NAM-MS10	cal sample	GeoChem	GeoChem Trace	DualSoil	DualSoil	122	Passed	1.6844	1.0667	10.0021	0.3757	34.2291	0.4183	< LOD	0.0406	< LOD	0.0177	0.2323	0.0185	0.2725	0.0128	2.5832	0.0268	5.1965	0.0254	< LOD	0.0062	< LOD	0.0047	1.312	0.0199	21.3941	0.0665	0.0854	0.0088	0.024	0.0052	0.0085	0.0022	0.0287	0.0023	< LOD	0.0007	< LOD	0.0009	0.0021	0.001
5786	09-27-2018 14:14	NAM-MS10	cal sample	GeoChem	GeoChem Trace		DualSoil	120	Passed	2.1221	1.1147	9.531	0.3746	33.7395	0.4216	< LOD	0.0415	< LOD	0.0182	0.2162	0.0185	0.2554	0.0129	2.5552	0.0271	5.0887	0.0256	< LOD	0.0063	< LOD	0.0047	1.3182	0.0199	21.2022	0.0661	0.0845	0.009	0.0265	0.0055	0.009	0.0023	0.0273	0.0023	< LOD	0.0007	< LOD	0.001	0.0025	0.001
5787	09-27-2018 14:16	NAM-MS10	cal sample	GeoChem	GeoChem Trace	DualSoil	DualSoil	120	Passed	1.9979	1.1477	9.8877	0.3803	34.0239	0.4238	< LOD	0.042	< LOD	0.0179	0.2248	0.0188	0.2471	0.0131	2.5573	0.0273	5.173	0.0258	< LOD	0.0064	< LOD	0.0049	1.3155	0.0199	21.3621	0.0664	0.0903	0.0089	0.0263	0.0056	0.0086	0.0023	0.0296	0.0024	< LOD	0.0007	< LOD	0.0009	0.0021	0.001
5788	09-27-2018 14:19	NAM-MS10	cal sample	GeoChem	GeoChem Trace	DualSoil	DualSoil	120	Passed	1.7228	1.1274	9.9122	0.3809	34.2694	0.4252	< LOD	0.0419	< LOD	0.0179	0.2199	0.0188	0.2699	0.013	2.5817	0.0272	5.1621	0.0257	< LOD	0.0063	< LOD	0.0047	1.3044	0.0199	21.316	0.0664	0.0933	0.0089	0.0265	0.006	0.0092	0.0025	0.0305	0.0026	< LOD	0.0008	< LOD	0.001	0.0029	0.0011
5789	09-27-2018 14:23	NAM-MS7	sample	GeoChem	GeoChem Trace	DualSoil	DualSoil	121	Passed	< LOD	1.0008	7.3335	0.3388	43.5508	0.4793	< LOD	0.0384	< LOD	0.0167	0.0749	0.0183	0.6039	0.016	1.7807	0.023	4.8991	0.0244	0.0092	0.0053	< LOD	0.0047	0.8447	0.0162	21.41	0.066	0.0884	0.007	0.0223	0.0055	0.0076	0.0024	0.0211	0.0023	< LOD	0.0008	< LOD	0.001	0.0036	0.001
5790	09-27-2018 14:26	NAM-MS7	sample	GeoChem	GeoChem Trace	DualSoil	DualSoil	120	Passed	< LOD	1.0509	7.6367	0.3483	43.4821	0.4833	< LOD	0.039	< LOD	0.0167	0.0803	0.0185	0.5996	0.0162	1.7796	0.0232	4.8921	0.0246	0.0065	0.0054	< LOD	0.005	0.8486	0.0163	21.5896	0.0663	0.0935	0.007	0.0326	0.006	0.0095	0.0025	0.0224	0.0024	< LOD	0.0008	< LOD	0.001	0.0036	0.0011
5791	09-27-2018 14:29	NAM-MS7	sample	GeoChem	GeoChem Trace	DualSoil	DualSoil	120	Passed	1.8347	0.99	7.5647	0.3428	43.701	0.4841	< LOD	0.0386	< LOD	0.0166	0.0856	0.0187	0.6034	0.0161	1.7707	0.0231	4.9041	0.0246	0.009	0.0053	< LOD	0.0047	0.8459	0.0162	21.4923	0.0661	0.0908	0.0069	0.0245	0.0057	0.0087	0.0025	0.0218	0.0024	< LOD	0.0008	0.0014	0.001	0.0037	0.0011
5792	09-27-2018 14:31	NAM-MS7	sample	GeoChem	GeoChem Trace	DualSoil	DualSoil	120	Passed	1.3448	1.0089	7.6267	0.3457	43.6036	0.4842	< LOD	0.0392	< LOD	0.017	0.0833	0.0188	0.5982	0.0161	1.7683	0.0231	4.8894	0.0246	0.0126	0.0053	< LOD	0.0047	0.8439	0.0162	21.5655	0.0662	0.0948	0.007	0.0269	0.0059	0.0082	0.0025	0.021	0.0024	< LOD	0.0008	< LOD	0.001	0.0038	0.0011
5793	09-27-2018 14:34	NAM-MS7	sample	GeoChem	GeoChem Trace	DualSoil	DualSoil	120	Passed	1.1479	1.0279	7.7081	0.3492	43.6851	0.4851	< LOD	0.0391	< LOD	0.0169	0.0871	0.0189	0.5956	0.0161	1.7804	0.0233	4.8869	0.0246	0.0109	0.0053	< LOD	0.0048	0.8557	0.0163	21.7486	0.0665	0.0937	0.007	0.026	0.0057	0.0095	0.0025	0.0226	0.0023	< LOD	0.0008	< LOD	0.001	0.0033	0.0011
5794	09-27-2018 14:39	NAM-MS17	sample	GeoChem	GeoChem Trace	DualSoil	DualSoil	120	Passed	0.7977	0.7067	5.9291	0.2647	81.0761	0.6452	0.2813	0.0292	< LOD	0.0101	0.0486	0.0156	1.1686	0.0175	2.3108	0.0223	0.3339	0.0057	< LOD	0.0009	0.0083	0.0017	0.1513	0.0073	2.4745	0.0214	0	0	< LOD	0.0015	0.004	0.0009	0.0096	0.001	< LOD	0.0005	< LOD	0.0005	0.0044	0.0005
5795	09-27-2018 14:42	NAM-MS17	sample	GeoChem	GeoChem Trace	DualSoil	DualSoil	120	Passed	< LOD	0.7123	5.9039	0.2655	81.1681	0.6465	0.2908	0.0296	0.0112	0.0101	0.0521	0.0156	1.1604	0.0175	2.3532	0.0225	0.3456	0.0058	0.0023	0.0009	0.0111	0.0017	0.1583	0.0075	2.5605	0.0218	0	0	< LOD	0.0016	0.0046	0.001	0.0102	0.001	< LOD	0.0005	< LOD	0.0005	0.0043	0.0005
5796	09-27-2018 14:45	NAM-MS17	sample	GeoChem	GeoChem Trace	DualSoil	DualSoil	120	Passed	0.8286	0.7521	5.9159	0.2663	81.1322	0.6458	0.2921	0.0295	< LOD	0.01	0.0531	0.0157	1.178	0.0176	2.3445	0.0224	0.3548	0.0058	0.0015	0.0009	0.01	0.0017	0.1498	0.0073	2.5017	0.0216	0	0	0.0016	0.0016	0.0041	0.0009	0.0105	0.001	< LOD	0.0005	< LOD	0.0005	0.0045	0.0005
5797	09-27-2018 14:47	NAM-MS17	sample	GeoChem	GeoChem Trace	DualSoil	DualSoil	120	Passed	0.8715	0.7256	5.8676	0.2645	81.1504	0.646	0.2992	0.0296	< LOD	0.0099	0.0465	0.0157	1.1564	0.0174	2.368	0.0225	0.3334	0.0057	0.0023	0.0009	0.012	0.0017	0.1519	0.0073	2.5115	0.0216	0	0	< LOD	0.0015	0.0046	0.0009	0.0099	0.001	< LOD	0.0005	< LOD	0.0005	0.0039	0.0005
5798	09-27-2018 14:50	NAM-MS17	sample	GeoChem	GeoChem Trace	DualSoil	DualSoil	121	Passed	1.27	0.7236	5.9967	0.2634	81.3093	0.6417	0.3047	0.0293	< LOD	0.0097	0.0514	0.0157	1.1635	0.0173	2.3516	0.0222	0.3429	0.0057	0.0018	0.0009	0.0088	0.0016	0.1435	0.0072	2.5385	0.0217	0	0	< LOD	0.0016	0.0041	0.0009	0.0106	0.001	< LOD	0.0005	< LOD	0.0005	0.0041	0.0005
5799	09-27-2018 15:09	CRM3	CRM	GeoChem	GeoChem Trace	DualSoil	DualSoil	120	Passed	< LOD	0.6774	15.6931	0.3722	66.9087	0.551	0.0408	0.0175	< LOD	0.0103	< LOD	0.0143	3.4069	0.0278	0.5055	0.0122	< LOD	0.0024	< LOD	0.0012	0.0217	0.0017	0.1279	0.0067	0.3321	0.0079	0	0	< LOD	0.0011	0.0021	0.0006	0.0089	0.0007	< LOD	0.0005	< LOD	0.0003	0.2377	0.0019
5800	09-27-2018 15:11	CRM3	CRM	GeoChem	GeoChem Trace	DualSoil	DualSoil	120	Passed	< LOD	0.6751	16.0531	0.3757	67.4354	0.5538	0.0394	0.0176	< LOD	0.0104	< LOD	0.0144	3.3586	0.0276	0.4842	0.0121	< LOD	0.0023	< LOD	0.0012	0.0214	0.0017	0.1265	0.0066	0.3281	0.0079	0	0	< LOD	0.0011	0.0015	0.0006	0.0092	0.0008	< LOD	0.0005	< LOD	0.0004	0.243	0.0019
5801	09-27-2018 15:16	CRM3	CRM	GeoChem	GeoChem Trace	DualSoil	DualSoil	120	Passed	< LOD	0.6902	15.598	0.3715	67.5882	0.5548	0.035	0.0181	< LOD	0.0104	< LOD	0.0143	3.328	0.0275	0.4893	0.0121	< LOD	0.0023	< LOD	0.0012	0.0203	0.0016	0.1266	0.0066	0.3186	0.0078	0	0	< LOD	0.0011	0.0027	0.0006	0.0089	0.0008	< LOD	0.0005	< LOD	0.0004	0.2396	0.0019
5802	09-27-2018 15:18	CRM3	CRM	GeoChem	GeoChem Trace	DualSoil	DualSoil	120	Passed	< LOD	0.6829	15.9065	0.3749	67.7077	0.5556	0.035	0.018	< LOD	0.0104	< LOD	0.0143	3.3373	0.0275	0.4878	0.0121	< LOD	0.0023	< LOD	0.0012	0.0216	0.0016	0.1274	0.0066	0.3179	0.0078	0	0	< LOD	0.0011	0.0024	0.0006	0.0094	0.0008	< LOD	0.0005	< LOD	0.0004	0.2414	0.0019
5803	09-27-2018 15:21	CRM3	CRM	GeoChem	GeoChem Trace	DualSoil	DualSoil	120	Passed	< LOD	0.6724	15.8632	0.3738	67.6667	0.5552	0.0452	0.0177	< LOD	0.0103	< LOD	0.0143	3.3224	0.0275	0.4993	0.0122	0.003	0.0023	< LOD	0.0012	0.02	0.0016	0.1255	0.0066	0.3148	0.0077	0	0	< LOD	0.001	0.002	0.0006	0.0088	0.0007	< LOD	0.0005	< LOD	0.0003	0.235	0.0018
5804	09-27-2018 15:25	NAM-MS37	cal sample	GeoChem	GeoChem Trace	DualSoil	DualSoil	120	Passed	1.3631	0.7655	6.4924	0.2775	78.9486	0.6361	0.4175	0.0335	0.0129	0.0105	0.1089	0.017	1.2101	0.0179	2.938	0.025	0.4377	0.0065	0.0031	0.0011	0.0081	0.0017	0.1992	0.0083	3.0571	0.024	0	0	< LOD	0.0016	0.0041	0.001	0.012	0.0011	< LOD	0.0005	< LOD	0.0005	0.0041	0.0005
5805	09-27-2018 15:28	NAM-MS37	cal sample	GeoChem	GeoChem Trace	DualSoil	DualSoil	120	Passed	0.9545	0.7503	6.5189	0.2779	79.6267	0.6401	0.4268	0.0338	0.0147	0.0106	0.0906	0.0169	1.226	0.018	2.9292	0.0249	0.4147	0.0063	0.0029	0.0011	0.0096	0.0017	0.1835	0.0081	3.0139	0.0239	0	0	0.0019	0.0016	0.0038	0.0009	0.0128	0.0011	< LOD	0.0005	< LOD	0.0005	0.0044	0.0005
5806	09-27-2018 15:30	NAM-MS37	cal sample	GeoChem	GeoChem Trace	DualSoil	DualSoil	122	Passed	1.0759	0.7016	6.4545	0.2709	79.3198	0.6278	0.4149	0.0329	0.0176	0.0104	0.0922	0.0166	1.2119	0.0176	2.9393	0.0246	0.4343	0.0063	0.0033	0.001	0.0114	0.0017	0.1961	0.0083	3.0617	0.0241	0	0	0.0028	0.0017	0.0046	0.001	0.0118	0.0011	< LOD	0.0005	< LOD	0.0005	0.0042	0.0005
5807	09-27-2018 15:33	NAM-MS37	cal sample	GeoChem	GeoChem Trace	DualSoil	DualSoil	120	Passed	< LOD	0.7259	6.4086	0.2758	79.239	0.6378	0.4076	0.0335	< LOD	0.0105	0.0921	0.0167	1.2219	0.018	2.954	0.0251	0.4278	0.0064	0.0037	0.0011	0.0099	0.0018	0.2017	0.0083	3.0659	0.0241	0	0	0.0022	0.0016	0.0046	0.0009	0.0128	0.0011	< LOD	0.0005	< LOD	0.0005	0.0039	0.0005
5808	09-27-2018 15:36	NAM-MS37	cal sample	GeoChem	GeoChem Trace	DualSoil	DualSoil	120	Passed	< LOD	0.7772	6.4741	0.2788	79.3358	0.6387	0.4338	0.034	0.0136	0.0105	0.0917	0.0168	1.2229	0.018	2.9487	0.025	0.4351	0.0064	0.0033	0.0011	0.0096	0.0018	0.1964	0.0082	3.0466	0.024	0	0	0.0023	0.0016	0.0049	0.001	0.0128	0.0011	0.0005	0.0005	< LOD	0.0005	0.0042	0.0005
5809	09-27-2018 15:40	NAM-MS19	cal sample	GeoChem	GeoChem Trace	DualSoil	DualSoil	120	Passed	1.1671	0.9144	8.175	0.3253	66.0195	0.5869	0.3925	0.0381	< LOD	0.0126	0.0852	0.018	0.6537	0.0149	3.3934	0.0281	1.0733	0.0106	0.0071	0.002	< LOD	0.0027	0.6657	0.0146	10.6829	0.0454	0.0075	0.0009	0.0108	0.0028	0.0069	0.0015	0.0223	0.0017	< LOD	0.0006	< LOD	0.0007	0.002	0.0007
5810	09-27-2018 15:43	NAM-MS19	cal sample	GeoChem	GeoChem Trace	DualSoil	DualSoil	120	Passed	1.7466	0.9026	8.6238	0.3296	65.8385	0.5859	0.4366	0.0387	< LOD	0.0124	0.0814	0.018	0.6482	0.0149	3.4015	0.0281	1.0651	0.0105	0.0076	0.0021	< LOD	0.0027	0.671	0.0146	10.7147	0.0454	0.0076	0.0009	0.0117	0.0028	0.0065	0.0014	0.0224	0.0017	< LOD	0.0006	< LOD	0.0007	0.0025	0.0007
5811	09-27-2018 15:46	NAM-MS19	cal sample	GeoChem	GeoChem Trace	DualSoil	DualSoil	121	Passed	1.7329	0.8624	8.6222	0.3265	66.6431	0.5859	0.4213	0.0385	< LOD	0.0125	0.079	0.0181	0.6531	0.0148	3.3735	0.0278	1.0472	0.0103	0.0073	0.002	< LOD	0.0027	0.6789	0.0147	10.7354	0.0455	0.0066	0.0008	0.0097	0.0028	0.007	0.0015	0.022	0.0017	< LOD	0.0007	< LOD	0.0007	0.0023	0.0007
5812	09-27-2018 15:49	NAM-MS19	cal sample	GeoChem	GeoChem Trace	DualSoil	DualSoil	121	Passed	1.5759	0.8799	8.5597	0.3264	66.4454	0.5849	0.408	0.0383	< LOD	0.0125	0.0886	0.0182	0.6532	0.0149	3.4012	0.0279	1.055	0.0104	0.0069	0.002	0.003	0.0027	0.6765	0.0147	10.7588	0.0456	0.0067	0.0008	0.0107	0.0028	0.0063	0.0015	0.0219	0.0017	< LOD	0.0006	< LOD	0.0007	0.0022	0.0007
5813	09-27-2018 15:52	NAM-MS19	cal sample	GeoChem	GeoChem Trace	DualSoil	DualSoil	120	Passed	1.5048	0.9024	8.7684	0.3321	67.2021	0.5943	0.4068	0.0385	< LOD	0.0124	0.0823	0.0185	0.6682	0.0151	3.3971	0.0281	1.053	0.0104	0.0057	0.002	< LOD	0.0027	0.6794	0.0147	10.7304	0.0455	0.0057	0.0006	0.0093	0.0028	0.0065	0.0015	0.0226	0.0017	< LOD	0.0007	< LOD	0.0007	0.0023	0.0007
5815	09-27-2018 16:02	NAM-MS4	sample	GeoChem	GeoChem Trace	DualSoil	DualSoil	120	Passed	2.1455	1.1286	3.0254	0.259	8.679	0.2209	< LOD	0.0535	< LOD	0.0265	0.8408	0.0176	0.0393	0.0103	1.0106	0.019	7.3003	0.034	0.0331	0.0092	< LOD	0.0066	0.4785	0.0123	29.4537	0.0794	0.1374	0.0189	0.0646	0.0107	0.0203	0.0041	0.0179	0.0027	< LOD	0.0009	< LOD	0.0013	0.0072	0.0017
5816	09-27-2018 16:27	NAM-MS4	sample	GeoChem	GeoChem Trace	DualSoil	DualSoil	120	Passed	1.8743	1.2606	3.2233	0.2632	9.4512	0.2278	< LOD	0.0537	< LOD	0.0259	0.8661	0.017	0.0542	0.0102	0.9895	0.0187	7.0835	0.0333	0.041	0.009	< LOD	0.0061	0.5102	0.0127	28.7873	0.0783	0.154	0.0187	0.0626	0.0105	0.0231	0.0042	0.018	0.0027	< LOD	0.001	< LOD	0.0014	0.0059	0.0017
5817	09-27-2018 16:49	NAM-MS4	sample	GeoChem	GeoChem Trace	DualSoil	DualSoil	120	Passed	1.8031	1.2752	3.3424	0.2673	9.6743	0.2311	< LOD	0.0551	< LOD	0.0263	0.9317	0.0174	0.0546	0.0103	1.1387	0.0197	6.7031	0.0324	0.0297	0.0088	< LOD	0.0067	0.5378	0.013	28.6514	0.0779	0.1247	0.0185	0.0642	0.0107	0.02	0.0041	0.0167	0.0026	< LOD	0.0009	< LOD	0.0013	0.0068	0.0016
5818	09-27-2018 16:51	NAM-MS4	sample	GeoChem	GeoChem Trace	DualSoil	DualSoil	120	Passed	2.7547	1.2255	3.8168	0.2699	10.7377	0.2384	< LOD	0.0527	< LOD	0.025	0.9619	0.0179	0.0607	0.0102	1.2262	0.0202	6.5429	0.0317	0.034	0.0085	< LOD	0.0059	0.54	0.0131	27.9265	0.0768	0.107	0.0177	0.0584	0.0099	0.0218	0.004	0.0183	0.0025	< LOD	0.0009	< LOD	0.0012	0.0064	0.0015
5819	09-27-2018 17:02	NAM-MS4	sample	GeoChem	GeoChem Trace	DualSoil	DualSoil	123	Passed	2.1497	1.1847	3.9783	0.2708	10.9526	0.2371	< LOD	0.0523	< LOD	0.0254	0.9221	0.0172	0.0487	0.0099	1.2411	0.0198	5.9915	0.0297	0.0314	0.0081	0.0245	0.0067	0.5652	0.0134	27.8042	0.0763	0.0806	0.0177	0.0639	0.0101	0.0184	0.0038	0.0217	0.0026	< LOD	0.0009	< LOD	0.0013	0.0059	0.0015
5820	09-27-2018 17:07	NAM-MS9	sample	GeoChem	GeoChem Trace	DualSoil	DualSoil	120	Passed	2.676	1.2058	2.8363	0.2496	6.607	0.1961	< LOD	0.043	< LOD	0.0248	0.6934	0.0161	0.045	0.0101	0.6313	0.0162	8.6342	0.0371	< LOD	0.0099	< LOD	0.007	0.5751	0.0132	30.9392	0.0814	0.196	0.0198	0.0541	0.0101	0.0142	0.0034	0.0183	0.0026	< LOD	0.0008	< LOD	0.0013	0.0072	0.0016
5821	09-27-2018 17:10	NAM-MS9	sample	GeoChem	GeoChem Trace	DualSoil	DualSoil	121	Passed	2.1073	1.091	3.6529	0.2583	8.0179	0.206	< LOD	0.0437	< LOD	0.0233	0.7512	0.0152	0.0838	0.0096	0.7777	0.0166	7.8988	0.0346	0.0355	0.0092	< LOD	0.0062	0.6915	0.0145	29.3876	0.079	0.1433	0.0189	0.0502	0.0096	0.0126	0.0033	0.0204	0.0026	< LOD	0.0008	< LOD	0.0013	0.0071	0.0016
5822	09-27-2018 17:13	NAM-MS9	sample	GeoChem	GeoChem Trace	DualSoil	DualSoil	120	Passed	1.6881	1.1032	3.4846	0.264	7.9042	0.2089	< LOD	0.0404	< LOD	0.0237	0.7166	0.0161	0.0892	0.0101	0.7542	0.0169	7.8541	0.0351	0.0406	0.0093	< LOD	0.0062	0.6076	0.0137	31.1551	0.0816	0.186	0.0195	0.0562	0.0104	0.0151	0.0035	0.0267	0.003	< LOD	0.0009	< LOD	0.0013	0.0083	0.0017
5823	09-27-2018 17:15	NAM-MS9	sample	GeoChem	GeoChem Trace	DualSoil	DualSoil	121	Passed	2.0623	1.1786	3.5784	0.2678	7.8415	0.2103	< LOD	0.0448	< LOD	0.0251	0.7344	0.0157	0.055	0.0103	0.8262	0.0175	8.0296	0.0352	< LOD	0.0095	< LOD	0.0064	0.6856	0.0145	30.1964	0.0804	0.1791	0.0192	0.0474	0.0098	0.0112	0.0034	0.0224	0.0028	< LOD	0.0008	< LOD	0.0012	0.0071	0.0016
5824	09-27-2018 17:22	NAM-MS9	sample	GeoChem	GeoChem Trace	DualSoil	DualSoil	120	Passed	2.5229	1.2255	3.0441	0.2566	7.78	0.2101	< LOD	0.0419	< LOD	0.0246	0.6898	0.0161	0.0617	0.0104	0.7143	0.0168	8.0857	0.0359	0.0122	0.0096	< LOD	0.0065	0.5783	0.0133	31.108	0.0816	0.2108	0.0197	0.0609	0.0106	0.0147	0.0035	0.0214	0.0028	< LOD	0.0008	< LOD	0.0013	0.0076	0.0017
5825	09-27-2018 17:26	NAM-MS37	cal sample	GeoChem	GeoChem Trace	DualSoil	DualSoil	120	Passed	2.7027	1.2147	5.4858	0.2759	38.6968	0.4251	0.39	0.0445	< LOD	0.0184	0.6467	0.0174	0.1888	0.0109	3.2789	0.0281	3.5901	0.0205	< LOD	0.0049	< LOD	0.0033	0.5781	0.0136	10.336	0.0459	< LOD	0.0057	0.011	0.0026	0.004	0.0012	0.0182	0.0013	< LOD	0.0004	< LOD	0.0005	0.0029	0.0006
5826	09-27-2018 17:28	NAM-MS37	cal sample	GeoChem	GeoChem Trace	DualSoil	DualSoil	120	Passed	2.9181	1.066	5.428	0.2675	41.296	0.4377	0.546	0.0438	0.0592	0.0172	0.6759	0.0169	0.2911	0.0114	3.3215	0.0279	3.3604	0.0196	< LOD	0.0046	0.0047	0.0034	0.5514	0.0133	9.8942	0.0449	< LOD	0.0051	0.011	0.0025	0.0039	0.0011	0.0143	0.0012	< LOD	0.0004	< LOD	0.0005	0.0031	0.0006
5827	09-27-2018 17:31	NAM-MS37	cal sample	GeoChem	GeoChem Trace	DualSoil	DualSoil	120	Passed	2.5937	1.0819	5.6613	0.2729	41.4041	0.4388	0.6428	0.0449	< LOD	0.0169	0.6756	0.0182	0.1998	0.0105	3.4491	0.0285	3.4864	0.0199	< LOD	0.0045	0.0177	0.0033	0.5469	0.0133	9.9503	0.0451	< LOD	0.0051	0.008	0.0024	0.0035	0.0011	0.0144	0.0012	< LOD	0.0004	< LOD	0.0005	0.0026	0.0006
5828	09-27-2018 17:34	NAM-MS37	cal sample	GeoChem	GeoChem Trace	DualSoil	DualSoil	120	Passed	2.3011	0.9789	5.6316	0.2683	44.0513	0.451	0.5397	0.0412	0.0572	0.0161	0.6765	0.0171	0.33	0.0116	3.3245	0.0277	3.0512	0.0184	< LOD	0.0042	< LOD	0.0028	0.483	0.0125	8.8822	0.0424	< LOD	0.0043	0.006	0.0022	0.0029	0.001	0.0137	0.0011	< LOD	0.0004	< LOD	0.0004	0.0033	0.0006
5829	09-27-2018 17:36	NAM-MS37	cal sample	GeoChem	GeoChem Trace	DualSoil	DualSoil	120	Passed	2.1661	0.9569	5.5965	0.2628	49.4047	0.4763	0.377	0.0364	0.0723	0.0152	0.6289	0.0172	0.4306	0.0122	3.2702	0.027	2.3884	0.0159	< LOD	0.0034	< LOD	0.0024	0.408	0.0115	7.3981	0.0384	< LOD	0.0032	0.0045	0.002	0.0036	0.0009	0.0112	0.001	< LOD	0.0004	< LOD	0.0004	0.0041	0.0006
5830	09-27-2018 17:40	NAM-MS19	cal sample	GeoChem	GeoChem Trace	DualSoil	DualSoil	121	Passed	3.0725	1.2282	7.9945	0.33	21.3193	0.3205	< LOD	0.0422	< LOD	0.0203	0.6494	0.0155	0.1021	0.0101	2.0181	0.0234	3.7259	0.0222	< LOD	0.0062	< LOD	0.0042	0.9022	0.0165	20.0832	0.0632	< LOD	0.012	0.0299	0.0054	0.0087	0.0021	0.0235	0.0021	< LOD	0.0006	< LOD	0.0007	0.0033	0.001
5831	09-27-2018 17:42	NAM-MS19	cal sample	GeoChem	GeoChem Trace	DualSoil	DualSoil	120	Passed	3.1056	1.1963	7.4151	0.3223	25.448	0.3514	0.0762	0.0431	< LOD	0.0206	0.747	0.0181	0.0976	0.0103	2.0641	0.0238	3.445	0.0212	< LOD	0.0057	< LOD	0.0041	0.9385	0.0168	18.5813	0.0605	< LOD	0.0106	0.0222	0.0046	0.0061	0.0018	0.0255	0.002	< LOD	0.0006	< LOD	0.0007	0.0027	0.0009
5832	09-27-2018 17:45	NAM-MS19	cal sample	GeoChem	GeoChem Trace	DualSoil	DualSoil	120	Passed	2.782	1.1607	7.4142	0.3174	28.928	0.3722	0.1514	0.0411	< LOD	0.0194	0.7622	0.0173	0.2948	0.0125	2.2701	0.0246	3.0537	0.0197	< LOD	0.0052	< LOD	0.004	0.8428	0.016	17.2806	0.0582	< LOD	0.0094	0.0184	0.0042	0.0068	0.0017	0.0239	0.0019	< LOD	0.0005	< LOD	0.0007	0.0029	0.0009
5833	09-27-2018 17:48	NAM-MS19	cal sample	GeoChem	GeoChem Trace	DualSoil	DualSoil	120	Passed	1.9709	1.1079	7.2809	0.3169	27.2951	0.3626	0.1263	0.0402	< LOD	0.0192	0.7696	0.0179	0.2167	0.0111	2.0717	0.0236	3.4226	0.021	0.0065	0.0055	< LOD	0.0041	0.9122	0.0166	18.5334	0.0605	< LOD	0.0103	0.024	0.0045	0.0063	0.0017	0.0229	0.0019	< LOD	0.0006	< LOD	0.0007	0.0039	0.0009
5834	09-27-2018 17:50	NAM-MS19	cal sample	GeoChem	GeoChem Trace	DualSoil	DualSoil	120	Passed	2.1658	1.1703	7.4869	0.3246	25.0746	0.3491	0.1063	0.0444	< LOD	0.0204	0.7161	0.0175	0.2838	0.0126	2.211	0.0246	3.3836	0.0211	< LOD	0.0057	< LOD	0.0044	0.8116	0.0157	18.6553	0.0608	< LOD	0.0107	0.0243	0.0048	0.0067	0.0019	0.0248	0.0021	< LOD	0.0006	< LOD	0.0008	0.0038	0.001
5835	09-27-2018 17:54	NAM-MS16	sample	GeoChem	GeoChem Trace	DualSoil	DualSoil	120	Passed	2.4574	0.9918	6.1312	0.2749	41.759	0.4357	0.5709	0.0419	0.1326	0.0177	0.8451	0.0175	0.4665	0.0128	3.613	0.0286	2.2933	0.016	< LOD	0.0039	< LOD	0.0026	0.4883	0.0125	8.1381	0.0404	< LOD	0.0045	0.0052	0.0022	0.0029	0.001	0.014	0.0012	< LOD	0.0004	< LOD	0.0004	0.0032	0.0006
5836	09-27-2018 17:57	NAM-MS16	sample	GeoChem	GeoChem Trace	DualSoil	DualSoil	121	Passed	2.9461	1.0402	5.6144	0.2683	39.9052	0.4244	0.6703	0.0458	0.1661	0.0186	0.9959	0.0183	0.461	0.0129	3.8161	0.0293	2.5982	0.0172	< LOD	0.0041	< LOD	0.0029	0.5662	0.0135	9.502	0.044	< LOD	0.0052	0.0108	0.0025	0.0044	0.0011	0.0157	0.0013	< LOD	0.0005	< LOD	0.0005	0.0032	0.0006
5837	09-27-2018 18:04	NAM-MS16	sample	GeoChem	GeoChem Trace	DualSoil	DualSoil	120	Passed	3.2435	1.0442	5.6416	0.2674	43.9011	0.4492	0.7131	0.0458	0.1772	0.0182	0.8793	0.0188	0.4523	0.0129	4.032	0.0301	2.3436	0.0163	< LOD	0.0038	< LOD	0.0028	0.5177	0.0129	8.7479	0.0421	< LOD	0.0043	0.0067	0.0024	0.0033	0.0012	0.015	0.0013	< LOD	0.0005	< LOD	0.0005	0.0032	0.0006
5838	09-27-2018 18:07	NAM-MS16	sample	GeoChem	GeoChem Trace	DualSoil	DualSoil	120	Passed	2.989	1.1126	5.1712	0.261	42.5887	0.4419	0.6001	0.0437	0.1515	0.018	0.9467	0.0185	0.4635	0.013	3.7547	0.0293	2.5418	0.017	< LOD	0.004	< LOD	0.0027	0.5092	0.0128	8.8784	0.0424	< LOD	0.0046	0.0093	0.0025	0.0037	0.0011	0.0155	0.0013	< LOD	0.0005	< LOD	0.0005	0.0032	0.0006
5839	09-27-2018 18:10	NAM-MS16	sample	GeoChem	GeoChem Trace	DualSoil	DualSoil	120	Passed	2.7618	1.0652	5.549	0.2657	44.8494	0.4544	0.5474	0.0423	0.1486	0.0178	0.8787	0.0195	0.4607	0.0129	3.9651	0.0299	2.3781	0.0163	< LOD	0.0037	< LOD	0.0027	0.5212	0.013	8.7728	0.0422	< LOD	0.0042	0.008	0.0024	0.0032	0.0011	0.0148	0.0013	< LOD	0.0005	< LOD	0.0005	0.0027	0.0006
5840	09-27-2018 18:13	NAM-MS17	sample	GeoChem	GeoChem Trace	DualSoil	DualSoil	120	Passed	1.8833	1.0171	5.4866	0.2672	46.0206	0.4613	0.4795	0.0415	< LOD	0.0158	0.4155	0.0157	0.7399	0.0153	2.9968	0.0264	2.8519	0.0176	< LOD	0.004	< LOD	0.0029	0.4116	0.0117	8.5099	0.0414	< LOD	0.004	0.0065	0.0021	0.0039	0.001	0.0108	0.001	< LOD	0.0004	< LOD	0.0004	0.0038	0.0006
5841	09-27-2018 18:15	NAM-MS17	sample	GeoChem	GeoChem Trace	DualSoil	DualSoil	120	Passed	2.3656	0.9818	5.1811	0.2618	51.4007	0.4891	0.4838	0.0429	< LOD	0.016	0.3745	0.0169	0.4567	0.0132	2.8696	0.0257	1.97	0.0145	< LOD	0.0032	< LOD	0.0026	0.3813	0.0113	7.1152	0.0373	< LOD	0.003	0.005	0.002	0.0036	0.001	0.0095	0.001	< LOD	0.0004	< LOD	0.0004	0.0032	0.0006
5842	09-27-2018 18:18	NAM-MS17	sample	GeoChem	GeoChem Trace	DualSoil	DualSoil	120	Passed	2.2677	0.9847	5.7735	0.2671	49.1776	0.4765	0.5443	0.0401	0.0377	0.0146	0.3998	0.0157	0.5277	0.0132	2.7762	0.0252	2.6871	0.0168	< LOD	0.0037	< LOD	0.0025	0.4026	0.0116	7.9251	0.0397	< LOD	0.0034	0.0048	0.0021	0.0033	0.001	0.011	0.001	< LOD	0.0004	< LOD	0.0004	0.0033	0.0006
5843	09-27-2018 18:21	NAM-MS17	sample	GeoChem	GeoChem Trace	DualSoil	DualSoil	120	Passed	2.291	0.9463	5.7141	0.2666	51.6763	0.4893	0.5306	0.0409	0.0329	0.0148	0.4	0.0161	0.5543	0.0135	2.8267	0.0253	2.0318	0.0146	< LOD	0.0032	< LOD	0.0026	0.382	0.0113	7.3874	0.0381	< LOD	0.0029	0.0067	0.002	0.0035	0.0009	0.01	0.001	< LOD	0.0004	< LOD	0.0004	0.0033	0.0006
5844	09-27-2018 18:24	NAM-MS17	sample	GeoChem	GeoChem Trace	DualSoil	DualSoil	120	Passed	2.1697	1.1183	5.0807	0.2658	46.2527	0.4659	0.3535	0.0429	< LOD	0.0172	0.4156	0.0166	0.3973	0.0129	2.6223	0.0252	3.3442	0.0192	< LOD	0.0042	< LOD	0.003	0.4557	0.0123	8.9623	0.0424	< LOD	0.0042	0.0066	0.0022	0.0033	0.001	0.0099	0.001	< LOD	0.0004	< LOD	0.0004	0.0035	0.0006
5845	09-28-2018 09:02	CS-M2	cal std	GeoChem	GeoChem Trace	DualSoil	DualSoil	60	Passed	< LOD	1.0116	12.2506	0.4963	71.1786	0.8301	0.0557	0.0311	0.1257	0.0199	< LOD	0.0213	4.7833	0.0468	0.9464	0.0224	0.1585	0.0059	< LOD	0.0017	0.0067	0.0024	0.0966	0.0089	1.6139	0.0245	0	0	0.0027	0.002	0.0226	0.0019	0.0737	0.0029	0.0069	0.0018	< LOD	0.0006	0.0149	0.0009
5846	09-28-2018 09:03	CS-M2	cal std	GeoChem	GeoChem Trace	DualSoil	DualSoil	60	Passed	< LOD	1.0668	12.3982	0.4997	71.3993	0.8319	0.0685	0.0319	0.1158	0.0197	< LOD	0.0217	4.8157	0.047	0.9301	0.0223	0.1562	0.0059	< LOD	0.0017	0.0078	0.0023	0.0971	0.0087	1.6023	0.0244	0	0	0.0039	0.002	0.0238	0.0019	0.0734	0.0029	0.0074	0.0018	< LOD	0.0006	0.0145	0.0009
5847	09-28-2018 09:05	CS-M2	cal std	GeoChem	GeoChem Trace	DualSoil	DualSoil	60	Passed	< LOD	1.0298	12.5915	0.5014	70.8807	0.8273	0.059	0.031	0.1278	0.0198	< LOD	0.0215	4.8028	0.0469	0.9435	0.0223	0.1573	0.0059	< LOD	0.0018	0.0073	0.0024	0.0966	0.0089	1.5992	0.0244	0	0	0.0024	0.002	0.0236	0.002	0.0749	0.003	0.0071	0.0018	< LOD	0.0006	0.0146	0.0009
5848	09-28-2018 09:07	CS-M2	cal std	GeoChem	GeoChem Trace	DualSoil	DualSoil	60	Passed	< LOD	1.0389	12.4047	0.4995	71.3686	0.8316	0.0576	0.0317	0.1176	0.0196	< LOD	0.0219	4.7853	0.0468	0.9337	0.0222	0.1564	0.0059	0.0018	0.0017	0.0082	0.0023	0.0962	0.0089	1.603	0.0244	0	0	< LOD	0.002	0.0232	0.002	0.0746	0.003	0.0075	0.0018	< LOD	0.0006	0.0145	0.0009
5849	09-28-2018 09:08	CS-M2	cal std	GeoChem	GeoChem Trace	DualSoil	DualSoil	60	Passed	1.1401	1.0017	12.5514	0.4994	71.2867	0.8306	0.0755	0.0305	0.1279	0.0193	< LOD	0.0218	4.8127	0.0469	0.9331	0.0222	0.1449	0.0058	< LOD	0.0017	0.0069	0.0023	0.097	0.0088	1.6202	0.0245	0	0	0.0023	0.0019	0.0232	0.0019	0.072	0.0029	0.0061	0.0018	< LOD	0.0006	0.0141	0.0009
5850	09-28-2018 09:11	CS-M2	cal std	GeoChem	GeoChem Trace	DualSoil	DualSoil	60	Passed	< LOD	1.0694	12.3274	0.499	71.4029	0.832	0.0697	0.0322	0.1231	0.0198	< LOD	0.022	4.8456	0.0471	0.9373	0.0223	0.1587	0.0059	< LOD	0.0017	0.0061	0.0023	0.0954	0.009	1.6042	0.0245	0	0	< LOD	0.002	0.0222	0.0019	0.0741	0.0029	0.0076	0.0018	< LOD	0.0006	0.0144	0.0009
5851	09-28-2018 09:12	CS-M2	cal std	GeoChem	GeoChem Trace	DualSoil	DualSoil	60	Passed	< LOD	1.0675	12.8453	0.5071	71.5018	0.8329	0.0652	0.0318	0.1247	0.0196	< LOD	0.0218	4.8385	0.047	0.9475	0.0223	0.1568	0.0058	0.0024	0.0017	0.0092	0.0023	0.0958	0.0089	1.5999	0.0244	0	0	0.0036	0.002	0.0231	0.0019	0.0736	0.0029	0.0067	0.0018	< LOD	0.0006	0.0147	0.0009
5852	09-28-2018 09:14	CS-M2	cal std	GeoChem	GeoChem Trace	DualSoil	DualSoil	60	Passed	< LOD	1.0986	12.503	0.503	71.6285	0.8342	0.058	0.032	0.1344	0.0201	< LOD	0.022	4.8452	0.0471	0.9251	0.0222	0.1583	0.0059	< LOD	0.0017	0.0068	0.0024	0.0941	0.0089	1.6202	0.0246	0	0	< LOD	0.002	0.0227	0.0019	0.0761	0.003	0.0059	0.0018	< LOD	0.0006	0.0146	0.0009
5853	09-28-2018 09:16	CS-M2	cal std	GeoChem	GeoChem Trace	DualSoil	DualSoil	60	Passed	< LOD	1.0894	12.6191	0.5038	71.7017	0.8346	0.0723	0.032	0.1269	0.0198	< LOD	0.022	4.8656	0.0472	0.927	0.0222	0.157	0.0059	< LOD	0.0017	0.0055	0.0023	0.0916	0.0089	1.6138	0.0245	0	0	< LOD	0.002	0.0241	0.002	0.0731	0.0029	0.0063	0.0018	< LOD	0.0006	0.0145	0.0009
5854	09-28-2018 09:17	CS-M2	cal std	GeoChem	GeoChem Trace	DualSoil	DualSoil	60	Passed	< LOD	1.019	12.4959	0.4997	71.2826	0.831	0.0761	0.031	0.1275	0.0196	< LOD	0.0219	4.8447	0.0471	0.9234	0.0222	0.1516	0.0058	< LOD	0.0017	0.0053	0.0023	0.096	0.0089	1.6135	0.0245	0	0	< LOD	0.002	0.0226	0.0019	0.0736	0.0029	0.0064	0.0018	< LOD	0.0006	0.0139	0.0009
5855	09-28-2018 09:19	CS-M2	cal std	GeoChem	GeoChem Trace	DualSoil	DualSoil	60	Passed	< LOD	1.0705	12.5895	0.5038	71.8518	0.8363	0.0575	0.0322	0.1195	0.0197	< LOD	0.022	4.8598	0.0472	0.9319	0.0223	0.1568	0.0059	0.002	0.0017	0.01	0.0024	0.0992	0.009	1.6059	0.0245	0	0	< LOD	0.0019	0.0229	0.0019	0.0715	0.0029	0.0076	0.0018	< LOD	0.0006	0.0147	0.0009
5856	09-28-2018 09:20	CS-M2	cal std	GeoChem	GeoChem Trace	DualSoil	DualSoil	60	Passed	< LOD	1.0606	12.2393	0.4968	71.4203	0.8321	0.0771	0.0316	0.1281	0.0198	< LOD	0.022	4.829	0.047	0.931	0.0223	0.1579	0.0059	< LOD	0.0017	0.0073	0.0024	0.0945	0.0089	1.614	0.0245	0	0	0.0023	0.002	0.0217	0.0019	0.0713	0.0029	0.0065	0.0018	< LOD	0.0005	0.0139	0.0009
5857	09-28-2018 09:22	CS-M2	cal std	GeoChem	GeoChem Trace	DualSoil	DualSoil	60	Passed	< LOD	1.0406	12.9367	0.5071	71.6944	0.8342	0.0791	0.0313	0.1229	0.0195	< LOD	0.0222	4.8315	0.047	0.9218	0.0221	0.1517	0.0058	< LOD	0.0017	0.0084	0.0024	0.0947	0.0087	1.6121	0.0245	0	0	< LOD	0.0019	0.0229	0.0019	0.0722	0.0029	0.0085	0.0018	< LOD	0.0006	0.0145	0.0009
5858	09-28-2018 09:23	CS-M2	cal std	GeoChem	GeoChem Trace	DualSoil	DualSoil	60	Passed	< LOD	1.0433	12.4389	0.4999	71.4787	0.8326	0.0599	0.0312	0.1311	0.0198	< LOD	0.0218	4.8418	0.0471	0.9345	0.0222	0.1582	0.0059	< LOD	0.0017	0.0067	0.0023	0.1008	0.0089	1.6162	0.0245	0	0	< LOD	0.0019	0.0243	0.0019	0.0728	0.0029	0.0066	0.0018	< LOD	0.0006	0.0146	0.0009
5859	09-28-2018 09:25	CS-M2	cal std	GeoChem	GeoChem Trace			60	Passed	< LOD	1.0561	12.5547	0.502	71.5249	0.833	0.0691	0.0316	0.1266	0.0197	< LOD	0.0219	4.8414	0.0471	0.9313	0.0222	0.1552	0.0059	< LOD	0.0017	0.0072	0.0023	0.0959	0.0089	1.612	0.0245	0	0	< LOD	0.002	0.023	0.0019	0.073	0.0029	0.0068	0.0018	< LOD	0.0006	0.0144	0.0009
5860	09-28-2018 09:28	MB060	qtz blank	GeoChem	GeoChem Trace	DualSoil	DualSoil	60	Passed	< LOD	0.7466	< LOD	0.1576	86.2552	0.9301	0.0572	0.0172	< LOD	0.0112	< LOD	0.0176	< LOD	0.0064	< LOD	0.0063	< LOD	0.0033	< LOD	0.0006	0.0058	0.0018	< LOD	0.003	0.0265	0.0034	0	0	< LOD	0.0015	0.0019	0.0007	0.0006	0.0005	< LOD	0.0005	< LOD	0.0004	< LOD	0.0005
5861	09-28-2018 09:30	MB060	qtz blank	GeoChem	GeoChem Trace	DualSoil	DualSoil	60	Passed	< LOD	0.7653	< LOD	0.1587	85.5812	0.9239	0.0565	0.0186	< LOD	0.0113	< LOD	0.0173	< LOD	0.0066	< LOD	0.0067	< LOD	0.003	< LOD	0.0007	0.0051	0.0018	< LOD	0.003	0.0282	0.0035	0	0	< LOD	0.0014	0.0025	0.0007	0.0007	0.0005	< LOD	0.0005	< LOD	0.0004	< LOD	0.0005
5862	09-28-2018 09:31	MB060	qtz blank	GeoChem	GeoChem Trace	DualSoil	DualSoil	60	Passed	< LOD	0.7559	< LOD	0.1566	86.4589	0.9321	0.0565	0.0179	< LOD	0.0111	< LOD	0.0173	< LOD	0.0065	< LOD	0.0058	0.0061	0.0033	0.0008	0.0007	0.0069	0.0018	0.0035	0.0034	0.0275	0.0034	0	0	< LOD	0.0015	0.0024	0.0007	0.0009	0.0005	< LOD	0.0005	< LOD	0.0004	< LOD	0.0005
5863	09-28-2018 09:33	MB060	qtz blank	GeoChem	GeoChem Trace	DualSoil	DualSoil	60	Passed	< LOD	0.7689	< LOD	0.1583	86.2553	0.9298	0.0565	0.0165	< LOD	0.0107	< LOD	0.0178	< LOD	0.0067	< LOD	0.006	< LOD	0.0033	< LOD	0.0007	0.0065	0.0019	< LOD	0.0032	0.0275	0.0035	0	0	< LOD	0.0014	0.0023	0.0007	0.0009	0.0006	< LOD	0.0005	< LOD	0.0004	< LOD	0.0005
5864	09-28-2018 09:34	MB060	qtz blank	GeoChem	GeoChem Trace	DualSoil	DualSoil	60	Passed	0.9349	0.7665	< LOD	0.1558	86.5253	0.9329	0.0561	0.0167	< LOD	0.0109	< LOD	0.0174	< LOD	0.0068	< LOD	0.0067	< LOD	0.0032	< LOD	0.0007	0.0029	0.0018	< LOD	0.0032	0.029	0.0035	0	0	< LOD	0.0015	0.0023	0.0007	0.0009	0.0006	< LOD	0.0005	< LOD	0.0004	< LOD	0.0005
5865	09-28-2018 09:36	Granite AC-E	CRM	GeoChem	GeoChem Trace	DualSoil	DualSoil	120	Passed	< LOD	0.735	13.5396	0.3621	67.9402	0.5659	< LOD	0.0233	< LOD	0.0111	< LOD	0.0151	4.251	0.0312	0.4344	0.0121	0.0491	0.0031	0.0016	0.0012	0.0081	0.0016	0.0434	0.0045	1.592	0.017	0	0	< LOD	0.0012	0.0012	0.0007	0.0195	0.0011	0.0004	0.0004	< LOD	0.0003	0.0147	0.0006
5866	09-28-2018 09:39	Granite AC-E	CRM	GeoChem	GeoChem Trace	DualSoil	DualSoil	122	Passed	< LOD	0.6905	13.5059	0.3545	68.0453	0.557	< LOD	0.0225	< LOD	0.0109	< LOD	0.0148	4.2381	0.0306	0.4346	0.0119	0.0448	0.0031	< LOD	0.0012	0.0061	0.0016	0.0466	0.0045	1.5954	0.017	0	0	< LOD	0.0012	0.002	0.0007	0.0204	0.0011	0.0005	0.0004	< LOD	0.0004	0.0147	0.0006
5867	09-28-2018 09:42	Granite AC-E	CRM	GeoChem	GeoChem Trace	DualSoil	DualSoil	120	Passed	< LOD	0.6891	13.7234	0.3626	68.1583	0.5669	< LOD	0.0229	< LOD	0.011	< LOD	0.0153	4.2589	0.0312	0.447	0.0122	0.0434	0.0031	< LOD	0.0012	0.0052	0.0017	0.0434	0.0045	1.5877	0.0169	0	0	< LOD	0.0012	0.0017	0.0007	0.0204	0.0011	< LOD	0.0004	< LOD	0.0004	0.0146	0.0006
5868	09-28-2018 09:45	Granite AC-E	CRM	GeoChem	GeoChem Trace	DualSoil	DualSoil	120	Passed	< LOD	0.6831	13.7552	0.3631	68.1293	0.5666	< LOD	0.023	< LOD	0.0111	< LOD	0.0151	4.256	0.0312	0.4431	0.0121	0.0465	0.0031	0.0015	0.0012	0.0073	0.0016	0.0437	0.0045	1.5905	0.017	0	0	< LOD	0.0012	0.0019	0.0007	0.0202	0.0011	< LOD	0.0004	< LOD	0.0004	0.015	0.0006
5869	09-28-2018 09:47	Granite AC-E	CRM	GeoChem	GeoChem Trace	DualSoil	DualSoil	120	Passed	< LOD	0.6954	13.6549	0.362	67.9993	0.566	< LOD	0.0227	< LOD	0.0111	< LOD	0.0151	4.261	0.0312	0.4454	0.0122	0.0447	0.0031	< LOD	0.0012	0.0064	0.0016	0.0401	0.0044	1.5837	0.0169	0	0	< LOD	0.0012	0.0022	0.0007	0.0207	0.0011	< LOD	0.0004	< LOD	0.0004	0.015	0.0006
5870	09-28-2018 09:50	NAM-MS45	cal sample	GeoChem	GeoChem Trace	DualSoil	DualSoil	120	Passed	2.7021	1.2093	6.3745	0.3062	19.6987	0.3112	0.0785	0.0483	< LOD	0.0216	0.812	0.0174	0.0735	0.0102	2.6385	0.0269	4.8144	0.0258	0.0085	0.007	0.0077	0.0052	0.854	0.0162	20.2505	0.0647	< LOD	0.0125	0.0332	0.0058	0.0083	0.0022	0.0388	0.0026	< LOD	0.0006	< LOD	0.0009	0.0019	0.001
5871	09-28-2018 09:52	NAM-MS45	cal sample	GeoChem	GeoChem Trace	DualSoil	DualSoil	120	Passed	2.8521	1.2952	5.9291	0.3009	17.9005	0.2987	< LOD	0.0483	< LOD	0.023	0.798	0.0172	0.0596	0.0103	2.6791	0.0272	5.676	0.0282	< LOD	0.0076	< LOD	0.0052	0.7967	0.0157	20.8448	0.0663	0.0199	0.013	0.0358	0.0063	0.0103	0.0025	0.0336	0.0026	< LOD	0.0007	< LOD	0.001	0.0024	0.0011
5872	09-28-2018 09:55	NAM-MS45	cal sample	GeoChem	GeoChem Trace	DualSoil	DualSoil	120	Passed	3.7936	1.2472	6.2725	0.3041	21.1033	0.3215	< LOD	0.0477	< LOD	0.0215	0.7915	0.017	0.0924	0.0103	2.571	0.0264	4.3703	0.0244	< LOD	0.0066	< LOD	0.0048	0.9071	0.0167	19.4168	0.063	< LOD	0.0119	0.0324	0.006	0.0073	0.0023	0.0398	0.0027	< LOD	0.0007	< LOD	0.0009	0.0016	0.0011
5873	09-28-2018 09:58	NAM-MS45	cal sample	GeoChem	GeoChem Trace	DualSoil	DualSoil	120	Passed	2.8776	1.1136	7.6243	0.3149	26.6264	0.3547	0.2615	0.0416	0.0418	0.0193	0.7709	0.0165	0.1265	0.0097	2.9933	0.0274	2.8747	0.0192	0.0151	0.0053	< LOD	0.0036	0.893	0.0165	16.8127	0.0578	< LOD	0.0097	0.016	0.0039	0.0055	0.0016	0.0237	0.0018	< LOD	0.0005	< LOD	0.0007	0.0019	0.0008
5874	09-28-2018 10:00	NAM-MS45	cal sample	GeoChem	GeoChem Trace	DualSoil	DualSoil	120	Passed	3.0947	1.1539	7.2925	0.31	26.5262	0.3539	0.1635	0.0413	< LOD	0.0193	0.8048	0.0169	0.1649	0.0103	2.7027	0.0262	3.1294	0.02	< LOD	0.0054	< LOD	0.004	0.8683	0.0162	16.8039	0.0578	< LOD	0.0098	0.0207	0.0042	0.0075	0.0018	0.029	0.0021	< LOD	0.0006	< LOD	0.0007	0.0015	0.0008
5875	09-28-2018 10:03	NAM-MS39	cal sample	GeoChem	GeoChem Trace	DualSoil	DualSoil	120	Passed	2.6007	1.0027	5.9455	0.2733	42.5042	0.443	0.5313	0.0416	0.0936	0.017	0.7153	0.0173	0.2377	0.0106	3.2237	0.0274	2.2568	0.016	< LOD	0.0039	< LOD	0.0028	0.5893	0.0137	10.3707	0.0453	< LOD	0.005	0.0096	0.0025	0.0039	0.0011	0.0164	0.0013	< LOD	0.0005	< LOD	0.0005	0.0021	0.0006
5876	09-28-2018 10:07	NAM-MS39	cal sample	GeoChem	GeoChem Trace	DualSoil	DualSoil	120	Passed	2.7373	1.0752	6.2535	0.2812	40.2677	0.4313	0.3888	0.0401	0.0468	0.0171	0.7336	0.0174	0.3292	0.0118	3.1527	0.0273	2.6173	0.0174	< LOD	0.0042	< LOD	0.003	0.6262	0.014	10.669	0.046	< LOD	0.0054	0.0105	0.0027	0.0038	0.0012	0.0173	0.0014	< LOD	0.0005	< LOD	0.0005	0.0026	0.0006
5877	09-28-2018 10:10	NAM-MS39	cal sample	GeoChem	GeoChem Trace	DualSoil	DualSoil	120	Passed	2.8754	1.0066	6.0938	0.2766	42.4881	0.443	0.6469	0.043	0.0772	0.0167	0.7289	0.0179	0.2658	0.0108	3.1813	0.0272	2.323	0.0162	< LOD	0.0038	< LOD	0.0028	0.5942	0.0137	10.2286	0.045	< LOD	0.0049	0.0105	0.0026	0.0036	0.0011	0.0153	0.0013	< LOD	0.0005	< LOD	0.0005	0.0022	0.0006
5878	09-28-2018 10:14	NAM-MS39	cal sample	GeoChem	GeoChem Trace	DualSoil	DualSoil	120	Passed	2.8234	1.08	6.4478	0.2845	39.0963	0.4252	0.3268	0.0387	0.063	0.0175	0.8533	0.018	0.3527	0.0121	3.2172	0.0276	2.81	0.018	0.0079	0.0045	< LOD	0.003	0.601	0.0138	11.386	0.0476	< LOD	0.0058	0.0094	0.0027	0.0047	0.0012	0.0174	0.0014	< LOD	0.0005	< LOD	0.0006	0.0024	0.0007
5879	09-28-2018 10:17	NAM-MS39	cal sample	GeoChem	GeoChem Trace	DualSoil	DualSoil	120	Passed	3.187	1.0621	6.1441	0.2804	39.9904	0.4316	0.4767	0.0412	0.0946	0.0174	0.7747	0.0181	0.2492	0.0108	3.1272	0.0272	2.685	0.0176	0.0044	0.0043	< LOD	0.0032	0.6856	0.0147	11.8214	0.0485	< LOD	0.0058	0.0128	0.003	0.0046	0.0013	0.0136	0.0014	< LOD	0.0005	< LOD	0.0006	0.0022	0.0007
5880	09-28-2018 10:21	NAM-MS18	sample	GeoChem	GeoChem Trace	DualSoil	DualSoil	121	Passed	2.4804	0.9706	5.2092	0.2601	42.33	0.4372	0.231	0.0398	0.2147	0.0199	1.1017	0.0195	0.2877	0.0112	2.9572	0.0261	2.6254	0.0171	< LOD	0.004	0.0056	0.0031	0.5212	0.013	9.5027	0.0435	< LOD	0.0049	0.0124	0.003	0.0047	0.0013	0.022	0.0017	< LOD	0.0005	< LOD	0.0006	0.0026	0.0007
5881	09-28-2018 10:25	NAM-MS18	sample	GeoChem	GeoChem Trace	DualSoil	DualSoil	120	Passed	2.4015	0.9479	4.8659	0.2531	44.9617	0.4526	0.5071	0.042	0.2665	0.0191	1.1349	0.0197	0.2838	0.0108	2.8691	0.0256	2.4914	0.0165	< LOD	0.0037	0.0194	0.0029	0.4704	0.0123	8.857	0.0419	< LOD	0.0044	0.0104	0.0027	0.0044	0.0013	0.0162	0.0014	< LOD	0.0005	< LOD	0.0006	0.0018	0.0007
5882	09-28-2018 10:28	NAM-MS18	sample	GeoChem	GeoChem Trace	DualSoil	DualSoil	120	Passed	3.1	0.9779	5.7586	0.2675	44.4085	0.4506	0.1981	0.0372	0.252	0.0189	0.9971	0.0193	0.4085	0.0122	2.9107	0.0258	2.3475	0.0161	< LOD	0.0037	0.0036	0.0028	0.4951	0.0126	9.2695	0.0429	< LOD	0.0044	0.01	0.0027	0.0042	0.0013	0.024	0.0017	< LOD	0.0005	< LOD	0.0006	0.0023	0.0007
5883	09-28-2018 10:31	NAM-MS18	sample	GeoChem	GeoChem Trace	DualSoil	DualSoil	120	Passed	2.8052	1.0738	5.8869	0.2751	44.4237	0.4522	0.1335	0.0386	0.1258	0.0198	0.9822	0.0211	0.3285	0.0121	2.9188	0.0262	2.1567	0.0155	< LOD	0.0037	< LOD	0.0027	0.4546	0.0121	9.2006	0.0425	< LOD	0.0045	0.0107	0.0028	0.004	0.0013	0.0281	0.0018	< LOD	0.0005	< LOD	0.0005	0.003	0.0007
5884	09-28-2018 10:34	NAM-MS18	sample	GeoChem	GeoChem Trace	DualSoil	DualSoil	120	Passed	2.2531	1.001	5.4433	0.2644	43.4688	0.4448	0.5179	0.0445	0.2704	0.0196	1.2649	0.02	0.3521	0.0117	3.0511	0.0264	2.2537	0.0158	< LOD	0.0037	< LOD	0.0026	0.4906	0.0125	8.8067	0.0418	< LOD	0.0045	0.0103	0.0028	0.0047	0.0014	0.0195	0.0016	< LOD	0.0006	< LOD	0.0006	0.0025	0.0007
5885	09-28-2018 10:37	NAM-MS14	sample	GeoChem	GeoChem Trace	DualSoil	DualSoil	120	Passed	2.656	1.0569	6.5461	0.2896	33.9715	0.3966	0.5452	0.0443	0.0384	0.0183	0.7672	0.0169	0.2237	0.0108	3.6353	0.0293	3.5855	0.0207	< LOD	0.0052	< LOD	0.0032	0.677	0.0145	11.6149	0.0487	< LOD	0.0067	0.0116	0.0029	0.0044	0.0012	0.0267	0.0017	< LOD	0.0004	< LOD	0.0005	0.002	0.0006
5886	09-28-2018 10:39	NAM-MS14	sample	GeoChem	GeoChem Trace	DualSoil	DualSoil	120	Passed	2.1324	1.1003	6.3165	0.2868	36.9222	0.4138	0.608	0.0448	0.0579	0.0186	0.8736	0.0174	0.2433	0.0112	3.3489	0.0282	3.0254	0.0188	< LOD	0.0046	< LOD	0.0031	0.7144	0.0149	10.9416	0.0469	< LOD	0.0061	0.0091	0.0025	0.004	0.0011	0.0227	0.0015	< LOD	0.0004	< LOD	0.0005	0.0022	0.0006
5887	09-28-2018 10:42	NAM-MS14	sample	GeoChem	GeoChem Trace	DualSoil	DualSoil	120	Passed	2.7349	1.1212	6.5635	0.2906	32.2215	0.3862	0.4784	0.0431	0.1087	0.019	0.8709	0.0169	0.1545	0.0099	3.8654	0.0303	3.616	0.021	< LOD	0.0053	< LOD	0.0034	0.7583	0.0154	12.3161	0.0504	< LOD	0.0072	0.0116	0.003	0.0041	0.0012	0.0286	0.0017	< LOD	0.0004	< LOD	0.0005	0.002	0.0007
5888	09-28-2018 10:46	NAM-MS14	sample	GeoChem	GeoChem Trace	DualSoil	DualSoil	120	Passed	2.9352	1.1915	6.8096	0.2964	33.7239	0.3959	0.328	0.0424	0.0394	0.0197	0.8016	0.0169	0.2125	0.011	3.344	0.0283	3.2723	0.0198	< LOD	0.0051	< LOD	0.0033	0.7451	0.0152	11.6604	0.0485	< LOD	0.0067	0.0112	0.0028	0.0041	0.0012	0.0292	0.0017	< LOD	0.0004	< LOD	0.0005	0.0028	0.0007
5889	09-28-2018 10:48	NAM-MS14	sample	GeoChem	GeoChem Trace	DualSoil	DualSoil	120	Passed	2.3379	0.9765	6.2225	0.2771	43.7733	0.447	0.3581	0.0375	0.0296	0.0171	0.9728	0.0187	0.3753	0.0123	2.6369	0.0249	2.0299	0.015	< LOD	0.0036	< LOD	0.0026	0.5985	0.0136	8.5577	0.0406	< LOD	0.0044	0.0064	0.0023	0.0037	0.001	0.0229	0.0014	< LOD	0.0004	< LOD	0.0005	0.0037	0.0006
5890	09-28-2018 10:51	NAM-MS41	sample	GeoChem	GeoChem Trace	DualSoil	DualSoil	120	Passed	2.1537	1.0562	5.742	0.2812	33.2048	0.3944	0.2313	0.0389	< LOD	0.019	0.8444	0.0182	0.2209	0.0112	2.2227	0.024	2.4504	0.0175	0.0111	0.0046	< LOD	0.0034	0.7809	0.0154	15.2865	0.0543	< LOD	0.0082	0.0175	0.0038	0.0062	0.0015	0.0152	0.0016	< LOD	0.0006	< LOD	0.0007	0.0027	0.0008
5891	09-28-2018 10:54	NAM-MS41	sample	GeoChem	GeoChem Trace	DualSoil	DualSoil	121	Passed	2.8033	1.0677	5.6605	0.279	32.5825	0.3881	0.3	0.0434	< LOD	0.0193	0.8164	0.0177	0.1888	0.0109	2.0145	0.0228	3.0125	0.0191	< LOD	0.0049	< LOD	0.0037	0.7003	0.0147	15.0978	0.0543	< LOD	0.0083	0.0157	0.0037	0.0044	0.0015	0.0284	0.0019	< LOD	0.0005	< LOD	0.0006	0.0032	0.0008
5892	09-28-2018 10:57	NAM-MS41	sample	GeoChem	GeoChem Trace	DualSoil	DualSoil	120	Passed	2.5865	1.1545	6.0663	0.2917	30.1289	0.3779	0.0597	0.0383	< LOD	0.0203	0.8541	0.0175	0.1364	0.0104	1.7329	0.0218	3.0754	0.0197	0.0076	0.0052	< LOD	0.0039	0.7605	0.0151	16.8253	0.057	< LOD	0.0093	0.0209	0.0042	0.0059	0.0016	0.0172	0.0017	< LOD	0.0006	< LOD	0.0007	0.0022	0.0009
5893	09-28-2018 10:59	NAM-MS41	sample	GeoChem	GeoChem Trace	DualSoil	DualSoil	120	Passed	2.312	0.9914	4.9511	0.2606	40.9339	0.4354	0.2783	0.0367	0.0438	0.0173	0.7968	0.0174	0.2556	0.0109	1.853	0.0216	2.025	0.0154	< LOD	0.0037	< LOD	0.0029	0.7034	0.0147	12.7042	0.0491	< LOD	0.0062	0.0114	0.0031	0.0043	0.0013	0.0122	0.0013	< LOD	0.0005	< LOD	0.0006	0.0029	0.0007
5894	09-28-2018 11:02	NAM-MS41	sample	GeoChem	GeoChem Trace	DualSoil	DualSoil	120	Passed	1.9099	0.9788	5.0855	0.2632	40.8834	0.4354	0.3054	0.0388	0.0785	0.0176	0.7477	0.0172	0.3549	0.0119	1.9489	0.0221	2.2687	0.0162	0.0096	0.0039	< LOD	0.003	0.6333	0.014	13.0779	0.0501	< LOD	0.0062	0.0139	0.0032	0.0047	0.0014	0.0135	0.0014	< LOD	0.0005	< LOD	0.0006	0.0032	0.0008
5895	09-28-2018 11:05	NAM-MS7	sample	GeoChem	GeoChem Trace	DualSoil	DualSoil	120	Passed	1.6961	1.0908	5.2906	0.2914	25.4996	0.3548	< LOD	0.0434	< LOD	0.0214	0.5826	0.0163	0.2412	0.0122	1.5703	0.0216	5.2682	0.0265	0.0113	0.0067	< LOD	0.0048	0.8077	0.0157	21.3836	0.0659	0.0344	0.0116	0.0271	0.0058	0.0094	0.0024	0.019	0.0021	< LOD	0.0007	< LOD	0.0009	0.0042	0.0011
5896	09-28-2018 11:08	NAM-MS7	sample	GeoChem	GeoChem Trace	DualSoil	DualSoil	120	Passed	2.0299	1.1341	6.414	0.3059	29.3972	0.3783	< LOD	0.0382	< LOD	0.0206	0.6705	0.0173	0.3778	0.0134	1.5165	0.0209	4.5157	0.0239	< LOD	0.006	< LOD	0.0041	0.9073	0.0165	19.5999	0.0625	0.025	0.0101	0.0189	0.0047	0.006	0.0019	0.0188	0.0019	< LOD	0.0006	< LOD	0.0008	0.0038	0.001
5897	09-28-2018 11:11	NAM-MS7	sample	GeoChem	GeoChem Trace	DualSoil	DualSoil	120	Passed	2.6964	1.1526	5.9537	0.299	25.0487	0.3496	< LOD	0.041	< LOD	0.0202	0.6211	0.0169	0.2668	0.0119	1.505	0.0209	4.7593	0.0251	0.0117	0.0064	< LOD	0.0045	0.7794	0.0154	21.6797	0.0661	0.0454	0.0118	0.0275	0.0059	0.0088	0.0024	0.0189	0.0021	< LOD	0.0007	< LOD	0.001	0.0041	0.0011
5898	09-28-2018 11:14	NAM-MS7	sample	GeoChem	GeoChem Trace	DualSoil	DualSoil	120	Passed	1.6517	1.19	5.3476	0.2982	23.5715	0.3431	< LOD	0.0421	< LOD	0.0217	0.5227	0.0168	0.1135	0.0107	1.4097	0.0207	5.7042	0.0279	< LOD	0.007	< LOD	0.0047	0.8115	0.0157	23.1145	0.0688	0.0617	0.0126	0.0307	0.0063	0.0122	0.0026	0.0164	0.0021	< LOD	0.0007	< LOD	0.001	0.0039	0.0011
5899	09-28-2018 11:17	NAM-MS7	sample	GeoChem	GeoChem Trace	DualSoil	DualSoil	120	Passed	1.5235	1.2426	6.518	0.3146	26.902	0.364	< LOD	0.0377	< LOD	0.021	0.6623	0.0182	0.3328	0.0131	1.3355	0.0201	4.4884	0.0242	< LOD	0.0062	< LOD	0.0044	0.8592	0.0161	20.7943	0.0643	0.0324	0.0111	0.0217	0.0052	0.0066	0.002	0.0215	0.0021	< LOD	0.0007	< LOD	0.0008	0.0042	0.001
5900	09-28-2018 11:50	AMIS0454	CRM	GeoChem	GeoChem Trace	DualSoil	DualSoil	121	Passed	1.6339	1.2309	1.9518	0.2464	2.9116	0.1534	< LOD	0.0362	< LOD	0.0223	< LOD	0.0161	0.065	0.0126	0.1817	0.0149	37.3078	0.0808	< LOD	0.0201	< LOD	0.0062	0.4225	0.0111	27.6244	0.0933	0.3321	0.0158	0.0362	0.0075	0.01	0.0023	0.0389	0.0029	< LOD	0.0006	< LOD	0.0011	0.0031	0.0012
5901	09-28-2018 11:53	AMIS0454	CRM	GeoChem	GeoChem Trace	DualSoil	DualSoil	120	Passed	< LOD	1.2621	1.8817	0.2492	2.9697	0.1543	< LOD	0.0354	< LOD	0.0222	< LOD	0.0161	0.0595	0.0127	0.1797	0.015	37.249	0.0814	< LOD	0.0202	< LOD	0.0062	0.4092	0.0109	27.4942	0.0931	0.3352	0.0158	0.0411	0.0077	0.011	0.0023	0.04	0.0029	< LOD	0.0006	< LOD	0.0011	0.0026	0.0012
5902	09-28-2018 11:55	AMIS0454	CRM	GeoChem	GeoChem Trace	DualSoil	DualSoil	120	Passed	2.0862	1.2609	1.9292	0.2483	2.8913	0.1535	< LOD	0.0357	< LOD	0.0224	< LOD	0.0164	0.0556	0.0127	0.1749	0.015	37.2561	0.0814	< LOD	0.0202	< LOD	0.0063	0.4165	0.011	27.6315	0.0933	0.341	0.0159	0.0406	0.0076	0.0109	0.0023	0.0391	0.0029	< LOD	0.0006	< LOD	0.0011	0.003	0.0012
5903	09-28-2018 11:58	AMIS0454	CRM	GeoChem	GeoChem Trace	DualSoil	DualSoil	120	Passed	1.7485	1.2296	1.8643	0.2492	2.8228	0.1529	< LOD	0.0354	< LOD	0.0222	< LOD	0.0163	0.0609	0.0126	0.1728	0.0149	37.3606	0.0816	< LOD	0.0202	< LOD	0.0063	0.4182	0.011	27.6504	0.0934	0.3549	0.016	0.041	0.0078	0.0113	0.0024	0.0387	0.0029	< LOD	0.0006	< LOD	0.0011	0.0023	0.0013
5904	09-28-2018 12:00	AMIS0454	CRM	GeoChem	GeoChem Trace	DualSoil	DualSoil	120	Passed	1.7449	1.2185	2.0207	0.2514	2.8926	0.1537	< LOD	0.0359	< LOD	0.0221	< LOD	0.0163	0.0554	0.0126	0.1861	0.0151	37.2898	0.0814	< LOD	0.0202	< LOD	0.0063	0.4183	0.011	27.5934	0.0933	0.3334	0.0158	0.0418	0.0076	0.0104	0.0022	0.0378	0.0028	< LOD	0.0006	< LOD	0.0011	0.0024	0.0012
5905	09-28-2018 12:12	NAM-MS29	cal sample	GeoChem	GeoChem Trace	DualSoil	DualSoil	120	Passed	2.4021	0.8475	4.3199	0.2351	55.7519	0.5055	0.3887	0.0337	0.0327	0.0138	0.5486	0.0165	0.6676	0.0142	2.0643	0.0217	1.2785	0.0115	< LOD	0.0025	< LOD	0.0021	0.2223	0.0088	5.7359	0.033	< LOD	0.0022	0.0021	0.0016	0.0031	0.0008	0.003	0.0006	< LOD	0.0004	< LOD	0.0004	0.0043	0.0005
5906	09-28-2018 12:15	NAM-MS29	cal sample	GeoChem	GeoChem Trace	DualSoil	DualSoil	120	Passed	1.7512	0.8983	4.5905	0.2423	54.7364	0.5009	0.4237	0.035	0.0327	0.0141	0.5698	0.0168	0.6601	0.0141	2.4843	0.0236	1.263	0.0115	0.0038	0.0025	0.0042	0.0022	0.2353	0.0089	5.8576	0.0335	< LOD	0.0023	0.0028	0.0016	0.0029	0.0008	0.0039	0.0007	< LOD	0.0004	< LOD	0.0004	0.0043	0.0005
5907	09-28-2018 12:17	NAM-MS29	cal sample	GeoChem	GeoChem Trace	DualSoil	DualSoil	120	Passed	1.3232	0.8174	3.9152	0.2259	59.8763	0.5232	0.2867	0.0292	0.0235	0.0129	0.5364	0.0161	0.8433	0.0152	1.6723	0.0195	0.9571	0.0097	< LOD	0.002	0.0131	0.002	0.1536	0.0075	4.3051	0.0283	< LOD	0.0014	< LOD	0.0014	0.0032	0.0006	0.0046	0.0006	< LOD	0.0004	< LOD	0.0003	0.0043	0.0005
5908	09-28-2018 12:20	NAM-MS29	cal sample	GeoChem	GeoChem Trace	DualSoil	DualSoil	120	Passed	1.0377	0.8052	4.033	0.2281	61.7061	0.5324	0.4071	0.0324	0.0449	0.0134	0.544	0.0169	0.8083	0.015	1.5555	0.0189	0.9702	0.0097	< LOD	0.0019	< LOD	0.0019	0.1329	0.007	4.0471	0.0274	< LOD	0.0012	< LOD	0.0014	0.0027	0.0007	0.0029	0.0006	< LOD	0.0004	< LOD	0.0003	0.0041	0.0005
5909	09-28-2018 12:22	NAM-MS29	cal sample	GeoChem	GeoChem Trace	DualSoil	DualSoil	120	Passed	1.9982	0.9363	4.5794	0.2444	53.6674	0.4969	0.4398	0.0358	0.0392	0.0144	0.6111	0.0168	0.6127	0.0138	2.3342	0.0231	1.5357	0.0127	< LOD	0.0027	< LOD	0.0023	0.2598	0.0094	6.6802	0.0358	< LOD	0.0026	0.0035	0.0017	0.0029	0.0008	0.0043	0.0007	< LOD	0.0004	< LOD	0.0004	0.0041	0.0005
5910	09-28-2018 12:26	NAM-MS12	cal sample	GeoChem	GeoChem Trace	DualSoil	DualSoil	120	Passed	1.8585	1.3156	2.8496	0.2692	9.7524	0.2369	< LOD	0.0501	< LOD	0.0279	0.7772	0.0183	0.2058	0.0125	1.0174	0.0192	9.52	0.0389	0.0131	0.01	< LOD	0.0068	0.383	0.0113	32.15	0.0847	0.2497	0.019	0.0633	0.0113	0.0156	0.0039	0.0193	0.0028	< LOD	0.0009	< LOD	0.0015	0.0077	0.0018
5911	09-28-2018 12:28	NAM-MS12	cal sample	GeoChem	GeoChem Trace	DualSoil	DualSoil	120	Passed	2.7731	1.2227	2.8948	0.2616	10.4886	0.2419	< LOD	0.05	< LOD	0.0259	0.7403	0.0188	0.2052	0.0125	0.956	0.0188	9.8542	0.0395	< LOD	0.0101	< LOD	0.0066	0.3748	0.0111	31.7633	0.0844	0.2715	0.0187	0.0584	0.0111	0.0171	0.004	0.0186	0.0027	< LOD	0.0009	< LOD	0.0014	0.0079	0.0018
5912	09-28-2018 12:31	NAM-MS12	cal sample	GeoChem	GeoChem Trace	DualSoil	DualSoil	120	Passed	2.3919	1.194	3.2372	0.2609	10.2341	0.2354	< LOD	0.0445	0.1124	0.0262	0.7956	0.0185	0.2118	0.012	0.9071	0.0183	9.2824	0.0381	0.0455	0.0098	< LOD	0.0063	0.4273	0.0117	31.928	0.0842	0.2507	0.0188	0.0606	0.0114	0.0179	0.0041	0.0178	0.0029	< LOD	0.0009	< LOD	0.0015	0.0073	0.0017
5913	09-28-2018 12:33	NAM-MS12	cal sample	GeoChem	GeoChem Trace	DualSoil	DualSoil	120	Passed	1.5864	1.2035	3.0639	0.2726	10.0601	0.2397	< LOD	0.0459	< LOD	0.0274	0.7749	0.0179	0.2389	0.0129	0.8646	0.0183	9.0628	0.0379	0.0126	0.0098	< LOD	0.0066	0.4338	0.0118	31.993	0.084	0.2421	0.019	0.0534	0.0107	0.012	0.0037	0.0174	0.0027	< LOD	0.0009	< LOD	0.0014	0.0066	0.0017
5914	09-28-2018 12:36	NAM-MS12	cal sample	GeoChem	GeoChem Trace	DualSoil	DualSoil	120	Passed	2.4539	1.3019	2.6852	0.2615	9.9174	0.2372	< LOD	0.0486	< LOD	0.0258	0.7006	0.0187	0.1807	0.0124	0.8929	0.0186	10.0676	0.04	< LOD	0.0102	< LOD	0.0066	0.3879	0.0112	32.1917	0.0851	0.2621	0.0189	0.0615	0.011	0.0174	0.0039	0.0187	0.0028	< LOD	0.0009	< LOD	0.0014	0.0079	0.0017
5915	09-28-2018 12:39	NAM-MS15	sample	GeoChem	GeoChem Trace	DualSoil	DualSoil	120	Passed	2.3752	1.0203	6.8723	0.2931	32.9427	0.3898	0.3619	0.0404	0.0821	0.0191	1.3904	0.0203	0.2641	0.0112	3.3206	0.0282	3.5851	0.0206	< LOD	0.0052	< LOD	0.0031	0.7816	0.0155	12.0729	0.0494	< LOD	0.007	0.0128	0.0031	0.0052	0.0013	0.0293	0.0018	< LOD	0.0005	< LOD	0.0006	0.0021	0.0007
5916	09-28-2018 12:41	NAM-MS15	sample	GeoChem	GeoChem Trace	DualSoil	DualSoil	120	Passed	2.2168	0.9601	7.1528	0.2957	37.7071	0.4172	0.4079	0.0397	0.0708	0.018	1.1312	0.0198	0.2689	0.0111	3.4864	0.0286	2.9105	0.0183	< LOD	0.0045	< LOD	0.003	0.7919	0.0156	11.0967	0.0471	< LOD	0.0059	0.009	0.0028	0.0043	0.0012	0.024	0.0016	< LOD	0.0005	< LOD	0.0006	0.0017	0.0007
5917	09-28-2018 12:44	NAM-MS15	sample	GeoChem	GeoChem Trace	DualSoil	DualSoil	120	Passed	2.6071	1.1046	6.4238	0.2926	33.5713	0.3964	0.3971	0.0442	0.0209	0.0199	1.3313	0.0206	0.2493	0.0117	3.0994	0.0276	3.9773	0.0218	< LOD	0.0053	< LOD	0.0033	0.7361	0.0151	12.2026	0.0497	< LOD	0.007	0.0137	0.0032	0.0048	0.0014	0.0271	0.0018	< LOD	0.0005	< LOD	0.0006	0.0022	0.0007
5918	09-28-2018 12:46	NAM-MS15	sample	GeoChem	GeoChem Trace	DualSoil	DualSoil	120	Passed	2.5938	1.1504	6.5775	0.2949	34.4283	0.402	0.457	0.0458	< LOD	0.02	1.2182	0.0201	0.2651	0.0119	3.2778	0.0283	3.6831	0.021	< LOD	0.0052	< LOD	0.0034	0.735	0.0151	12.0375	0.0493	< LOD	0.0068	0.0111	0.0031	0.0036	0.0013	0.0248	0.0017	< LOD	0.0005	< LOD	0.0006	0.0029	0.0007
5919	09-28-2018 12:49	NAM-MS15	sample	GeoChem	GeoChem Trace	DualSoil	DualSoil	120	Passed	2.9077	1.1265	6.9058	0.2975	35.5447	0.4069	0.557	0.0461	0.0217	0.019	1.0424	0.0192	0.2572	0.0116	3.5808	0.0292	3.3478	0.0199	< LOD	0.005	< LOD	0.0032	0.7741	0.0155	11.4542	0.0481	< LOD	0.0063	0.0138	0.0031	0.004	0.0013	0.0269	0.0018	< LOD	0.0005	< LOD	0.0006	0.0018	0.0007
5920	09-28-2018 12:59	NAM-MS8	sample	GeoChem	GeoChem Trace	DualSoil	DualSoil	120	Passed	1.3005	1.2703	3.2469	0.2698	8.5611	0.2211	< LOD	0.045	< LOD	0.0239	0.5722	0.0156	0.0779	0.0107	0.7181	0.0171	8.7266	0.0372	0.0218	0.0099	< LOD	0.0065	0.5447	0.013	31.4239	0.0825	0.2185	0.0194	0.0554	0.0107	0.0158	0.0037	0.0172	0.0027	< LOD	0.0009	< LOD	0.0014	0.0077	0.0017
5921	09-28-2018 13:01	NAM-MS8	sample	GeoChem	GeoChem Trace	DualSoil	DualSoil	120	Passed	1.9343	1.2301	3.6814	0.2711	8.9225	0.2216	< LOD	0.041	< LOD	0.0228	0.5821	0.0157	0.1074	0.0104	0.7981	0.0173	8.7236	0.037	0.0375	0.0097	< LOD	0.0062	0.5523	0.013	31.4339	0.0825	0.2298	0.0191	0.0494	0.0098	0.0133	0.0034	0.0228	0.0028	< LOD	0.0008	< LOD	0.0013	0.0084	0.0016
5922	09-28-2018 13:04	NAM-MS8	sample	GeoChem	GeoChem Trace	DualSoil	DualSoil	120	Passed	1.7288	1.0708	3.4818	0.2655	7.9964	0.2109	< LOD	0.045	< LOD	0.0233	0.6329	0.0154	0.1091	0.0104	0.7105	0.0166	9.0951	0.0379	0.0358	0.0099	< LOD	0.0061	0.5506	0.0131	31.5099	0.083	0.2142	0.0194	0.0584	0.0109	0.0147	0.0037	0.0183	0.0027	< LOD	0.0008	0.0015	0.0014	0.0083	0.0017
5923	09-28-2018 13:07	NAM-MS8	sample	GeoChem	GeoChem Trace	DualSoil	DualSoil	120	Passed	1.5172	1.1369	3.1696	0.2614	7.469	0.2061	< LOD	0.043	< LOD	0.0234	0.5487	0.0154	0.1065	0.0105	0.6754	0.0165	9.2688	0.0386	0.0263	0.01	< LOD	0.0065	0.4839	0.0123	33.0157	0.0851	0.2601	0.0201	0.0554	0.011	0.0141	0.0038	0.02	0.0028	< LOD	0.0008	< LOD	0.0013	0.0086	0.0017
5924	09-28-2018 13:09	NAM-MS8	sample	GeoChem	GeoChem Trace	DualSoil	DualSoil	120	Passed	2.159	1.2043	4.0889	0.2819	9.1017	0.2239	< LOD	0.0412	< LOD	0.0226	0.5006	0.0152	0.1054	0.0102	0.823	0.0174	8.3756	0.0362	0.0271	0.0095	< LOD	0.0059	0.5813	0.0134	31.6384	0.0826	0.2244	0.0191	0.0569	0.0098	0.0151	0.0033	0.0231	0.0027	< LOD	0.0008	< LOD	0.0013	0.0083	0.0016
5925	09-28-2018 13:12	NAM-MS44	sample	GeoChem	GeoChem Trace	DualSoil	DualSoil	120	Passed	2.8981	1.1422	7.4855	0.3186	20.3526	0.3124	< LOD	0.0447	0.059	0.0211	0.9238	0.0166	0.1176	0.0098	2.2302	0.0244	3.5432	0.0218	0.0157	0.0062	< LOD	0.0045	1.0301	0.0176	19.5089	0.0623	< LOD	0.0121	0.0294	0.0055	0.0098	0.0023	0.0211	0.0021	< LOD	0.0006	< LOD	0.0009	0.0024	0.001
5926	09-28-2018 13:30	NAM-MS44	sample	GeoChem	GeoChem Trace	DualSoil	DualSoil	120	Passed	3.0755	1.1549	6.7885	0.3145	20.9367	0.3205	< LOD	0.046	< LOD	0.0225	0.8901	0.0168	0.0686	0.0102	2.1633	0.0245	3.7637	0.0226	< LOD	0.0063	< LOD	0.0048	1.0317	0.0176	19.5321	0.0624	< LOD	0.0121	0.0262	0.0055	0.0061	0.0021	0.0199	0.002	< LOD	0.0006	< LOD	0.0008	0.0017	0.001
5927	09-28-2018 13:33	NAM-MS44	sample	GeoChem	GeoChem Trace	DualSoil	DualSoil	120	Passed	2.6185	1.2091	7.3753	0.3227	20.2304	0.3141	< LOD	0.0447	< LOD	0.0223	0.8085	0.0162	0.0887	0.01	1.8927	0.0231	3.7737	0.0226	< LOD	0.0063	< LOD	0.0045	1.061	0.0178	19.9075	0.0628	< LOD	0.0123	0.0228	0.0055	0.0082	0.0022	0.0238	0.0022	< LOD	0.0006	< LOD	0.0009	0.0023	0.001
5928	09-28-2018 13:36	NAM-MS44	sample	GeoChem	GeoChem Trace	DualSoil	DualSoil	120	Passed	3.3988	1.2505	7.7289	0.3266	21.0558	0.3203	< LOD	0.0431	< LOD	0.0219	0.8366	0.017	0.0666	0.0098	2.0986	0.0241	3.5673	0.0219	0.0108	0.0062	< LOD	0.0043	1.1442	0.0184	19.5599	0.0622	< LOD	0.0119	0.0273	0.0054	0.0074	0.0021	0.0226	0.0021	< LOD	0.0006	< LOD	0.0009	0.002	0.001
5929	09-28-2018 13:38	NAM-MS44	sample	GeoChem	GeoChem Trace	DualSoil	DualSoil	122	Passed	2.9466	1.232	7.3636	0.3143	22.5881	0.3251	< LOD	0.0443	< LOD	0.0212	0.8409	0.0168	0.0651	0.0096	2.171	0.0239	3.8464	0.0222	< LOD	0.0061	< LOD	0.0041	1.0788	0.0179	19.0227	0.0616	< LOD	0.0114	0.0296	0.0054	0.0079	0.0021	0.0235	0.0021	< LOD	0.0006	< LOD	0.0008	0.003	0.001
5930	09-28-2018 13:41	NAM-MS3	sample	GeoChem	GeoChem Trace	DualSoil	DualSoil	120	Passed	2.252	1.1115	5.8888	0.3062	15.9051	0.2847	< LOD	0.0437	< LOD	0.0243	0.8197	0.0179	0.05	0.01	1.4404	0.0214	5.0032	0.0271	0.02	0.0074	< LOD	0.0054	0.6939	0.0146	25.7604	0.0725	0.0758	0.0155	0.0455	0.0082	0.014	0.0031	0.0199	0.0025	< LOD	0.0008	< LOD	0.0011	0.0051	0.0014
5931	09-28-2018 13:50	NAM-MS3	sample	GeoChem	GeoChem Trace	DualSoil	DualSoil	120	Passed	2.3619	1.2632	6.1897	0.3152	16.7007	0.2935	< LOD	0.0444	< LOD	0.0248	0.8402	0.0177	0.0722	0.0104	1.3628	0.0207	4.7535	0.0263	0.0103	0.0072	< LOD	0.0053	0.7156	0.0148	25.5019	0.0718	0.054	0.0151	0.0375	0.0076	0.0114	0.0029	0.0188	0.0023	< LOD	0.0008	< LOD	0.001	0.0044	0.0013
5932	09-28-2018 13:53	NAM-MS3	sample	GeoChem	GeoChem Trace	DualSoil	DualSoil	120	Passed	2.8827	1.182	5.5486	0.303	15.9249	0.2862	< LOD	0.0457	< LOD	0.0245	0.76	0.0176	0.0794	0.0105	1.5295	0.0217	4.9536	0.027	0.0133	0.0073	< LOD	0.0054	0.6865	0.0145	26.1088	0.0732	0.0766	0.0157	0.0477	0.0084	0.0151	0.0033	0.0312	0.0029	< LOD	0.0008	< LOD	0.0012	0.0053	0.0014
5933	09-28-2018 13:55	NAM-MS3	sample	GeoChem	GeoChem Trace	DualSoil	DualSoil	120	Passed	2.0566	1.2388	5.8437	0.311	15.4855	0.2827	< LOD	0.0459	< LOD	0.025	0.9443	0.0181	0.0675	0.0102	1.1976	0.0198	5.0047	0.0271	0.0204	0.0074	< LOD	0.0057	0.6253	0.0139	26.0834	0.0728	0.0814	0.0157	0.0391	0.008	0.0147	0.0031	0.0222	0.0025	< LOD	0.0008	< LOD	0.0011	0.005	0.0014
5934	09-28-2018 13:58	NAM-MS3	sample	GeoChem	GeoChem Trace	DualSoil	DualSoil	120	Passed	2.1404	1.1449	6.5907	0.3204	17.4159	0.2969	< LOD	0.0444	< LOD	0.0242	0.854	0.0176	0.058	0.0099	1.3287	0.0204	4.2247	0.0246	0.0147	0.0069	< LOD	0.005	0.7592	0.0152	24.5352	0.07	0.041	0.0147	0.0407	0.0074	0.0132	0.0029	0.0186	0.0023	< LOD	0.0008	< LOD	0.001	0.0048	0.0013
5935	09-28-2018 14:01	CRM3	CRM	GeoChem	GeoChem Trace	DualSoil	DualSoil	120	Passed	< LOD	0.6694	15.8731	0.3739	67.5222	0.5543	0.0444	0.0175	< LOD	0.0102	< LOD	0.0144	3.406	0.0278	0.4684	0.012	< LOD	0.0023	< LOD	0.0012	0.0214	0.0017	0.1319	0.0068	0.3288	0.0079	0	0	< LOD	0.0011	0.0019	0.0006	0.0089	0.0008	< LOD	0.0005	< LOD	0.0003	0.2394	0.0019
5936	09-28-2018 14:04	CRM3	CRM	GeoChem	GeoChem Trace	DualSoil	DualSoil	121	Passed	< LOD	0.7016	15.594	0.3692	67.4466	0.5494	0.0366	0.0176	< LOD	0.0102	< LOD	0.0141	3.3453	0.0273	0.4798	0.0119	< LOD	0.0023	< LOD	0.0012	0.0212	0.0016	0.1282	0.0067	0.3267	0.0079	0	0	< LOD	0.0011	0.0022	0.0006	0.0092	0.0007	< LOD	0.0005	< LOD	0.0004	0.2373	0.0019
5937	09-28-2018 14:06	CRM3	CRM	GeoChem	GeoChem Trace	DualSoil	DualSoil	120	Passed	< LOD	0.6762	15.502	0.3703	67.2064	0.5525	0.0334	0.018	< LOD	0.0102	< LOD	0.0142	3.3131	0.0274	0.4886	0.0121	< LOD	0.0024	< LOD	0.0012	0.0211	0.0017	0.125	0.0066	0.3128	0.0077	0	0	< LOD	0.0011	0.0019	0.0006	0.009	0.0008	< LOD	0.0005	< LOD	0.0004	0.2392	0.0019
5938	09-28-2018 14:09	CRM3	CRM	GeoChem	GeoChem Trace	DualSoil	DualSoil	120	Passed	< LOD	0.669	15.7809	0.3733	67.6502	0.5548	0.0435	0.018	< LOD	0.0101	< LOD	0.0144	3.3408	0.0275	0.49	0.0122	< LOD	0.0023	< LOD	0.0012	0.0215	0.0017	0.1236	0.0066	0.3198	0.0078	0	0	< LOD	0.0011	0.002	0.0006	0.0089	0.0008	< LOD	0.0005	< LOD	0.0004	0.2443	0.0019
5939	09-28-2018 14:11	CRM3	CRM	GeoChem	GeoChem Trace	DualSoil	DualSoil	120	Passed	< LOD	0.6648	15.8922	0.374	67.7104	0.5552	0.0361	0.0178	< LOD	0.0102	< LOD	0.0143	3.3363	0.0275	0.4952	0.0122	< LOD	0.0023	< LOD	0.0012	0.0219	0.0016	0.1269	0.0066	0.3188	0.0078	0	0	< LOD	0.0011	0.0025	0.0006	0.0086	0.0007	< LOD	0.0005	< LOD	0.0003	0.2361	0.0019
5940	09-28-2018 14:14	NAM-MS43	cal sample	GeoChem	GeoChem Trace	DualSoil	DualSoil	120	Passed	2.2738	1.1053	7.369	0.3011	37.6511	0.4163	0.2261	0.0367	0.0646	0.0181	0.9189	0.018	0.2168	0.0105	2.7758	0.0257	1.06	0.0115	0.009	0.0033	0.0136	0.0031	0.859	0.0161	12.7516	0.0492	< LOD	0.0065	0.0119	0.0032	0.0054	0.0014	0.0256	0.0018	< LOD	0.0005	< LOD	0.0006	0.0026	0.0008
5941	09-28-2018 14:17	NAM-MS43	cal sample	GeoChem	GeoChem Trace	DualSoil	DualSoil	120	Passed	2.9172	1.08	7.9206	0.3084	37.7481	0.4166	0.2186	0.0355	0.0646	0.0181	0.9993	0.0187	0.2429	0.0109	2.5971	0.0249	1.333	0.0126	< LOD	0.0035	< LOD	0.003	0.7737	0.0152	12.594	0.0488	< LOD	0.0063	0.0111	0.0031	0.0046	0.0013	0.0256	0.0018	< LOD	0.0005	< LOD	0.0006	0.0024	0.0007
5942	09-28-2018 14:19	NAM-MS43	cal sample	GeoChem	GeoChem Trace	DualSoil	DualSoil	120	Passed	1.8615	1.0622	7.6087	0.3059	36.0018	0.407	0.3532	0.0391	0.0777	0.018	0.8725	0.0175	0.2335	0.0105	3.1611	0.0273	0.9269	0.0109	0.0119	0.0032	0.0177	0.0032	0.9123	0.0166	13.0912	0.05	< LOD	0.0068	0.0125	0.0031	0.0048	0.0013	0.0204	0.0016	< LOD	0.0005	< LOD	0.0006	0.0027	0.0007
5943	09-28-2018 14:22	NAM-MS43	cal sample	GeoChem	GeoChem Trace	DualSoil	DualSoil	120	Passed	2.268	1.0225	7.266	0.2981	38.0307	0.4183	0.4181	0.039	0.0404	0.0175	0.8273	0.0176	0.2878	0.0113	2.819	0.0259	1.2068	0.0121	0.0132	0.0034	0.0041	0.003	0.8533	0.016	12.1008	0.0479	< LOD	0.0062	0.0121	0.003	0.0041	0.0012	0.0196	0.0015	< LOD	0.0005	< LOD	0.0006	0.0035	0.0007
5944	09-28-2018 14:24	NAM-MS43	cal sample	GeoChem	GeoChem Trace	DualSoil	DualSoil	120	Passed	2.4701	1.011	7.3308	0.2962	40.8286	0.4325	0.2889	0.0351	0.0567	0.017	1.0501	0.0194	0.2574	0.0107	2.677	0.025	1.2485	0.0121	0.006	0.0032	< LOD	0.0027	0.8118	0.0156	11.1942	0.046	< LOD	0.0055	0.0074	0.0027	0.0043	0.0012	0.0233	0.0016	< LOD	0.0005	< LOD	0.0005	0.002	0.0007
5945	09-28-2018 14:27	NAM-MS5	cal sample	GeoChem	GeoChem Trace	DualSoil	DualSoil	120	Passed	2.3295	1.2495	3.2294	0.262	7.558	0.2085	< LOD	0.0425	< LOD	0.0231	0.4775	0.0148	0.0815	0.0105	0.7105	0.0168	9.3212	0.0386	< LOD	0.0101	< LOD	0.0069	0.5084	0.0126	31.7728	0.0834	0.2245	0.0195	0.0565	0.0107	0.0153	0.0036	0.0165	0.0025	< LOD	0.0008	< LOD	0.0013	0.0076	0.0017
5946	09-28-2018 14:29	NAM-MS5	cal sample	GeoChem	GeoChem Trace	DualSoil	DualSoil	120	Passed	1.7713	1.1991	2.5592	0.2485	6.1131	0.1913	< LOD	0.0449	< LOD	0.0242	0.4688	0.0146	0.0675	0.0105	0.5031	0.0152	10.1928	0.0406	< LOD	0.0106	< LOD	0.0075	0.4625	0.012	32.3188	0.0847	0.2509	0.0202	0.0554	0.0104	0.0139	0.0035	0.0244	0.0028	< LOD	0.0008	0.0015	0.0013	0.0074	0.0016
5947	09-28-2018 14:33	NAM-MS5	cal sample	GeoChem	GeoChem Trace	DualSoil	DualSoil	120	Passed	1.6523	1.2489	3.4769	0.2672	7.9336	0.2107	< LOD	0.0437	< LOD	0.0228	0.5208	0.015	0.092	0.0102	0.8116	0.0174	8.9123	0.0375	0.0335	0.0098	< LOD	0.0063	0.5539	0.0131	31.5851	0.083	0.2235	0.0195	0.0568	0.0102	0.0136	0.0034	0.017	0.0025	< LOD	0.0008	0.0014	0.0013	0.0069	0.0016
5948	09-28-2018 14:35	NAM-MS5	cal sample	GeoChem	GeoChem Trace	DualSoil	DualSoil	120	Passed	2.3338	1.1341	3.4595	0.2618	7.9337	0.209	< LOD	0.0437	< LOD	0.0221	0.4894	0.0148	0.1076	0.0101	0.5655	0.0152	9.0829	0.0377	0.0237	0.0098	< LOD	0.0062	0.5257	0.0128	31.2482	0.0824	0.2118	0.0193	0.0547	0.0105	0.0129	0.0036	0.0184	0.0026	< LOD	0.0008	< LOD	0.0013	0.0079	0.0016
5949	09-28-2018 14:38	NAM-MS5	cal sample	GeoChem	GeoChem Trace	DualSoil	DualSoil	121	Passed	2.4812	1.2473	3.2078	0.2555	6.5881	0.1922	< LOD	0.0421	< LOD	0.0228	0.5204	0.0147	0.0928	0.01	0.5694	0.0153	9.8793	0.0393	0.0312	0.0103	< LOD	0.0069	0.4518	0.0119	32.0637	0.0841	0.2519	0.0199	0.0603	0.0107	0.0136	0.0035	0.0216	0.0028	< LOD	0.0008	0.0015	0.0013	0.0069	0.0016
5950	09-28-2018 14:41	NAM-MS11	sample	GeoChem	GeoChem Trace	DualSoil	DualSoil	120	Passed	2.1403	1.0468	5.4333	0.299	13.2997	0.2623	< LOD	0.0367	< LOD	0.0236	0.6415	0.0152	0.0785	0.0101	0.8233	0.0173	5.0827	0.0275	0.031	0.0076	< LOD	0.0054	0.7701	0.0151	27.779	0.0744	0.066	0.017	0.0363	0.0075	0.0099	0.0026	0.0167	0.0021	< LOD	0.0007	< LOD	0.0011	0.0055	0.0013
5951	09-28-2018 14:43	NAM-MS11	sample	GeoChem	GeoChem Trace	DualSoil	DualSoil	120	Passed	2.2475	1.1825	5.7579	0.3058	14.6674	0.2743	< LOD	0.0357	< LOD	0.0228	0.6112	0.0153	0.0685	0.0099	0.9345	0.0179	4.7248	0.0264	0.0101	0.0073	< LOD	0.0057	0.7844	0.0153	27.4496	0.0738	0.0581	0.0164	0.0381	0.0078	0.0104	0.0027	0.0172	0.0023	< LOD	0.0007	< LOD	0.0011	0.0058	0.0014
5952	09-28-2018 14:46	NAM-MS11	sample	GeoChem	GeoChem Trace	DualSoil	DualSoil	120	Passed	1.9482	1.0834	5.2319	0.2963	12.861	0.2579	< LOD	0.0364	< LOD	0.0231	0.6438	0.0154	0.099	0.01	0.7999	0.0169	5.2763	0.028	0.0405	0.0077	< LOD	0.0057	0.7739	0.0152	28.0936	0.0751	0.0651	0.0172	0.0392	0.0082	0.0076	0.0026	0.0197	0.0024	< LOD	0.0007	< LOD	0.0011	0.0063	0.0014
5953	09-28-2018 14:49	NAM-MS11	sample	GeoChem	GeoChem Trace	DualSoil	DualSoil	122	Passed	2.1819	1.2624	4.781	0.2853	12.2207	0.2494	< LOD	0.0374	< LOD	0.0232	0.7561	0.0173	0.0553	0.0101	0.7173	0.0165	5.5293	0.0285	0.0369	0.008	< LOD	0.0061	0.6998	0.0145	28.7622	0.0761	0.0924	0.0177	0.0335	0.0084	0.0077	0.0028	0.0161	0.0023	< LOD	0.0007	< LOD	0.0011	0.0061	0.0014
5954	09-28-2018 14:51	NAM-MS11	sample	GeoChem	GeoChem Trace	DualSoil	DualSoil	120	Passed	2.3702	1.2264	5.3373	0.3008	12.9811	0.2614	< LOD	0.0388	< LOD	0.0234	0.7111	0.0163	0.0869	0.0104	0.9172	0.018	5.448	0.0286	0.017	0.0079	< LOD	0.0059	0.7532	0.015	28.144	0.0754	0.0786	0.017	0.036	0.0079	0.0084	0.0028	0.0181	0.0023	< LOD	0.0007	< LOD	0.0011	0.0061	0.0013
5955	09-28-2018 14:54	NAM-MS25	sample	GeoChem	GeoChem Trace	DualSoil	DualSoil	121	Passed	2.2224	1.144	7.5452	0.3183	23.3408	0.3321	< LOD	0.0403	< LOD	0.0202	0.6885	0.0153	0.0799	0.0096	1.7881	0.0221	2.9221	0.0195	< LOD	0.0055	< LOD	0.0045	0.974	0.017	18.7281	0.0602	< LOD	0.0113	0.0226	0.005	0.007	0.002	0.0173	0.0019	< LOD	0.0006	< LOD	0.0008	0.0033	0.001
5956	09-28-2018 14:57	NAM-MS25	sample	GeoChem	GeoChem Trace	DualSoil	DualSoil	120	Passed	2.4418	1.2123	7.8995	0.326	22.5783	0.3289	< LOD	0.0404	< LOD	0.0204	0.679	0.0154	0.112	0.0101	1.9711	0.0232	3.1681	0.0204	0.0225	0.0058	< LOD	0.0042	1.003	0.0172	18.5211	0.0601	< LOD	0.0113	0.0198	0.0046	0.007	0.0019	0.0264	0.0021	< LOD	0.0006	< LOD	0.0007	0.0031	0.0009
5957	09-28-2018 14:59	NAM-MS25	sample	GeoChem	GeoChem Trace	DualSoil	DualSoil	120	Passed	2.6663	1.1402	8.5929	0.3357	26.0829	0.3529	< LOD	0.0372	< LOD	0.019	0.8241	0.0172	0.0945	0.0093	1.8479	0.0223	2.4903	0.0179	0.0093	0.005	0.0139	0.0042	1.0464	0.0176	18.3511	0.0593	< LOD	0.0104	0.0189	0.0045	0.0067	0.0018	0.0236	0.002	< LOD	0.0006	< LOD	0.0007	0.0027	0.0009
5958	09-28-2018 15:02	NAM-MS25	sample	GeoChem	GeoChem Trace	DualSoil	DualSoil	120	Passed	2.4172	1.1498	8.138	0.3323	23.0527	0.3333	< LOD	0.0398	< LOD	0.0206	0.7128	0.0161	0.0668	0.0096	1.8071	0.0224	2.953	0.0197	0.0067	0.0056	< LOD	0.0041	0.9925	0.0171	19.0861	0.0608	< LOD	0.0114	0.0239	0.005	0.0079	0.002	0.0203	0.002	< LOD	0.0006	< LOD	0.0008	0.0021	0.001
5959	09-28-2018 15:04	NAM-MS25	sample	GeoChem	GeoChem Trace	DualSoil	DualSoil	120	Passed	2.9624	1.1808	7.6842	0.3233	22.7244	0.3305	< LOD	0.045	< LOD	0.0207	0.6352	0.0155	0.043	0.0093	2.0675	0.0236	3.0735	0.0202	< LOD	0.0057	< LOD	0.004	0.908	0.0165	18.7748	0.0606	< LOD	0.0113	0.0264	0.0054	0.0083	0.0022	0.0258	0.0022	< LOD	0.0006	< LOD	0.0008	0.0017	0.001
5960	09-28-2018 15:07	NAM-MS31	sample	GeoChem	GeoChem Trace	DualSoil	DualSoil	120	Passed	2.7884	1.1066	4.1577	0.2551	36.9111	0.4158	0.3508	0.0436	0.3322	0.0238	1.5359	0.0217	0.4242	0.0134	2.9574	0.0271	3.9282	0.0218	< LOD	0.0052	< LOD	0.0033	0.3414	0.0108	12.3624	0.0504	< LOD	0.0066	0.0139	0.003	0.0055	0.0013	0.0107	0.0012	< LOD	0.0005	< LOD	0.0005	0.0031	0.0007
5961	09-28-2018 15:10	NAM-MS31	sample	GeoChem	GeoChem Trace	DualSoil	DualSoil	120	Passed	3.34	1.0769	4.4262	0.2538	35.3653	0.4059	0.5233	0.0452	0.3146	0.0217	1.3685	0.0205	0.39	0.0127	3.6719	0.0297	4.1573	0.0226	0.009	0.0054	< LOD	0.0033	0.3615	0.0111	12.9258	0.0522	< LOD	0.0069	0.0139	0.0031	0.0041	0.0013	0.0088	0.0011	< LOD	0.0005	< LOD	0.0005	0.003	0.0007
5962	09-28-2018 15:13	NAM-MS31	sample	GeoChem	GeoChem Trace	DualSoil	DualSoil	120	Passed	2.8664	1.0865	4.408	0.2549	36.8412	0.4141	0.4361	0.0432	0.3629	0.0225	1.4656	0.0212	0.4767	0.0134	3.0928	0.0274	3.9847	0.0219	0.0054	0.0051	< LOD	0.0032	0.3865	0.0113	12.7143	0.0513	< LOD	0.0066	0.0144	0.0032	0.0063	0.0015	0.016	0.0015	< LOD	0.0005	< LOD	0.0006	0.0036	0.0007
5963	09-28-2018 15:15	NAM-MS31	sample	GeoChem	GeoChem Trace	DualSoil	DualSoil	120	Passed	2.9541	1.034	4.5554	0.2542	39.865	0.4304	0.4466	0.0414	0.3348	0.022	1.3985	0.0216	0.4652	0.0133	2.9422	0.0267	3.2976	0.0197	0.0087	0.0046	< LOD	0.0031	0.3631	0.011	11.4894	0.0483	< LOD	0.0057	0.01	0.0027	0.0053	0.0012	0.0069	0.001	< LOD	0.0005	< LOD	0.0005	0.0035	0.0007
5964	09-28-2018 15:18	NAM-MS31	sample	GeoChem	GeoChem Trace	DualSoil	DualSoil	120	Passed	2.3073	1.0781	4.5783	0.2562	38.2654	0.4208	0.3611	0.0405	0.3294	0.0225	1.3769	0.021	0.5071	0.0138	2.9677	0.0268	3.611	0.0207	0.0069	0.0049	< LOD	0.0034	0.3083	0.0102	11.565	0.0486	< LOD	0.0061	0.0126	0.0028	0.0043	0.0012	0.0067	0.001	< LOD	0.0005	< LOD	0.0005	0.0033	0.0007
5965	09-28-2018 15:30	NAM-MS24	sample	GeoChem	GeoChem Trace	DualSoil	DualSoil	120	Passed	2.3148	1.0524	8.9106	0.3274	31.432	0.3818	0.0537	0.0296	< LOD	0.0172	0.618	0.0159	0.15	0.0097	2.5459	0.0251	1.284	0.0128	0.0092	0.0038	0.026	0.0036	0.9925	0.0172	14.5816	0.0524	< LOD	0.0081	0.0118	0.0034	0.004	0.0013	0.0217	0.0017	< LOD	0.0005	< LOD	0.0006	0.0024	0.0007
5966	09-28-2018 15:33	NAM-MS24	sample	GeoChem	GeoChem Trace	DualSoil	DualSoil	120	Passed	2.3069	1.0597	8.9164	0.3284	32.4936	0.3882	0.3572	0.0382	< LOD	0.0175	0.5705	0.0155	0.2054	0.0104	2.6958	0.0256	1.0681	0.0117	0.0109	0.0036	0.0266	0.0035	1.0257	0.0175	14.0837	0.0516	< LOD	0.0077	0.0118	0.0033	0.0045	0.0013	0.0218	0.0017	< LOD	0.0005	< LOD	0.0006	0.0024	0.0007
5967	09-28-2018 15:36	NAM-MS24	sample	GeoChem	GeoChem Trace	DualSoil	DualSoil	120	Passed	2.5494	1.0898	8.7557	0.3245	31.5809	0.3824	0.0834	0.0304	0.0244	0.0173	0.619	0.0155	0.1511	0.0098	2.7204	0.0258	1.284	0.0128	0.0062	0.0038	0.0121	0.0036	0.9848	0.0171	14.4178	0.0523	< LOD	0.008	0.0125	0.0033	0.0043	0.0013	0.0204	0.0016	< LOD	0.0005	< LOD	0.0006	0.0022	0.0007
5968	09-28-2018 15:38	NAM-MS24	sample	GeoChem	GeoChem Trace	DualSoil	DualSoil	120	Passed	2.2661	1.05	8.3175	0.3204	33.5972	0.396	0.1596	0.034	< LOD	0.0175	0.6411	0.0164	0.1539	0.01	2.6515	0.0256	1.483	0.0137	< LOD	0.0039	< LOD	0.0033	0.9577	0.0169	14.6247	0.0527	< LOD	0.0077	0.0155	0.0035	0.0042	0.0013	0.0223	0.0017	< LOD	0.0005	< LOD	0.0006	0.0017	0.0008
5969	09-28-2018 15:41	NAM-MS24	sample	GeoChem	GeoChem Trace	DualSoil	DualSoil	120	Passed	2.4673	1.0929	8.2719	0.3183	34.6649	0.4008	0.1312	0.0332	0.0552	0.0176	0.6253	0.0159	0.1725	0.0097	2.9187	0.0264	0.9411	0.011	0.0187	0.0034	0.035	0.0035	0.9701	0.0171	13.892	0.0514	< LOD	0.0073	0.0147	0.0034	0.0059	0.0014	0.0229	0.0017	< LOD	0.0005	< LOD	0.0006	0.0028	0.0008
5970	09-28-2018 15:54	Granite AC-E	CRM	GeoChem	GeoChem Trace	DualSoil	DualSoil	120	Passed	< LOD	0.7137	13.7094	0.3626	68.5395	0.5685	< LOD	0.023	< LOD	0.0109	0.0168	0.0151	4.2344	0.0311	0.4388	0.0121	0.0451	0.003	0.002	0.0012	0.0076	0.0016	0.0442	0.0045	1.5754	0.0169	0	0	< LOD	0.0012	0.0019	0.0007	0.0206	0.0011	< LOD	0.0005	< LOD	0.0004	0.0149	0.0006
5972	09-28-2018 15:57	Granite AC-E	CRM	GeoChem	GeoChem Trace	DualSoil	DualSoil	120	Passed	< LOD	0.7144	13.7774	0.3638	68.6532	0.5691	< LOD	0.0231	< LOD	0.0109	< LOD	0.0151	4.2442	0.0311	0.4344	0.0121	0.0454	0.003	0.0014	0.0012	0.0066	0.0016	0.045	0.0045	1.5804	0.0169	0	0	< LOD	0.0012	0.0022	0.0007	0.0199	0.0011	0.0007	0.0005	< LOD	0.0004	0.0147	0.0006
5973	09-28-2018 16:00	Granite AC-E	CRM	GeoChem	GeoChem Trace	DualSoil	DualSoil	120	Passed	< LOD	0.7282	13.7924	0.3641	68.6673	0.5693	< LOD	0.0231	< LOD	0.0111	< LOD	0.0152	4.2159	0.0311	0.4494	0.0122	0.0438	0.003	0.0015	0.0012	0.0074	0.0016	0.0432	0.0045	1.5874	0.017	0	0	< LOD	0.0012	0.0018	0.0007	0.0209	0.0011	< LOD	0.0004	< LOD	0.0004	0.0152	0.0006
5974	09-28-2018 16:03	Granite AC-E	CRM	GeoChem	GeoChem Trace	DualSoil	DualSoil	120	Passed	< LOD	0.6989	13.8358	0.3633	68.4637	0.5678	< LOD	0.0227	< LOD	0.0108	< LOD	0.0152	4.2531	0.0312	0.4272	0.012	0.0433	0.003	0.0013	0.0012	0.007	0.0016	0.0432	0.0046	1.5794	0.0169	0	0	< LOD	0.0013	0.0019	0.0007	0.0209	0.0011	< LOD	0.0004	< LOD	0.0004	0.0148	0.0006
5975	09-28-2018 16:05	Granite AC-E	CRM	GeoChem	GeoChem Trace	DualSoil	DualSoil	120	Passed	< LOD	0.7125	14.0676	0.3665	68.6379	0.5687	< LOD	0.023	< LOD	0.0109	< LOD	0.0152	4.2379	0.0311	0.4336	0.012	0.0451	0.003	< LOD	0.0012	0.006	0.0016	0.0423	0.0045	1.5725	0.0169	0	0	< LOD	0.0012	0.0019	0.0007	0.0206	0.0011	< LOD	0.0004	< LOD	0.0004	0.0146	0.0006
5976	09-28-2018 16:08	NAM-MS10	cal sample	GeoChem	GeoChem Trace	DualSoil	DualSoil	121	Passed	2.2497	1.2083	6.1728	0.3068	15.238	0.2764	< LOD	0.0411	< LOD	0.0225	0.5196	0.0143	0.0749	0.0099	1.5466	0.0215	7.1026	0.0314	< LOD	0.0084	< LOD	0.0049	1.0133	0.0173	23.1428	0.0696	0.0522	0.0144	0.0272	0.0065	0.0099	0.0025	0.0223	0.0023	< LOD	0.0006	< LOD	0.001	0.0034	0.0011
5977	09-28-2018 16:11	NAM-MS10	cal sample	GeoChem	GeoChem Trace	DualSoil	DualSoil	120	Passed	2.1407	1.1492	5.8853	0.3061	14.6526	0.2746	< LOD	0.0419	< LOD	0.0226	0.5295	0.015	0.0874	0.0105	1.5038	0.0216	7.1905	0.0321	< LOD	0.0086	< LOD	0.0052	0.9335	0.0167	23.8406	0.0708	0.0701	0.0149	0.0317	0.0067	0.0099	0.0025	0.0285	0.0025	< LOD	0.0007	< LOD	0.0009	0.0034	0.0011
5978	09-28-2018 16:14	NAM-MS10	cal sample	GeoChem	GeoChem Trace	DualSoil	DualSoil	120	Passed	2.4695	1.2257	7.0123	0.3242	16.6261	0.2901	< LOD	0.0373	< LOD	0.0223	0.4799	0.0151	0.0662	0.0101	1.4701	0.0212	6.5062	0.0301	< LOD	0.0081	< LOD	0.005	1.0096	0.0172	22.6282	0.0684	0.0519	0.0139	0.0272	0.0059	0.0094	0.0022	0.0232	0.0022	< LOD	0.0006	< LOD	0.0009	0.0033	0.0011
5979	09-28-2018 16:16	NAM-MS10	cal sample	GeoChem	GeoChem Trace	DualSoil	DualSoil	120	Passed	1.807	1.1705	6.4479	0.3163	16.3567	0.2884	< LOD	0.0405	< LOD	0.022	0.521	0.0148	0.0801	0.0103	1.7027	0.0226	6.533	0.0303	< LOD	0.0081	< LOD	0.0051	1.0798	0.0179	22.824	0.0689	0.0459	0.0141	0.027	0.0063	0.0093	0.0024	0.0217	0.0023	< LOD	0.0006	< LOD	0.0009	0.0033	0.0011
5980	09-28-2018 16:19	NAM-MS10	cal sample	GeoChem	GeoChem Trace	DualSoil	DualSoil	120	Passed	1.9713	1.1714	7.1353	0.3243	17.1996	0.2944	< LOD	0.0397	< LOD	0.022	0.516	0.0146	0.0965	0.0104	1.6363	0.0221	5.9179	0.0286	< LOD	0.0077	< LOD	0.0052	1.0332	0.0175	22.5868	0.0681	0.0387	0.0138	0.0315	0.006	0.0102	0.0022	0.0277	0.0023	< LOD	0.0006	< LOD	0.0008	0.0033	0.001
5981	09-28-2018 16:22	NAM-MS6	cal sample	GeoChem	GeoChem Trace	DualSoil	DualSoil	120	Passed	2.0412	1.1639	5.7972	0.3019	17.2101	0.2939	< LOD	0.0396	< LOD	0.0212	0.5327	0.0147	0.0705	0.0098	1.1626	0.0192	5.4977	0.0278	< LOD	0.0074	< LOD	0.0047	1.0117	0.0173	24.2565	0.07	0.0558	0.0147	0.0301	0.0066	0.0086	0.0024	0.0584	0.0034	< LOD	0.0007	< LOD	0.0009	0.0043	0.0012
5982	09-28-2018 16:24	NAM-MS6	cal sample	GeoChem	GeoChem Trace	DualSoil	DualSoil	121	Passed	1.9472	1.1659	5.5695	0.2936	19.1993	0.3065	< LOD	0.0397	< LOD	0.021	0.5078	0.015	0.0741	0.0099	1.2733	0.0197	5.3689	0.027	< LOD	0.0072	< LOD	0.005	0.9585	0.0169	22.4962	0.0674	0.0369	0.0137	0.0324	0.0067	0.0081	0.0025	0.0686	0.0037	< LOD	0.0007	< LOD	0.0009	0.0034	0.0012
5983	09-28-2018 16:27	NAM-MS6	cal sample	GeoChem	GeoChem Trace	DualSoil	DualSoil	120	Passed	2.1327	1.2003	5.7655	0.3018	17.4827	0.2965	< LOD	0.0398	< LOD	0.0214	0.4838	0.0146	0.0676	0.0099	1.1289	0.019	5.6636	0.0282	< LOD	0.0075	< LOD	0.0048	0.9586	0.0168	24.3092	0.0702	0.0576	0.0146	0.0356	0.0068	0.0102	0.0025	0.0372	0.0028	< LOD	0.0007	< LOD	0.001	0.0038	0.0012
5984	09-28-2018 16:29	NAM-MS6	cal sample	GeoChem	GeoChem Trace	DualSoil	DualSoil	121	Passed	2.2111	1.2074	6.0064	0.3037	14.7622	0.2726	< LOD	0.0384	< LOD	0.0218	0.5724	0.0155	0.0559	0.0099	1.2355	0.0198	6.3438	0.03	< LOD	0.0081	< LOD	0.0053	0.9369	0.0167	25.6026	0.0726	0.0783	0.0155	0.0363	0.0073	0.0078	0.0024	0.0373	0.0029	< LOD	0.0007	< LOD	0.001	0.0046	0.0012
5985	09-28-2018 16:32	NAM-MS6	cal sample	GeoChem	GeoChem Trace	DualSoil	DualSoil	120	Passed	2.2946	1.1754	5.8209	0.3046	17.6584	0.2986	< LOD	0.0413	< LOD	0.0216	0.4898	0.0155	0.0599	0.0099	1.3375	0.0204	5.6638	0.0283	< LOD	0.0076	< LOD	0.0054	0.9729	0.017	23.9999	0.0699	0.054	0.0144	0.0361	0.0067	0.0095	0.0025	0.0766	0.0038	< LOD	0.0007	< LOD	0.001	0.0043	0.0012
5986	09-28-2018 16:35	NAM-MS38	sample	GeoChem	GeoChem Trace	DualSoil	DualSoil	120	Passed	2.2379	1.0226	5.9213	0.2793	31.6943	0.3828	0.1602	0.0391	0.1097	0.0198	1.0443	0.0176	0.2245	0.0107	1.9476	0.0224	3.2752	0.0199	< LOD	0.005	< LOD	0.0033	0.7886	0.0154	14.2517	0.0528	< LOD	0.0081	0.0171	0.0039	0.0051	0.0017	0.0142	0.0016	< LOD	0.0006	< LOD	0.0007	0.003	0.0008
5987	09-28-2018 16:38	NAM-MS38	sample	GeoChem	GeoChem Trace	DualSoil	DualSoil	120	Passed	2.035	1.0453	6.26	0.2883	36.233	0.4103	0.0737	0.0374	0.0662	0.0201	1.0148	0.0183	0.2625	0.0113	1.7862	0.0214	2.7061	0.0178	< LOD	0.0044	< LOD	0.0032	0.7554	0.0151	13.44	0.0507	< LOD	0.007	0.0138	0.0034	0.0058	0.0015	0.0275	0.0019	< LOD	0.0005	< LOD	0.0006	0.0032	0.0008
5988	09-28-2018 16:40	NAM-MS38	sample	GeoChem	GeoChem Trace	DualSoil	DualSoil	120	Passed	2.6808	1.1282	5.7716	0.2847	31.9146	0.3865	0.0485	0.0413	< LOD	0.0208	1.0203	0.0183	0.2327	0.0115	1.8682	0.0222	3.244	0.0199	< LOD	0.0051	< LOD	0.0035	0.7956	0.0155	14.3202	0.0528	< LOD	0.0082	0.0201	0.004	0.0061	0.0017	0.0146	0.0016	< LOD	0.0005	< LOD	0.0007	0.0033	0.0008
5989	09-28-2018 16:43	NAM-MS38	sample	GeoChem	GeoChem Trace	DualSoil	DualSoil	120	Passed	2.1593	1.1199	5.9076	0.2851	32.7487	0.3907	0.1194	0.0418	0.0227	0.0206	0.8685	0.0175	0.3106	0.0123	2.022	0.023	3.0734	0.0193	< LOD	0.0049	< LOD	0.0034	0.8176	0.0157	13.9228	0.0521	< LOD	0.0079	0.0136	0.0037	0.006	0.0017	0.015	0.0016	< LOD	0.0006	< LOD	0.0007	0.0033	0.0008
5990	09-28-2018 16:45	NAM-MS38	sample	GeoChem	GeoChem Trace	DualSoil	DualSoil	120	Passed	1.823	1.0558	6.2	0.2871	37.432	0.4172	0.2354	0.0386	0.0709	0.0192	0.9285	0.0183	0.2656	0.0112	2.1387	0.0231	2.2429	0.0163	< LOD	0.0041	< LOD	0.0033	0.7435	0.015	13.4559	0.0508	< LOD	0.0068	0.0149	0.0035	0.0045	0.0014	0.016	0.0016	< LOD	0.0005	< LOD	0.0007	0.0028	0.0008
5991	09-28-2018 16:48	NAM-MS30	sample	GeoChem	GeoChem Trace	DualSoil	DualSoil	120	Passed	1.9928	0.8292	4.2836	0.2343	60.2454	0.526	0.1247	0.0262	0.0358	0.0137	0.8056	0.0192	1.0983	0.0171	1.7273	0.0198	0.7402	0.0087	< LOD	0.0019	< LOD	0.002	0.2274	0.0087	4.5812	0.0291	< LOD	0.0014	< LOD	0.0015	0.0031	0.0007	0.0044	0.0007	< LOD	0.0004	< LOD	0.0004	0.0045	0.0005
5992	09-28-2018 16:51	NAM-MS30	sample	GeoChem	GeoChem Trace	DualSoil	DualSoil	120	Passed	1.236	0.7955	4.3818	0.2333	60.6203	0.5258	0.171	0.0256	0.0754	0.0137	0.7965	0.0184	0.9422	0.0159	1.6685	0.0194	0.6754	0.0083	0.0037	0.0018	< LOD	0.0018	0.1873	0.0079	4.0814	0.0274	< LOD	0.0013	< LOD	0.0015	0.0029	0.0007	0.0034	0.0006	< LOD	0.0004	< LOD	0.0004	0.0049	0.0005
5993	09-28-2018 16:53	NAM-MS30	sample	GeoChem	GeoChem Trace	DualSoil	DualSoil	120	Passed	2.1358	0.9259	4.4478	0.2413	54.4141	0.4994	0.2209	0.031	0.0891	0.0155	0.9779	0.0197	0.7263	0.0147	2.271	0.0227	1.4198	0.0121	< LOD	0.0026	< LOD	0.0022	0.2855	0.0097	6.6727	0.0356	< LOD	0.0025	0.0026	0.0018	0.0035	0.0008	0.0046	0.0008	< LOD	0.0004	< LOD	0.0004	0.0046	0.0006
5994	09-28-2018 16:56	NAM-MS30	sample	GeoChem	GeoChem Trace	DualSoil	DualSoil	120	Passed	1.1646	0.7859	4.3295	0.2312	63.5214	0.5408	0.1857	0.0249	0.0443	0.0127	0.7624	0.019	0.9632	0.0159	1.4951	0.0184	0.5848	0.0077	0.0018	0.0016	0.0075	0.0018	0.1584	0.0074	3.8994	0.0267	< LOD	0.001	< LOD	0.0014	0.0032	0.0007	0.0033	0.0006	< LOD	0.0004	< LOD	0.0004	0.0047	0.0005
5995	09-28-2018 16:58	NAM-MS30	sample	GeoChem	GeoChem Trace	DualSoil	DualSoil	122	Passed	1.3168	0.802	4.1472	0.2276	62.4179	0.5273	0.1939	0.0257	0.0688	0.0132	0.818	0.0187	1.0057	0.016	1.5504	0.0185	0.5789	0.0075	< LOD	0.0016	0.0069	0.0018	0.1699	0.0077	4.2547	0.0279	< LOD	0.0011	< LOD	0.0015	0.0029	0.0007	0.0035	0.0006	< LOD	0.0004	< LOD	0.0004	0.0053	0.0005
5996	09-28-2018 17:01	NAM-MS35	sample	GeoChem	GeoChem Trace	DualSoil	DualSoil	120	Passed	2.3966	0.9329	4.8852	0.2461	53.107	0.4906	0.3473	0.0333	0.0942	0.0152	0.881	0.0183	0.5262	0.0129	2.3332	0.0228	1.3448	0.0118	< LOD	0.0026	< LOD	0.002	0.395	0.0112	5.5759	0.0325	< LOD	0.0024	0.002	0.0017	0.0031	0.0008	0.0075	0.0008	< LOD	0.0004	< LOD	0.0004	0.0039	0.0005
5997	09-28-2018 17:04	NAM-MS35	sample	GeoChem	GeoChem Trace	DualSoil	DualSoil	120	Passed	2.5921	0.9855	5.1933	0.2519	50.2447	0.4759	0.2753	0.0329	0.0843	0.0157	0.9225	0.0184	0.4597	0.0125	2.8172	0.025	1.3963	0.0122	< LOD	0.0028	0.0022	0.0022	0.3759	0.011	5.7739	0.0333	< LOD	0.0028	0.0025	0.0017	0.0031	0.0008	0.009	0.0009	< LOD	0.0004	< LOD	0.0004	0.004	0.0005
5998	09-28-2018 17:07	NAM-MS35	sample	GeoChem	GeoChem Trace	DualSoil	DualSoil	120	Passed	2.2919	0.968	5.3156	0.2564	47.5285	0.4639	0.5223	0.0388	0.0969	0.0164	0.8674	0.0185	0.3706	0.0117	3.0288	0.0261	2.0347	0.0147	< LOD	0.0033	< LOD	0.0024	0.4625	0.0122	6.8756	0.0367	< LOD	0.0034	0.0051	0.0019	0.0033	0.0009	0.0111	0.001	< LOD	0.0004	< LOD	0.0004	0.0039	0.0006
5999	09-28-2018 17:09	NAM-MS35	sample	GeoChem	GeoChem Trace	DualSoil	DualSoil	120	Passed	1.7319	0.8816	4.4044	0.2349	57.3886	0.51	0.2199	0.0301	0.0844	0.015	0.8903	0.0186	0.386	0.0115	2.1273	0.0217	1.1106	0.0106	< LOD	0.0023	< LOD	0.0019	0.2948	0.0098	4.2116	0.0281	< LOD	0.0017	< LOD	0.0015	0.0025	0.0007	0.0082	0.0008	< LOD	0.0004	< LOD	0.0004	0.004	0.0005
6000	09-28-2018 17:12	NAM-MS35	sample	GeoChem	GeoChem Trace	DualSoil	DualSoil	121	Passed	2.3769	0.8762	4.8069	0.2406	52.9958	0.4858	0.5372	0.0365	0.1274	0.0154	0.8364	0.0178	0.4727	0.0123	2.5995	0.0238	1.2877	0.0115	< LOD	0.0026	< LOD	0.002	0.3731	0.011	5.2401	0.0317	< LOD	0.0024	0.002	0.0016	0.0028	0.0007	0.0081	0.0008	< LOD	0.0004	< LOD	0.0004	0.0041	0.0005
6001	09-28-2018 17:26	NAM-MS33	sample	GeoChem	GeoChem Trace	DualSoil	DualSoil	120	Passed	1.9778	0.925	4.9258	0.2489	46.4707	0.458	0.3515	0.0368	0.1794	0.0176	0.9003	0.0183	0.5349	0.0133	3.4515	0.0277	1.9102	0.0145	< LOD	0.0033	0.0232	0.0027	0.4189	0.0117	7.1125	0.0375	< LOD	0.0036	0.0073	0.0022	0.0035	0.001	0.0117	0.0011	< LOD	0.0004	< LOD	0.0005	0.0041	0.0006
6002	09-28-2018 17:29	NAM-MS33	sample	GeoChem	GeoChem Trace	DualSoil	DualSoil	120	Passed	2.7011	1.0119	5.2671	0.2587	42.7711	0.4407	0.5262	0.0413	0.1962	0.0181	0.8201	0.0175	0.3474	0.0116	3.7156	0.0289	2.1966	0.0158	< LOD	0.0037	0.0033	0.0027	0.5002	0.0127	8.377	0.041	< LOD	0.0044	0.0084	0.0024	0.0041	0.0011	0.0128	0.0012	< LOD	0.0004	< LOD	0.0005	0.0033	0.0006
6003	09-28-2018 17:31	NAM-MS33	sample	GeoChem	GeoChem Trace	DualSoil	DualSoil	120	Passed	2.558	0.9594	4.6859	0.2467	49.0698	0.4728	0.5272	0.0389	0.1611	0.0167	0.8403	0.0184	0.5055	0.0129	3.562	0.028	1.7863	0.0139	< LOD	0.0031	0.0078	0.0024	0.3848	0.0112	6.8412	0.0368	< LOD	0.0032	0.0049	0.002	0.0033	0.0009	0.0127	0.0011	< LOD	0.0004	< LOD	0.0004	0.0034	0.0006
6004	09-28-2018 17:34	NAM-MS33	sample	GeoChem	GeoChem Trace	DualSoil	DualSoil	120	Passed	3.1148	0.9778	5.1474	0.2541	45.2485	0.4531	0.5401	0.0401	0.2258	0.0177	0.8888	0.0176	0.4321	0.0124	3.9906	0.0297	1.8736	0.0145	< LOD	0.0034	< LOD	0.0025	0.4477	0.012	7.6107	0.039	< LOD	0.0039	0.0071	0.0022	0.0036	0.001	0.014	0.0012	< LOD	0.0004	< LOD	0.0005	0.0027	0.0006
6005	09-28-2018 17:36	NAM-MS33	sample	GeoChem	GeoChem Trace	DualSoil	DualSoil	120	Passed	3.2373	1.1105	5.5147	0.2659	41.8532	0.4379	0.6176	0.0433	0.1859	0.0188	0.7222	0.0173	0.2617	0.011	3.8586	0.0296	2.2762	0.0162	< LOD	0.0039	< LOD	0.0028	0.5379	0.0131	8.8598	0.0422	< LOD	0.0047	0.0078	0.0023	0.0035	0.001	0.0163	0.0012	< LOD	0.0004	< LOD	0.0005	0.0029	0.0006
6006	09-28-2018 17:40	CS-M2	cal std	GeoChem	GeoChem Trace	DualSoil	DualSoil	60	Passed	1.1653	1.0735	12.8758	0.5071	72.2077	0.8378	0.0554	0.0317	0.1227	0.0195	< LOD	0.022	4.8211	0.0469	0.9272	0.0221	0.1535	0.0057	< LOD	0.0017	0.0078	0.0023	0.0905	0.0088	1.6005	0.0245	0	0	0.0026	0.002	0.0233	0.002	0.0733	0.003	0.007	0.0019	< LOD	0.0006	0.0144	0.0009
6007	09-28-2018 17:41	CS-M2	cal std	GeoChem	GeoChem Trace	DualSoil	DualSoil	61	Passed	< LOD	1.0402	12.9349	0.4983	72.3899	0.8253	0.0711	0.0312	0.1284	0.0192	< LOD	0.0217	4.8028	0.0461	0.9107	0.0217	0.1487	0.0056	< LOD	0.0016	0.0075	0.0023	0.1002	0.0089	1.6206	0.0246	0	0	0.0038	0.0021	0.0226	0.0019	0.0753	0.003	0.008	0.0019	< LOD	0.0006	0.0143	0.0009
6008	09-28-2018 17:43	CS-M2	cal std	GeoChem	GeoChem Trace	DualSoil	DualSoil	60	Passed	< LOD	1.0835	12.9226	0.5073	72.4142	0.8394	0.0544	0.0312	0.1269	0.0197	< LOD	0.022	4.8436	0.047	0.9428	0.0223	0.1517	0.0058	< LOD	0.0017	0.0069	0.0023	0.0954	0.0088	1.5975	0.0244	0	0	0.0025	0.002	0.0236	0.002	0.0743	0.003	0.0059	0.0018	< LOD	0.0006	0.0148	0.0009
6009	09-28-2018 17:44	CS-M2	cal std	GeoChem	GeoChem Trace	DualSoil	DualSoil	61	Passed	< LOD	1.0636	12.9415	0.4994	72.309	0.8249	0.0726	0.0316	0.1308	0.0193	< LOD	0.0216	4.8223	0.0462	0.9226	0.0217	0.1525	0.0057	< LOD	0.0017	0.0084	0.0023	0.0942	0.0089	1.5878	0.0244	0	0	< LOD	0.0019	0.022	0.0019	0.0711	0.0029	0.0072	0.0018	< LOD	0.0006	0.0146	0.0009
6010	09-28-2018 17:46	CS-M2	cal std	GeoChem	GeoChem Trace	DualSoil	DualSoil	62	Passed	< LOD	1.0486	12.7635	0.4891	72.8212	0.8158	0.0562	0.0298	0.1358	0.019	< LOD	0.0211	4.85	0.0455	0.9147	0.0213	0.1543	0.0056	< LOD	0.0016	0.0074	0.0023	0.0952	0.0088	1.618	0.0246	0	0	0.0025	0.002	0.0223	0.0019	0.0721	0.0029	0.0078	0.0018	< LOD	0.0006	0.0139	0.0009
6011	09-28-2018 17:48	CS-M2	cal std	GeoChem	GeoChem Trace	DualSoil	DualSoil	61	Passed	< LOD	1.0351	12.9393	0.4985	72.7688	0.8286	0.0628	0.0305	0.1273	0.0191	< LOD	0.0218	4.8555	0.0463	0.9326	0.0218	0.1533	0.0057	< LOD	0.0016	0.0058	0.0023	0.1008	0.0091	1.603	0.0245	0	0	0.0027	0.002	0.0226	0.0019	0.075	0.003	0.0069	0.0018	< LOD	0.0006	0.0145	0.0009
6012	09-28-2018 17:49	CS-M2	cal std	GeoChem	GeoChem Trace	DualSoil	DualSoil	60	Passed	< LOD	1.0811	12.7877	0.5056	72.5464	0.8404	0.0653	0.0315	0.1304	0.0197	< LOD	0.022	4.7931	0.0468	0.9385	0.0222	0.1579	0.0058	< LOD	0.0017	0.0088	0.0023	0.0953	0.0088	1.607	0.0245	0	0	0.003	0.002	0.0225	0.0019	0.0718	0.0029	0.0058	0.0018	< LOD	0.0006	0.0137	0.0009
6013	09-28-2018 17:51	CS-M2	cal std	GeoChem	GeoChem Trace	DualSoil	DualSoil	60	Passed	< LOD	1.0966	12.6614	0.5042	72.8282	0.8432	0.0681	0.0313	0.1257	0.0193	< LOD	0.0218	4.8679	0.0471	0.9324	0.0221	0.1522	0.0058	< LOD	0.0016	0.007	0.0023	0.0992	0.0089	1.6189	0.0246	0	0	0.0027	0.002	0.022	0.0019	0.074	0.0029	0.007	0.0018	< LOD	0.0006	0.0141	0.0009
6014	09-28-2018 17:52	CS-M2	cal std	GeoChem	GeoChem Trace	DualSoil	DualSoil	61	Passed	< LOD	1.0188	13.0267	0.5003	72.6862	0.8278	0.0548	0.0304	0.1139	0.0188	< LOD	0.0216	4.7948	0.046	0.9166	0.0216	0.1505	0.0056	< LOD	0.0016	0.0086	0.0023	0.0943	0.0088	1.6149	0.0245	0	0	< LOD	0.0019	0.0234	0.0019	0.0714	0.0029	0.0067	0.0018	< LOD	0.0006	0.0144	0.0009
6015	09-28-2018 17:54	CS-M2	cal std	GeoChem	GeoChem Trace	DualSoil	DualSoil	61	Passed	< LOD	1.0484	13.1553	0.5022	72.7299	0.828	0.0751	0.0309	0.1207	0.019	< LOD	0.0218	4.853	0.0463	0.9244	0.0217	0.1544	0.0057	< LOD	0.0016	0.0064	0.0023	0.095	0.0088	1.5868	0.0243	0	0	0.002	0.0019	0.0221	0.0019	0.0738	0.0029	0.0082	0.0018	< LOD	0.0006	0.0139	0.0009
6016	09-28-2018 17:56	CS-M2	cal std	GeoChem	GeoChem Trace			60.7	Passed	< LOD	1.059	12.9009	0.5012	72.5701	0.8311	0.0636	0.031	0.1262	0.0193	< LOD	0.0217	4.8304	0.0464	0.9262	0.0219	0.1529	0.0057	< LOD	0.0016	0.0075	0.0023	0.096	0.0089	1.6055	0.0245	0	0	0.0025	0.002	0.0226	0.0019	0.0732	0.0029	0.0071	0.0018	< LOD	0.0006	0.0143	0.0009
6017	2018-01-10 09:07:00	CS-M2	cal std	GeoChem	GeoChem Trace	DualSoil	DualSoil	60	Passed	< LOD	1.0124	12.2433	0.4958	71.7261	0.8346	0.0696	0.0305	0.1344	0.0196	< LOD	0.0215	4.8363	0.047	0.9541	0.0224	0.1559	0.0059	< LOD	0.0017	0.0058	0.0023	0.0979	0.0089	1.6085	0.0245	0	0	0.0022	0.002	0.0237	0.002	0.0749	0.003	0.0057	0.0018	< LOD	0.0006	0.0145	0.0009
6018	2018-01-10 09:17:00	CS-M2	cal std	GeoChem	GeoChem Trace	DualSoil	DualSoil	60	Passed	< LOD	1.0514	12.4664	0.5014	71.6697	0.8347	0.0589	0.0311	0.1208	0.0194	< LOD	0.0218	4.8328	0.047	0.95	0.0223	0.157	0.0059	< LOD	0.0017	0.0069	0.0023	0.0928	0.0088	1.6179	0.0246	0	0	< LOD	0.0019	0.0222	0.0019	0.072	0.0029	0.0067	0.0018	< LOD	0.0006	0.0144	0.0009
6019	2018-01-10 09:18:00	CS-M2	cal std	GeoChem	GeoChem Trace	DualSoil	DualSoil	60	Passed	< LOD	1.0108	12.5336	0.5007	71.8479	0.8358	0.0639	0.0308	0.1339	0.0196	< LOD	0.0218	4.835	0.047	0.9413	0.0222	0.1579	0.0058	< LOD	0.0017	0.0078	0.0023	0.0949	0.0089	1.6224	0.0246	0	0	0.0026	0.002	0.0229	0.0019	0.0721	0.0029	0.0074	0.0018	< LOD	0.0005	0.0142	0.0009
6020	2018-01-10 09:20:00	CS-M2	cal std	GeoChem	GeoChem Trace	DualSoil	DualSoil	60	Passed	< LOD	1.0904	12.427	0.5007	71.9502	0.837	0.0764	0.031	0.1225	0.0191	< LOD	0.0219	4.8455	0.0471	0.9349	0.0222	0.1544	0.0058	< LOD	0.0017	0.0078	0.0023	0.0941	0.0088	1.6401	0.0247	0	0	< LOD	0.0019	0.022	0.0019	0.0741	0.0029	0.0072	0.0018	< LOD	0.0005	0.0141	0.0009
6021	2018-01-10 09:21:00	CS-M2	cal std	GeoChem	GeoChem Trace	DualSoil	DualSoil	60	Passed	< LOD	1.0597	12.7785	0.5062	71.6795	0.8349	0.044	0.0318	0.12	0.0199	< LOD	0.0218	4.8667	0.0472	0.9337	0.0222	0.157	0.0058	< LOD	0.0017	0.0075	0.0023	0.0951	0.0089	1.6261	0.0246	0	0	< LOD	0.0019	0.0223	0.0019	0.0706	0.0028	0.0072	0.0018	< LOD	0.0005	0.014	0.0009
6022	2018-01-10 09:23:00	CS-M2	cal std	GeoChem	GeoChem Trace	DualSoil	DualSoil	60	Passed	< LOD	1.0923	12.7727	0.5066	71.8196	0.8358	0.0744	0.0319	0.12	0.0194	< LOD	0.0221	4.8754	0.0472	0.9433	0.0223	0.1588	0.0058	0.0027	0.0017	0.0099	0.0023	0.0952	0.0089	1.6079	0.0245	0	0	0.0028	0.002	0.0211	0.0018	0.0722	0.0029	0.0068	0.0018	< LOD	0.0005	0.0143	0.0009
6023	2018-01-10 09:24:00	CS-M2	cal std	GeoChem	GeoChem Trace	DualSoil	DualSoil	60	Passed	1.0829	1.0808	12.7606	0.5048	71.8827	0.836	0.0587	0.0316	0.1241	0.0195	< LOD	0.0221	4.8354	0.047	0.949	0.0223	0.1589	0.0059	< LOD	0.0017	0.0065	0.0023	0.0935	0.0088	1.618	0.0245	0	0	0.0031	0.002	0.0225	0.0019	0.0709	0.0028	0.0073	0.0018	< LOD	0.0006	0.0137	0.0009
6024	2018-01-10 09:26:00	CS-M2	cal std	GeoChem	GeoChem Trace	DualSoil	DualSoil	60	Passed	< LOD	1.0644	12.5325	0.5012	71.6583	0.834	0.0639	0.0316	0.1301	0.0199	< LOD	0.0215	4.8129	0.0469	0.9298	0.0222	0.1552	0.0058	< LOD	0.0017	0.0066	0.0023	0.0991	0.0089	1.6109	0.0245	0	0	0.0027	0.0019	0.0223	0.0019	0.0706	0.0028	0.0072	0.0018	< LOD	0.0006	0.0144	0.0009
6025	2018-01-10 09:28:00	CS-M2	cal std	GeoChem	GeoChem Trace	DualSoil	DualSoil	60	Passed	< LOD	1.0694	12.9126	0.5076	72.1154	0.8378	0.0787	0.0314	0.1308	0.0195	0.0257	0.0221	4.8776	0.0472	0.9443	0.0223	0.1463	0.0058	< LOD	0.0017	0.008	0.0023	0.0978	0.0089	1.6035	0.0244	0	0	0.0031	0.002	0.023	0.0019	0.072	0.0029	0.0063	0.0018	< LOD	0.0006	0.0143	0.0009
6026	2018-01-10 09:31:00	CS-M2	cal std	GeoChem	GeoChem Trace	DualSoil	DualSoil	60	Passed	< LOD	1.0446	12.7888	0.5052	71.8308	0.8356	0.0696	0.0318	0.1165	0.0195	< LOD	0.0222	4.8475	0.0471	0.9288	0.0222	0.1531	0.0058	< LOD	0.0017	0.0072	0.0024	0.0972	0.0089	1.61	0.0245	0	0	< LOD	0.0019	0.0239	0.0019	0.0754	0.003	0.007	0.0018	< LOD	0.0006	0.0147	0.0009
6027	2018-01-10 09:32:00	CS-M2	cal std	GeoChem	GeoChem Trace	DualSoil	DualSoil	60	Passed	< LOD	1.0733	12.6347	0.5035	71.8747	0.8362	0.0649	0.0312	0.126	0.0196	< LOD	0.0218	4.8903	0.0473	0.924	0.0223	0.156	0.0059	< LOD	0.0017	0.0061	0.0023	0.0978	0.0089	1.603	0.0244	0	0	0.0021	0.002	0.0215	0.0019	0.0728	0.0029	0.0062	0.0018	< LOD	0.0006	0.0149	0.0009
6028	2018-01-10 09:33:00	CS-M2	cal std	GeoChem	GeoChem Trace	DualSoil	DualSoil	60	Passed	< LOD	1.1156	12.6442	0.505	72.1089	0.8382	0.0499	0.0324	0.1155	0.0198	< LOD	0.0219	4.8163	0.047	0.9426	0.0223	0.1527	0.0058	< LOD	0.0017	0.0064	0.0023	0.0926	0.0088	1.6089	0.0245	0	0	0.0023	0.002	0.0228	0.0019	0.071	0.0029	0.0084	0.0018	< LOD	0.0006	0.0142	0.0009
6029	2018-01-10 09:35:00	CS-M2	cal std	GeoChem	GeoChem Trace			60	Passed	< LOD	1.0701	12.6785	0.5042	71.8768	0.8361	0.0644	0.0315	0.1239	0.0196	< LOD	0.0219	4.8503	0.0471	0.9372	0.0222	0.155	0.0058	< LOD	0.0017	0.0074	0.0023	0.0957	0.0089	1.6151	0.0245	0	0	0.0023	0.0019	0.0224	0.0019	0.0722	0.0029	0.0071	0.0018	< LOD	0.0006	0.0143	0.0009
6030	2018-01-10 09:37:00	MB060	qtz blank	GeoChem	GeoChem Trace	DualSoil	DualSoil	61	Passed	< LOD	0.7782	< LOD	0.1545	86.3214	0.9158	0.0565	0.0173	< LOD	0.0107	< LOD	0.017	< LOD	0.0065	< LOD	0.0058	< LOD	0.0029	< LOD	0.0007	0.006	0.0018	< LOD	0.0033	0.0288	0.0035	0	0	< LOD	0.0014	0.0026	0.0007	0.0011	0.0006	< LOD	0.0005	< LOD	0.0004	< LOD	0.0005
6031	2018-01-10 09:38:00	MB060	qtz blank	GeoChem	GeoChem Trace	DualSoil	DualSoil	60	Passed	< LOD	0.7979	< LOD	0.158	86.533	0.9334	0.0564	0.0169	< LOD	0.0109	< LOD	0.0175	< LOD	0.0066	< LOD	0.0065	0.0039	0.0033	< LOD	0.0007	0.0062	0.0018	< LOD	0.0033	0.0276	0.0035	0	0	< LOD	0.0014	0.0026	0.0007	0.0009	0.0005	< LOD	0.0005	< LOD	0.0004	< LOD	0.0005
6032	2018-01-10 09:40:00	MB060	qtz blank	GeoChem	GeoChem Trace	DualSoil	DualSoil	60	Passed	0.9581	0.7676	< LOD	0.1568	86.8115	0.9359	0.0562	0.0179	< LOD	0.011	< LOD	0.0172	< LOD	0.0068	< LOD	0.006	< LOD	0.0029	< LOD	0.0006	0.0043	0.0019	< LOD	0.0033	0.0259	0.0034	0	0	< LOD	0.0015	0.0024	0.0007	0.0007	0.0005	< LOD	0.0005	< LOD	0.0004	< LOD	0.0005
6033	2018-01-10 09:41:00	MB060	qtz blank	GeoChem	GeoChem Trace	DualSoil	DualSoil	60	Passed	< LOD	0.7856	< LOD	0.158	86.3756	0.9316	0.057	0.0182	< LOD	0.0109	< LOD	0.0173	< LOD	0.0065	< LOD	0.0065	0.0039	0.0033	< LOD	0.0007	0.0063	0.0018	< LOD	0.0032	0.0272	0.0035	0	0	< LOD	0.0015	0.002	0.0007	0.0006	0.0005	< LOD	0.0005	< LOD	0.0004	< LOD	0.0005
6034	2018-01-10 09:43:00	MB060	qtz blank	GeoChem	GeoChem Trace	DualSoil	DualSoil	60	Passed	< LOD	0.7639	< LOD	0.1576	87.2098	0.9398	0.0571	0.0144	< LOD	0.0112	< LOD	0.0171	< LOD	0.0067	< LOD	0.0066	< LOD	0.0034	< LOD	0.0006	0.0044	0.0018	0.0033	0.0033	0.0283	0.0036	0	0	< LOD	0.0015	0.0026	0.0007	0.0006	0.0006	< LOD	0.0005	< LOD	0.0004	< LOD	0.0005
6035	2018-01-10 09:45:00	CRM3	CRM	GeoChem	GeoChem Trace	DualSoil	DualSoil	120	Passed	< LOD	0.6789	15.9162	0.3753	67.5592	0.5551	0.0401	0.0181	< LOD	0.0103	< LOD	0.0144	3.4292	0.0279	0.4868	0.0121	< LOD	0.0023	< LOD	0.0012	0.022	0.0017	0.1284	0.0067	0.3294	0.0079	0	0	< LOD	0.0011	0.0017	0.0006	0.0089	0.0007	< LOD	0.0005	< LOD	0.0003	0.2375	0.0019
6036	2018-01-10 09:48:00	CRM3	CRM	GeoChem	GeoChem Trace	DualSoil	DualSoil	120	Passed	< LOD	0.6873	15.7707	0.3738	67.2691	0.5535	0.0371	0.0181	< LOD	0.0102	< LOD	0.0142	3.3968	0.0278	0.4839	0.0122	< LOD	0.0024	0.0013	0.0012	0.0216	0.0017	0.1283	0.0067	0.3278	0.0079	0	0	< LOD	0.0011	0.0019	0.0006	0.0091	0.0008	< LOD	0.0005	< LOD	0.0004	0.2392	0.0019
6037	2018-01-10 09:50:00	CRM3	CRM	GeoChem	GeoChem Trace	DualSoil	DualSoil	120	Passed	< LOD	0.6748	15.5323	0.371	67.1703	0.5528	0.0401	0.0182	< LOD	0.0102	< LOD	0.0141	3.3262	0.0275	0.4952	0.0122	< LOD	0.0024	< LOD	0.0012	0.0205	0.0017	0.1255	0.0066	0.3245	0.0079	0	0	< LOD	0.0011	0.0024	0.0006	0.0089	0.0008	< LOD	0.0005	< LOD	0.0003	0.2371	0.0019
6038	2018-01-10 09:53:00	CRM3	CRM	GeoChem	GeoChem Trace	DualSoil	DualSoil	120	Passed	< LOD	0.6894	15.8611	0.3749	67.401	0.5541	0.0317	0.0178	< LOD	0.0103	< LOD	0.0144	3.3327	0.0275	0.5018	0.0122	< LOD	0.0024	< LOD	0.0012	0.019	0.0017	0.1243	0.0066	0.319	0.0078	0	0	< LOD	0.0011	0.0021	0.0006	0.0091	0.0007	< LOD	0.0005	< LOD	0.0003	0.2363	0.0019
6039	2018-01-10 09:55:00	CRM3	CRM	GeoChem	GeoChem Trace	DualSoil	DualSoil	120	Passed	< LOD	0.676	15.6566	0.3724	67.8708	0.5568	0.0447	0.0179	< LOD	0.0101	< LOD	0.0143	3.3506	0.0276	0.4975	0.0122	< LOD	0.0023	0.0013	0.0012	0.0227	0.0017	0.1262	0.0067	0.3193	0.0078	0	0	< LOD	0.001	0.002	0.0006	0.0091	0.0007	< LOD	0.0005	< LOD	0.0004	0.2367	0.0019
6040	2018-01-10 09:59:00	NAM-MS40	cal sample	GeoChem	GeoChem Trace	DualSoil	DualSoil	120	Passed	1.9224	0.9048	5.9227	0.2696	51.0147	0.4847	0.3508	0.0359	< LOD	0.0156	0.7978	0.0192	0.7729	0.0153	1.7207	0.0203	1.1584	0.0111	< LOD	0.0026	0.0035	0.0025	0.4628	0.012	8.1498	0.0388	< LOD	0.0032	0.0051	0.0023	0.004	0.0011	0.0132	0.0013	< LOD	0.0006	< LOD	0.0006	0.0048	0.0007
6041	2018-01-10 10:01:00	NAM-MS40	cal sample	GeoChem	GeoChem Trace	DualSoil	DualSoil	120	Passed	1.1389	0.8359	5.0684	0.2576	51.9204	0.4902	0.452	0.0375	0.034	0.0151	0.7242	0.0183	0.7243	0.0148	1.8718	0.0211	1.1738	0.0113	< LOD	0.0026	0.0245	0.0027	0.5101	0.0126	9.0067	0.0409	< LOD	0.0033	0.0059	0.0024	0.0045	0.0011	0.0084	0.0011	< LOD	0.0006	< LOD	0.0006	0.0048	0.0007
6042	2018-01-10 10:04:00	NAM-MS40	cal sample	GeoChem	GeoChem Trace	DualSoil	DualSoil	120	Passed	1.7583	0.8826	4.4185	0.2394	56.1955	0.5088	0.362	0.034	0.0299	0.0145	0.695	0.0183	0.5344	0.0131	1.5808	0.0194	1.0967	0.0107	< LOD	0.0023	0.0046	0.0023	0.4105	0.0113	7.2136	0.0364	< LOD	0.0024	0.0051	0.0022	0.0033	0.001	0.0099	0.0011	< LOD	0.0005	< LOD	0.0005	0.0039	0.0007
6043	2018-01-10 10:06:00	NAM-MS40	cal sample	GeoChem	GeoChem Trace	DualSoil	DualSoil	120	Passed	1.5634	0.8923	4.4719	0.2423	52.9046	0.4932	0.1553	0.0313	< LOD	0.015	0.6659	0.0182	0.4259	0.0123	1.578	0.0196	1.6268	0.013	< LOD	0.0028	0.0026	0.0024	0.4361	0.0117	7.7794	0.038	< LOD	0.003	0.007	0.0022	0.0042	0.001	0.0081	0.001	< LOD	0.0005	< LOD	0.0005	0.0036	0.0006
6044	2018-01-10 10:10:00	NAM-MS40	cal sample	GeoChem	GeoChem Trace	DualSoil	DualSoil	120	Passed	1.9754	0.856	5.0631	0.2529	54.2863	0.5015	0.3237	0.0331	0.0587	0.0143	0.6866	0.0177	0.8931	0.0159	1.6921	0.02	1.127	0.0109	0.0037	0.0024	0.0125	0.0024	0.4769	0.0122	8.1347	0.0388	< LOD	0.0028	0.0044	0.0022	0.0047	0.0011	0.008	0.0011	< LOD	0.0005	< LOD	0.0005	0.0051	0.0007
6045	2018-01-10 10:13:00	NAM-MS34a	cal sample	GeoChem	GeoChem Trace	DualSoil	DualSoil	120	Passed	1.5815	0.776	3.9537	0.2234	63.754	0.5382	0.0937	0.0232	0.183	0.0152	1.3466	0.0218	1.3052	0.0181	1.7394	0.0196	0.276	0.0055	< LOD	0.0014	0.0144	0.0017	0.1006	0.0061	1.7233	0.0179	< LOD	0.0006	< LOD	0.0013	0.0025	0.0006	0.0042	0.0006	< LOD	0.0004	< LOD	0.0003	0.0077	0.0005
6046	2018-01-10 10:16:00	NAM-MS34a	cal sample	GeoChem	GeoChem Trace	DualSoil	DualSoil	120	Passed	1.3677	0.785	3.7631	0.2196	64.7276	0.5433	0.2254	0.0261	0.1737	0.0149	1.3374	0.0218	1.159	0.0172	1.5	0.0183	0.3192	0.0059	< LOD	0.0014	0.0077	0.0017	0.0905	0.0059	1.7575	0.018	< LOD	0.0006	< LOD	0.0013	0.0022	0.0006	0.0038	0.0006	< LOD	0.0004	< LOD	0.0003	0.0066	0.0005
6047	2018-01-10 10:18:00	NAM-MS34a	cal sample	GeoChem	GeoChem Trace	DualSoil	DualSoil	120	Passed	1.2021	0.8108	5.2153	0.2449	60.6959	0.5221	0.158	0.0254	0.1834	0.0156	1.2236	0.0205	1.6019	0.0198	1.6575	0.0192	0.2669	0.0055	0.0023	0.0015	0.0051	0.0016	0.1292	0.0068	1.876	0.0186	< LOD	0.0009	< LOD	0.0013	0.0024	0.0006	0.0037	0.0006	< LOD	0.0004	< LOD	0.0003	0.0086	0.0005
6048	2018-01-10 10:30:00	NAM-MS34a	cal sample	GeoChem	GeoChem Trace	DualSoil	DualSoil	120	Passed	1.4811	0.8086	5.1989	0.2461	61.3696	0.5267	0.2371	0.0281	0.1553	0.0154	1.0713	0.0203	1.6185	0.02	1.7956	0.0199	0.3008	0.0058	< LOD	0.0016	< LOD	0.0016	0.1587	0.0074	2.0469	0.0195	< LOD	0.0008	< LOD	0.0013	0.0023	0.0006	0.0042	0.0006	< LOD	0.0004	< LOD	0.0003	0.008	0.0005
6049	2018-01-10 10:32:00	NAM-MS34a	cal sample	GeoChem	GeoChem Trace	DualSoil	DualSoil	120	Passed	1.4592	0.7837	3.3093	0.2109	65.1234	0.5451	0.3612	0.03	0.2054	0.0152	1.0747	0.0203	0.7613	0.0143	2.1475	0.0213	0.2765	0.0055	< LOD	0.0014	0.0097	0.0016	0.0992	0.0062	1.8438	0.0186	< LOD	0.0006	< LOD	0.0013	0.0023	0.0006	0.0049	0.0007	0.0004	0.0004	< LOD	0.0003	0.0051	0.0005
6050	2018-01-10 10:36:00	NAM-MS2	sample	GeoChem	GeoChem Trace	DualSoil	DualSoil	120	Passed	7.8284	1.3118	2.9343	0.2314	34.4478	0.4031	0.163	0.0446	< LOD	0.0164	0.6817	0.0169	0.2243	0.0114	6.8588	0.0393	4.5341	0.0242	< LOD	0.0058	0.0094	0.0037	0.2435	0.0093	10.326	0.0481	< LOD	0.0061	0.0198	0.0032	0.0062	0.0015	0.008	0.0011	< LOD	0.0005	< LOD	0.0006	0.0022	0.0007
6051	2018-01-10 10:38:00	NAM-MS2	sample	GeoChem	GeoChem Trace	DualSoil	DualSoil	120	Passed	6.8261	1.278	2.7847	0.227	35.7266	0.4097	0.1591	0.0434	< LOD	0.0163	0.6565	0.0165	0.1895	0.011	6.6446	0.0387	4.5721	0.0242	< LOD	0.0057	0.0095	0.0036	0.2303	0.009	9.9474	0.0471	< LOD	0.0058	0.016	0.003	0.0066	0.0014	0.0079	0.0011	< LOD	0.0005	< LOD	0.0005	0.0018	0.0007
6052	2018-01-10 10:41:00	NAM-MS2	sample	GeoChem	GeoChem Trace	DualSoil	DualSoil	120	Passed	6.2939	1.1974	3.2317	0.2277	37.1459	0.4148	0.2833	0.041	0.0602	0.0151	0.64	0.016	0.2939	0.0114	6.8703	0.039	3.9443	0.0222	0.0101	0.0052	0.0141	0.0033	0.2256	0.009	9.3602	0.0456	< LOD	0.0054	0.0159	0.0028	0.0056	0.0013	0.008	0.0011	< LOD	0.0005	< LOD	0.0005	0.0019	0.0006
6053	2018-01-10 10:43:00	NAM-MS2	sample	GeoChem	GeoChem Trace	DualSoil	DualSoil	120	Passed	6.2809	1.2612	3.3409	0.2364	34.5592	0.4034	0.2558	0.0445	0.0233	0.016	0.667	0.0172	0.281	0.0118	6.9649	0.0398	4.9207	0.0252	0.0091	0.006	0.0062	0.0037	0.2629	0.0097	10.7812	0.0494	< LOD	0.0062	0.0219	0.0034	0.0079	0.0016	0.0087	0.0012	< LOD	0.0005	< LOD	0.0006	0.0022	0.0007
6054	2018-01-10 10:46:00	NAM-MS2	sample	GeoChem	GeoChem Trace	DualSoil	DualSoil	121	Passed	7.1306	1.3604	3.3305	0.2406	34.7003	0.4023	0.1562	0.0447	< LOD	0.0164	0.6842	0.0174	0.1977	0.0111	6.9757	0.0394	4.3688	0.0236	0.0067	0.0056	0.0071	0.0036	0.2561	0.0096	10.9107	0.0495	< LOD	0.0062	0.0188	0.0032	0.0062	0.0015	0.0116	0.0013	< LOD	0.0005	< LOD	0.0006	0.0019	0.0007
6055	2018-01-10 10:49:00	NAM-MS42	sample	GeoChem	GeoChem Trace	DualSoil	DualSoil	120	Passed	2.8269	1.132	4.9772	0.2729	26.0666	0.3517	0.3071	0.046	0.0328	0.0209	0.7935	0.0167	0.1744	0.0109	1.9101	0.0229	4.2811	0.0236	< LOD	0.006	< LOD	0.0039	0.6005	0.0136	17.8976	0.0599	< LOD	0.0105	0.0214	0.0046	0.0069	0.0018	0.0142	0.0017	< LOD	0.0006	< LOD	0.0007	0.0032	0.0009
6056	2018-01-10 10:51:00	NAM-MS42	sample	GeoChem	GeoChem Trace	DualSoil	DualSoil	120	Passed	2.5631	1.1551	4.8166	0.2751	21.3034	0.3212	0.2755	0.0482	< LOD	0.0223	0.8327	0.0158	0.1013	0.0104	1.9327	0.0233	4.7182	0.0253	< LOD	0.0067	< LOD	0.0044	0.6602	0.0142	19.3843	0.0626	< LOD	0.012	0.0267	0.0049	0.0076	0.0019	0.0166	0.0018	< LOD	0.0006	< LOD	0.0007	0.0031	0.0009
6057	2018-01-10 10:54:00	NAM-MS42	sample	GeoChem	GeoChem Trace	DualSoil	DualSoil	120	Passed	2.0772	1.0499	4.3444	0.2591	33.6053	0.3982	0.1512	0.0403	< LOD	0.0204	0.7731	0.0172	0.1941	0.011	1.397	0.0199	3.3782	0.0204	< LOD	0.005	< LOD	0.0035	0.6377	0.014	15.8541	0.0554	< LOD	0.0085	0.0179	0.0038	0.0046	0.0015	0.014	0.0015	< LOD	0.0005	< LOD	0.0007	0.0034	0.0008
6058	2018-01-10 10:57:00	NAM-MS42	sample	GeoChem	GeoChem Trace	DualSoil	DualSoil	122	Passed	2.7944	1.0421	5.2485	0.2649	32.9482	0.3858	0.3178	0.0391	0.0672	0.0188	0.8439	0.0174	0.2028	0.0103	2.0702	0.0227	3.0445	0.0191	0.0052	0.0047	< LOD	0.0035	0.6645	0.0143	15.4121	0.0549	< LOD	0.0082	0.0157	0.0036	0.004	0.0014	0.0119	0.0014	< LOD	0.0005	< LOD	0.0006	0.0031	0.0008
6059	2018-01-10 11:00:00	NAM-MS42	sample	GeoChem	GeoChem Trace	DualSoil	DualSoil	120	Passed	2.9704	1.2614	4.9969	0.28	21.1518	0.3207	0.236	0.0488	0.0396	0.0225	0.878	0.0164	0.1206	0.0105	1.9231	0.0233	4.8572	0.0257	0.0115	0.0068	< LOD	0.0044	0.6933	0.0147	19.6303	0.0632	< LOD	0.0122	0.0247	0.0055	0.0074	0.0021	0.0161	0.0019	< LOD	0.0006	< LOD	0.0008	0.0028	0.001
6060	2018-01-10 11:06:00	NAM-MS32	sample	GeoChem	GeoChem Trace	DualSoil	DualSoil	120	Passed	2.9736	1.1916	5.4928	0.2972	20.0287	0.3168	< LOD	0.0435	< LOD	0.0222	0.9007	0.0179	0.2016	0.0119	1.4414	0.0211	5.1419	0.0268	0.0072	0.0071	< LOD	0.0051	0.736	0.0149	23.4208	0.0689	0.0608	0.0136	0.0352	0.0065	0.0116	0.0025	0.0179	0.0021	< LOD	0.0007	< LOD	0.0009	0.0043	0.0011
6061	2018-01-10 11:08:00	NAM-MS32	sample	GeoChem	GeoChem Trace	DualSoil	DualSoil	121	Passed	2.4618	1.1331	6.3519	0.3065	22.4043	0.3295	< LOD	0.0405	< LOD	0.0207	0.8782	0.0174	0.2516	0.012	1.7429	0.0223	4.0564	0.0234	0.0135	0.0063	< LOD	0.0048	0.7137	0.0148	22.0353	0.0663	0.0169	0.0125	0.0327	0.0058	0.0091	0.0022	0.0171	0.0019	< LOD	0.0006	< LOD	0.0008	0.0041	0.0011
6062	2018-01-10 11:11:00	NAM-MS32	sample	GeoChem	GeoChem Trace	DualSoil	DualSoil	120	Passed	2.3606	1.1636	6.4025	0.3077	25.0215	0.3493	< LOD	0.0415	< LOD	0.0207	0.7681	0.0174	0.1886	0.0114	1.704	0.0221	3.7853	0.0225	< LOD	0.006	< LOD	0.0046	0.726	0.0149	21.0105	0.0645	0.0121	0.0116	0.0242	0.0052	0.0078	0.0021	0.0207	0.002	< LOD	0.0006	< LOD	0.0008	0.004	0.001
6063	2018-01-10 11:13:00	NAM-MS32	sample	GeoChem	GeoChem Trace	DualSoil	DualSoil	120	Passed	2.4659	1.1922	5.4355	0.2964	18.8318	0.3072	< LOD	0.0462	< LOD	0.0222	0.8379	0.0178	0.2204	0.0121	1.6415	0.0223	5.5825	0.028	0.0128	0.0074	< LOD	0.005	0.7132	0.0148	23.5541	0.0697	0.0558	0.0138	0.0337	0.0064	0.0109	0.0025	0.0205	0.0022	< LOD	0.0007	< LOD	0.0009	0.0043	0.0012
6064	2018-01-10 11:16:00	NAM-MS32	sample	GeoChem	GeoChem Trace	DualSoil	DualSoil	120	Passed	2.8072	1.2689	5.1352	0.2906	19.547	0.3123	< LOD	0.0455	< LOD	0.0219	0.8512	0.0177	0.1616	0.0112	1.6939	0.0225	4.8951	0.0264	0.0114	0.0069	< LOD	0.0051	0.6747	0.0145	23.9967	0.0699	0.0488	0.0139	0.0339	0.007	0.0094	0.0027	0.0222	0.0024	< LOD	0.0008	< LOD	0.001	0.0048	0.0012
6065	2018-01-10 11:19:00	NAM-MS22	sample	GeoChem	GeoChem Trace	DualSoil	DualSoil	120	Passed	2.08	0.9169	6.2925	0.2748	46.1219	0.4596	0.5333	0.0376	0.0907	0.016	0.8344	0.0176	0.5355	0.0133	2.8073	0.0253	0.8521	0.01	0.0058	0.0026	< LOD	0.0024	0.6896	0.0146	8.9833	0.0412	< LOD	0.0041	0.0058	0.0022	0.0038	0.0009	0.0093	0.001	< LOD	0.0004	< LOD	0.0005	0.0036	0.0006
6066	2018-01-10 11:21:00	NAM-MS22	sample	GeoChem	GeoChem Trace	DualSoil	DualSoil	120	Passed	2.0447	0.9539	5.831	0.2684	46.0074	0.4586	0.4207	0.0364	0.0474	0.0159	0.929	0.0183	0.4553	0.0126	2.9127	0.0258	1.0419	0.0109	0.0041	0.0028	< LOD	0.0024	0.6387	0.014	8.713	0.0407	< LOD	0.0041	0.0045	0.0021	0.0037	0.0009	0.0106	0.001	0.0005	0.0004	< LOD	0.0004	0.0034	0.0006
6067	2018-01-10 11:24:00	NAM-MS22	sample	GeoChem	GeoChem Trace	DualSoil	DualSoil	120	Passed	1.6401	0.8802	6.2291	0.2713	50.2518	0.4779	0.3515	0.0334	0.0492	0.0146	0.7254	0.0174	0.9004	0.016	2.8677	0.0252	0.6218	0.0084	0.0057	0.0023	< LOD	0.0022	0.5026	0.0127	7.262	0.037	< LOD	0.0031	0.0035	0.002	0.0038	0.0009	0.0092	0.001	< LOD	0.0004	< LOD	0.0004	0.006	0.0006
6068	2018-01-10 11:27:00	NAM-MS22	sample	GeoChem	GeoChem Trace	DualSoil	DualSoil	121	Passed	1.6132	0.9292	6.3578	0.2738	50.5161	0.4768	0.3632	0.0339	0.0394	0.0149	0.7616	0.0179	0.6721	0.0144	2.9611	0.0256	0.6333	0.0086	< LOD	0.0023	< LOD	0.0022	0.5467	0.0131	7.4165	0.0374	< LOD	0.0031	0.004	0.002	0.0036	0.0009	0.0094	0.001	< LOD	0.0004	< LOD	0.0004	0.0049	0.0006
6069	2018-01-10 11:29:00	NAM-MS22	sample	GeoChem	GeoChem Trace	DualSoil	DualSoil	120	Passed	1.3826	0.87	5.6953	0.2607	50.1631	0.4767	0.1323	0.0274	0.07	0.015	0.8428	0.0177	0.6238	0.0139	2.5458	0.024	0.8607	0.0098	< LOD	0.0024	< LOD	0.0023	0.5097	0.0126	7.2616	0.037	< LOD	0.0032	0.0038	0.0018	0.0033	0.0008	0.0094	0.0009	< LOD	0.0004	< LOD	0.0004	0.0033	0.0005
6070	2018-01-10 11:40:00	AMIS0454	CRM	GeoChem	GeoChem Trace	DualSoil	DualSoil	120	Passed	2.2033	1.2066	1.9746	0.246	2.9342	0.1543	< LOD	0.0358	< LOD	0.0222	< LOD	0.0165	0.0552	0.0126	0.1868	0.015	37.3066	0.0815	< LOD	0.0202	< LOD	0.0063	0.4165	0.011	27.5602	0.0932	0.3349	0.0158	0.0429	0.008	0.0097	0.0023	0.0381	0.0029	< LOD	0.0006	< LOD	0.0011	0.0032	0.0013
6071	2018-01-10 11:43:00	AMIS0454	CRM	GeoChem	GeoChem Trace	DualSoil	DualSoil	120	Passed	2.2349	1.2513	2.002	0.2488	2.8592	0.1518	< LOD	0.0355	< LOD	0.0221	< LOD	0.0163	0.0634	0.0126	0.1755	0.0149	37.2865	0.0814	< LOD	0.0202	< LOD	0.0062	0.4151	0.011	27.4886	0.0931	0.3361	0.0158	0.0474	0.0083	0.0128	0.0025	0.0401	0.003	< LOD	0.0006	< LOD	0.0012	0.0028	0.0013
6072	2018-01-10 11:46:00	AMIS0454	CRM	GeoChem	GeoChem Trace	DualSoil	DualSoil	120	Passed	1.6054	1.2666	1.9109	0.2515	2.8216	0.1527	< LOD	0.0357	< LOD	0.0223	< LOD	0.0163	0.0565	0.0128	0.1703	0.015	37.3595	0.0816	< LOD	0.0202	< LOD	0.0063	0.4175	0.0111	27.6468	0.0934	0.3427	0.0159	0.0391	0.0077	0.0103	0.0023	0.0394	0.0029	< LOD	0.0006	< LOD	0.0011	0.0028	0.0012
6073	2018-01-10 11:48:00	AMIS0454	CRM	GeoChem	GeoChem Trace	DualSoil	DualSoil	120	Passed	1.2584	1.2007	1.9984	0.2485	2.9505	0.1541	< LOD	0.0359	< LOD	0.0222	< LOD	0.0162	0.0639	0.0127	0.1816	0.015	37.2999	0.0815	< LOD	0.0202	< LOD	0.0063	0.4158	0.011	27.5805	0.0932	0.337	0.0159	0.0398	0.0076	0.0105	0.0022	0.0365	0.0028	< LOD	0.0006	< LOD	0.0011	0.0024	0.0012
6074	2018-01-10 11:51:00	AMIS0454	CRM	GeoChem	GeoChem Trace	DualSoil	DualSoil	121	Passed	1.6224	1.2659	1.8794	0.2484	2.9126	0.1529	< LOD	0.0353	< LOD	0.0223	< LOD	0.016	0.0614	0.0126	0.1799	0.0149	37.2846	0.0808	< LOD	0.02	< LOD	0.0062	0.4233	0.0111	27.6021	0.0933	0.3394	0.0159	0.0406	0.0078	0.0093	0.0023	0.0374	0.0029	< LOD	0.0006	< LOD	0.0011	0.0034	0.0012
6075	2018-01-10 11:54:00	NAM-MS21a	cal sample	GeoChem	GeoChem Trace	DualSoil	DualSoil	120	Passed	2.009	0.9148	5.7649	0.2599	47.618	0.4621	0.2954	0.0301	0.1385	0.0165	1.1215	0.0191	0.3454	0.0111	2.2425	0.0225	0.4631	0.0075	0.006	0.0022	0.0199	0.0024	0.4974	0.0124	7.6917	0.0376	< LOD	0.0036	0.0048	0.002	0.0041	0.0009	0.011	0.001	< LOD	0.0004	< LOD	0.0005	0.0026	0.0006
6076	2018-01-10 11:57:00	NAM-MS21a	cal sample	GeoChem	GeoChem Trace	DualSoil	DualSoil	120	Passed	2.0953	0.9086	6.7534	0.2766	46.6582	0.4573	0.1466	0.027	0.1696	0.0175	1.0902	0.0197	0.2502	0.0102	2.4649	0.0236	0.5105	0.0079	0.0058	0.0023	0.0214	0.0025	0.5218	0.0127	8.1998	0.039	< LOD	0.0038	0.0043	0.0021	0.0038	0.0009	0.0185	0.0013	< LOD	0.0004	< LOD	0.0005	0.0025	0.0006
6077	2018-01-10 11:59:00	NAM-MS21a	cal sample	GeoChem	GeoChem Trace	DualSoil	DualSoil	120	Passed	1.8143	0.8916	6.0779	0.2644	50.162	0.4753	0.3814	0.0315	0.1383	0.0162	1.0544	0.0193	0.4747	0.0123	2.0491	0.0215	0.3401	0.0065	0.0053	0.002	0.0172	0.0023	0.4832	0.0122	7.2829	0.0365	< LOD	0.0032	0.004	0.002	0.004	0.0009	0.0091	0.001	< LOD	0.0004	< LOD	0.0005	0.0039	0.0006
6078	2018-01-10 12:02:00	NAM-MS21a	cal sample	GeoChem	GeoChem Trace	DualSoil	DualSoil	120	Passed	1.9699	0.9015	6.5168	0.2726	47.1651	0.46	0.2717	0.0309	0.1535	0.0169	1.0683	0.0184	0.33	0.0109	2.2647	0.0226	0.4217	0.0072	0.0021	0.0021	0.0144	0.0023	0.6014	0.0135	8.0026	0.0384	< LOD	0.0037	0.0048	0.0021	0.0035	0.0009	0.0142	0.0012	< LOD	0.0004	< LOD	0.0005	0.0025	0.0006
6079	2018-01-10 12:04:00	NAM-MS21a	cal sample	GeoChem	GeoChem Trace	DualSoil	DualSoil	120	Passed	2.1391	0.8937	6.7358	0.2782	46.1747	0.4559	0.1672	0.0289	0.1843	0.0176	1.1294	0.0193	0.2516	0.0102	2.463	0.0236	0.7455	0.0093	0.0063	0.0025	0.021	0.0026	0.575	0.0133	8.7711	0.0405	< LOD	0.004	0.0062	0.0023	0.0044	0.001	0.0186	0.0014	< LOD	0.0005	< LOD	0.0005	0.0024	0.0006
6080	2018-01-10 12:07:00	NAM-MS26a	cal sample	GeoChem	GeoChem Trace	DualSoil	DualSoil	121	Passed	1.6715	1.1912	8.2013	0.3287	25.5948	0.3475	0.1119	0.0382	< LOD	0.0202	0.6744	0.0156	0.0887	0.0098	2.0952	0.0236	2.804	0.0189	< LOD	0.0052	< LOD	0.0038	1.0517	0.0177	18.1171	0.0592	< LOD	0.0105	0.0155	0.0043	0.0069	0.0018	0.0205	0.0019	< LOD	0.0005	< LOD	0.0007	0.0025	0.0009
6081	2018-01-10 12:10:00	NAM-MS26a	cal sample	GeoChem	GeoChem Trace	DualSoil	DualSoil	120	Passed	2.2526	1.2291	8.0272	0.3338	20.8205	0.3194	< LOD	0.0433	< LOD	0.0215	0.6061	0.0163	0.0507	0.0097	2.0732	0.0241	3.6157	0.0221	< LOD	0.0062	< LOD	0.0042	0.9625	0.0169	19.9987	0.0629	< LOD	0.0121	0.0245	0.0052	0.008	0.0021	0.034	0.0024	< LOD	0.0006	< LOD	0.0008	0.0023	0.001
6082	2018-01-10 12:12:00	NAM-MS26a	cal sample	GeoChem	GeoChem Trace	DualSoil	DualSoil	120	Passed	2.3243	1.1354	8.4636	0.3317	30.4053	0.3808	0.0737	0.0351	< LOD	0.0188	0.5908	0.0176	0.1215	0.01	2.4517	0.0252	2.1039	0.0163	< LOD	0.0045	< LOD	0.0038	1.0461	0.0177	17.392	0.0579	< LOD	0.0091	0.0144	0.004	0.0056	0.0016	0.0227	0.0019	< LOD	0.0005	< LOD	0.0007	0.0023	0.0008
6083	2018-01-10 12:15:00	NAM-MS26a	cal sample	GeoChem	GeoChem Trace	DualSoil	DualSoil	120	Passed	2.2309	1.1814	7.9737	0.3349	23.4331	0.3388	0.1032	0.044	< LOD	0.0213	0.7107	0.0165	0.0584	0.0095	2.1899	0.0245	3.3706	0.0212	< LOD	0.0059	< LOD	0.0043	0.9205	0.0166	19.7808	0.0625	< LOD	0.0114	0.024	0.005	0.0067	0.002	0.0308	0.0023	< LOD	0.0006	< LOD	0.0008	0.0023	0.0009
6084	2018-01-10 12:17:00	NAM-MS26a	cal sample	GeoChem	GeoChem Trace	DualSoil	DualSoil	120	Passed	2.4774	1.2204	7.8032	0.3328	20.848	0.3205	< LOD	0.0432	< LOD	0.0215	0.6125	0.016	0.0611	0.0097	2.1277	0.0243	4.1731	0.0237	< LOD	0.0066	< LOD	0.0045	0.9135	0.0166	20.3081	0.0638	< LOD	0.0121	0.0288	0.0058	0.0092	0.0023	0.0414	0.0027	< LOD	0.0006	< LOD	0.0008	0.0025	0.001
6085	2018-01-10 12:20:00	NAM-MS23	sample	GeoChem	GeoChem Trace	DualSoil	DualSoil	120	Passed	2.6323	1.0739	7.8966	0.3163	27.1161	0.3554	0.0839	0.0356	< LOD	0.0192	0.8638	0.0162	0.1593	0.0103	2.7021	0.026	1.7529	0.0151	< LOD	0.0044	< LOD	0.0034	1.0105	0.0173	15.4621	0.0544	< LOD	0.0093	0.0186	0.004	0.0064	0.0015	0.0232	0.0018	< LOD	0.0006	< LOD	0.0006	0.0024	0.0008
6086	2018-01-10 12:23:00	NAM-MS23	sample	GeoChem	GeoChem Trace	DualSoil	DualSoil	120	Passed	2.6209	1.0503	8.1167	0.3213	25.2402	0.3443	0.0382	0.0358	< LOD	0.0197	0.7708	0.0157	0.0937	0.0094	2.3671	0.0246	2.0548	0.0163	< LOD	0.0046	< LOD	0.0036	0.9915	0.0171	16.3288	0.0559	< LOD	0.01	0.0164	0.0039	0.0056	0.0015	0.0228	0.0018	< LOD	0.0005	< LOD	0.0006	0.0021	0.0008
6087	2018-01-10 12:26:00	NAM-MS23	sample	GeoChem	GeoChem Trace	DualSoil	DualSoil	120	Passed	2.7652	1.1432	7.8814	0.3159	28.728	0.3658	0.1478	0.0366	0.0408	0.0191	0.9253	0.0167	0.1737	0.0102	2.7767	0.0262	1.6248	0.0144	0.0105	0.0042	< LOD	0.0033	0.9796	0.0171	15.3756	0.0543	< LOD	0.0089	0.0202	0.0039	0.0055	0.0015	0.0258	0.0019	< LOD	0.0006	< LOD	0.0006	0.0018	0.0008
6088	2018-01-10 12:28:00	NAM-MS23	sample	GeoChem	GeoChem Trace	DualSoil	DualSoil	120	Passed	3.0193	1.1297	8.1454	0.3184	30.4947	0.3771	0.4262	0.0397	0.0516	0.0183	1.0476	0.0182	0.1524	0.0097	2.8409	0.0263	1.4482	0.0136	0.0081	0.0039	< LOD	0.0032	0.9269	0.0167	15.206	0.0539	< LOD	0.0085	0.0142	0.0037	0.0044	0.0014	0.0282	0.0019	0.0007	0.0006	< LOD	0.0006	0.0021	0.0008
6089	2018-01-10 12:30:00	NAM-MS23	sample	GeoChem	GeoChem Trace	DualSoil	DualSoil	120	Passed	2.1917	1.1429	8.6415	0.3261	25.9129	0.3468	0.1469	0.0349	0.0524	0.019	0.843	0.0159	0.1555	0.0096	2.671	0.0257	1.6102	0.0144	< LOD	0.0042	< LOD	0.0035	1.0138	0.0173	16.1344	0.0555	< LOD	0.0097	0.0184	0.004	0.0054	0.0016	0.0321	0.0021	< LOD	0.0005	< LOD	0.0007	0.0027	0.0008
6090	2018-01-10 12:44:00	NAM-MS28	sample	GeoChem	GeoChem Trace	DualSoil	DualSoil	120	Passed	1.7801	0.8131	4.9551	0.2463	57.1675	0.5108	0.2789	0.0302	0.0153	0.0135	0.4155	0.0158	0.9777	0.0164	1.9092	0.0208	0.6062	0.0081	0.0035	0.002	0.005	0.002	0.3051	0.0099	5.1642	0.0309	< LOD	0.0019	< LOD	0.0016	0.0032	0.0007	0.0048	0.0007	< LOD	0.0004	< LOD	0.0004	0.0045	0.0005
6091	2018-01-10 12:46:00	NAM-MS28	sample	GeoChem	GeoChem Trace	DualSoil	DualSoil	120	Passed	1.6173	0.7577	4.3222	0.2276	62.9892	0.5357	0.143	0.023	0.024	0.0118	0.4503	0.0159	0.857	0.0152	1.5619	0.0188	0.4266	0.0068	< LOD	0.0016	0.0047	0.0018	0.1754	0.0077	3.2707	0.0244	< LOD	0.0009	< LOD	0.0014	0.0029	0.0006	0.0043	0.0006	< LOD	0.0004	< LOD	0.0004	0.0048	0.0005
6092	2018-01-10 12:49:00	NAM-MS28	sample	GeoChem	GeoChem Trace	DualSoil	DualSoil	120	Passed	2.0514	0.8467	5.0422	0.2479	56.3169	0.507	0.2831	0.0303	< LOD	0.0131	0.4081	0.0155	0.6466	0.0138	1.974	0.0211	0.7671	0.009	0.0045	0.0021	0.005	0.002	0.3217	0.0102	5.6267	0.0323	< LOD	0.002	0.0017	0.0016	0.0034	0.0007	0.0055	0.0007	< LOD	0.0004	< LOD	0.0004	0.0043	0.0005
6093	2018-01-10 12:52:00	NAM-MS28	sample	GeoChem	GeoChem Trace	DualSoil	DualSoil	120	Passed	1.6996	0.9113	5.5472	0.2586	52.6908	0.4898	0.3173	0.0316	< LOD	0.0137	0.3843	0.0159	0.826	0.0154	2.2129	0.0224	0.9175	0.0099	0.0038	0.0024	0.0072	0.0023	0.3463	0.0106	6.4904	0.0348	< LOD	0.0026	0.0022	0.0017	0.0037	0.0008	0.0063	0.0008	< LOD	0.0004	< LOD	0.0004	0.0043	0.0005
6094	2018-01-10 12:54:00	NAM-MS28	sample	GeoChem	GeoChem Trace	DualSoil	DualSoil	120	Passed	1.6227	0.8019	4.1924	0.2301	59.9858	0.5243	0.2187	0.0278	0.0366	0.0131	0.4319	0.0156	0.8868	0.0156	1.8352	0.0204	0.6556	0.0083	< LOD	0.0019	< LOD	0.0019	0.2305	0.0087	4.7851	0.0297	< LOD	0.0015	< LOD	0.0016	0.0036	0.0007	0.0051	0.0007	0.0004	0.0004	< LOD	0.0004	0.0044	0.0005
6095	2018-01-10 12:57:00	NAM-MS20	sample	GeoChem	GeoChem Trace	DualSoil	DualSoil	120	Passed	2.6239	1.1476	7.6924	0.3157	29.1012	0.3704	0.1677	0.0384	< LOD	0.0199	1.2895	0.0192	0.1604	0.0108	2.675	0.0261	2.3625	0.0173	0.0099	0.0048	< LOD	0.0035	0.8271	0.0158	15.5775	0.055	< LOD	0.0088	0.0148	0.0035	0.0048	0.0014	0.0246	0.0018	< LOD	0.0005	< LOD	0.0006	0.0027	0.0008
6096	2018-01-10 13:00:00	NAM-MS20	sample	GeoChem	GeoChem Trace	DualSoil	DualSoil	120	Passed	2.3389	1.2208	7.459	0.323	24.0019	0.3413	0.0577	0.0429	< LOD	0.0215	1.2297	0.0186	0.0726	0.0098	2.5709	0.0261	3.3871	0.0212	< LOD	0.0058	< LOD	0.0041	0.9225	0.0166	18.2375	0.0602	< LOD	0.0108	0.0199	0.0045	0.0063	0.0018	0.0237	0.002	< LOD	0.0006	< LOD	0.0007	0.0013	0.0009
6097	2018-01-10 13:02:00	NAM-MS20	sample	GeoChem	GeoChem Trace	DualSoil	DualSoil	120	Passed	2.5061	1.0584	8.2242	0.318	33.8536	0.3968	0.2282	0.0371	0.0495	0.0183	1.1379	0.019	0.2279	0.0107	2.9073	0.0265	1.9193	0.0153	0.0052	0.0041	< LOD	0.0032	0.7668	0.0152	13.9331	0.0519	< LOD	0.0073	0.0105	0.0031	0.0048	0.0013	0.0263	0.0018	< LOD	0.0005	< LOD	0.0006	0.0026	0.0007
6098	2018-01-10 13:05:00	NAM-MS20	sample	GeoChem	GeoChem Trace	DualSoil	DualSoil	120	Passed	2.4622	1.1178	7.8139	0.3176	31.5305	0.385	0.0979	0.0375	< LOD	0.0194	1.3032	0.0198	0.1645	0.0108	2.7182	0.0262	2.2563	0.0168	0.0101	0.0047	< LOD	0.0036	0.7952	0.0155	15.0514	0.054	< LOD	0.0082	0.0139	0.0034	0.0047	0.0014	0.0343	0.002	< LOD	0.0005	< LOD	0.0006	0.0024	0.0007
6099	2018-01-10 13:07:00	NAM-MS20	sample	GeoChem	GeoChem Trace	DualSoil	DualSoil	120	Passed	2.795	1.2965	7.3387	0.323	21.5713	0.325	< LOD	0.0443	< LOD	0.0223	1.1075	0.0179	0.0947	0.0103	2.4355	0.0257	3.9382	0.023	< LOD	0.0063	< LOD	0.0043	0.9046	0.0165	19.3132	0.0623	< LOD	0.0117	0.0199	0.0048	0.006	0.0019	0.0238	0.002	< LOD	0.0006	< LOD	0.0008	0.0021	0.0009
6100	2018-01-10 13:10:00	NAM-MS36	sample	GeoChem	GeoChem Trace	DualSoil	DualSoil	120	Passed	3.1311	1.082	6.3052	0.2829	38.0574	0.4196	0.4379	0.0438	0.0423	0.018	0.9054	0.018	0.2018	0.0108	3.8081	0.0298	2.584	0.0174	< LOD	0.0044	< LOD	0.003	0.7231	0.015	10.3189	0.0456	< LOD	0.0056	0.0124	0.0027	0.0044	0.0012	0.0217	0.0015	< LOD	0.0005	< LOD	0.0005	0.0024	0.0006
6101	2018-01-10 13:13:00	NAM-MS36	sample	GeoChem	GeoChem Trace	DualSoil	DualSoil	120	Passed	1.9809	0.9461	6.7832	0.283	43.599	0.4452	0.3615	0.0374	0.0882	0.0165	1.0399	0.0186	0.2936	0.011	3.5816	0.0284	1.8218	0.0142	< LOD	0.0035	0.0048	0.0026	0.5845	0.0135	8.2987	0.0404	< LOD	0.0042	0.0059	0.0021	0.004	0.001	0.0182	0.0013	< LOD	0.0004	< LOD	0.0005	0.0026	0.0006
6102	2018-01-10 13:16:00	NAM-MS36	sample	GeoChem	GeoChem Trace	DualSoil	DualSoil	120	Passed	2.8187	1.1034	5.7884	0.2772	37.9731	0.4198	0.3626	0.0431	0.0312	0.0179	0.7285	0.0168	0.2397	0.0113	3.9493	0.0304	3.1471	0.0193	< LOD	0.0047	< LOD	0.0032	0.6851	0.0147	10.5782	0.0465	< LOD	0.0058	0.0113	0.0028	0.0041	0.0012	0.0187	0.0014	< LOD	0.0005	< LOD	0.0005	0.0022	0.0007
6103	2018-01-10 13:18:00	NAM-MS36	sample	GeoChem	GeoChem Trace	DualSoil	DualSoil	120	Passed	3.1745	1.1855	6.5718	0.2928	31.9543	0.386	0.4237	0.0479	0.0197	0.0191	0.7739	0.0165	0.2039	0.011	4.1297	0.0313	3.4404	0.0205	< LOD	0.0053	< LOD	0.0033	0.7505	0.0154	11.5832	0.049	< LOD	0.007	0.0131	0.0032	0.0035	0.0014	0.0226	0.0016	< LOD	0.0005	< LOD	0.0005	0.0016	0.0007
6104	2018-01-10 13:21:00	NAM-MS36	sample	GeoChem	GeoChem Trace	DualSoil	DualSoil	120	Passed	2.893	1.0162	5.7359	0.272	46.3498	0.4623	0.4889	0.0421	0.0635	0.0169	0.997	0.0192	0.3725	0.0122	3.8255	0.0293	1.6408	0.0136	< LOD	0.0033	0.0043	0.0027	0.5271	0.0129	8.0475	0.0399	< LOD	0.0038	0.0064	0.0022	0.0035	0.001	0.0177	0.0013	< LOD	0.0004	< LOD	0.0005	0.0026	0.0006
6105	2018-01-10 13:25:00	Granite AC-E	CRM	GeoChem	GeoChem Trace	DualSoil	DualSoil	120	Passed	< LOD	0.7251	13.7534	0.3638	68.7355	0.5699	< LOD	0.0229	< LOD	0.011	< LOD	0.0152	4.2496	0.0312	0.4356	0.0121	0.0461	0.0031	< LOD	0.0012	0.0063	0.0016	0.0413	0.0045	1.5725	0.0169	0	0	< LOD	0.0012	0.002	0.0007	0.0205	0.0011	< LOD	0.0004	< LOD	0.0004	0.0149	0.0006
6106	2018-01-10 13:27:00	Granite AC-E	CRM	GeoChem	GeoChem Trace	DualSoil	DualSoil	120	Passed	< LOD	0.7235	14.0978	0.3678	69.1132	0.5719	< LOD	0.0231	< LOD	0.011	< LOD	0.0153	4.2414	0.0312	0.4266	0.012	0.045	0.003	< LOD	0.0012	0.0073	0.0016	0.0441	0.0046	1.578	0.0169	0	0	< LOD	0.0012	0.0026	0.0007	0.0203	0.0011	< LOD	0.0004	< LOD	0.0004	0.0147	0.0006
6107	2018-01-10 13:30:00	Granite AC-E	CRM	GeoChem	GeoChem Trace	DualSoil	DualSoil	120	Passed	< LOD	0.7121	13.9916	0.3661	69.1035	0.5719	< LOD	0.0232	< LOD	0.0109	< LOD	0.0152	4.2667	0.0312	0.4407	0.0121	0.0461	0.003	0.0015	0.0012	0.007	0.0016	0.0455	0.0046	1.5797	0.0169	0	0	< LOD	0.0012	0.0022	0.0007	0.0205	0.0011	0.0007	0.0005	< LOD	0.0004	0.0146	0.0006
6108	2018-01-10 13:32:00	Granite AC-E	CRM	GeoChem	GeoChem Trace	DualSoil	DualSoil	120	Passed	< LOD	0.7356	13.8493	0.3649	68.8113	0.5702	< LOD	0.0232	< LOD	0.0111	< LOD	0.0152	4.2498	0.0312	0.445	0.0121	0.046	0.0031	< LOD	0.0012	0.0059	0.0016	0.0423	0.0046	1.5738	0.0169	0	0	< LOD	0.0012	0.0022	0.0007	0.021	0.0011	0.0005	0.0004	< LOD	0.0004	0.0147	0.0006
6109	2018-01-10 13:35:00	Granite AC-E	CRM	GeoChem	GeoChem Trace	DualSoil	DualSoil	120	Passed	< LOD	0.7151	14.0374	0.3668	69.0434	0.5714	< LOD	0.0229	< LOD	0.0109	< LOD	0.0154	4.2346	0.0311	0.4558	0.0122	0.0447	0.003	0.0014	0.0012	0.0062	0.0016	0.0432	0.0046	1.5926	0.017	0	0	< LOD	0.0012	0.0013	0.0007	0.0204	0.0011	< LOD	0.0004	< LOD	0.0004	0.0147	0.0006
6110	2018-01-10 13:38:00	NAM-MS34b	cal sample	GeoChem	GeoChem Trace	DualSoil	DualSoil	120	Passed	1.3646	0.8301	5.0057	0.2423	59.8955	0.5185	0.3404	0.03	0.202	0.0159	1.3649	0.0211	1.5167	0.0194	1.7342	0.0196	0.3665	0.0063	< LOD	0.0016	0.006	0.0016	0.1325	0.0069	2.2306	0.0203	< LOD	0.001	< LOD	0.0013	0.0026	0.0006	0.0039	0.0006	< LOD	0.0004	< LOD	0.0003	0.0068	0.0005
6111	2018-01-10 13:41:00	NAM-MS34b	cal sample	GeoChem	GeoChem Trace	DualSoil	DualSoil	121	Passed	1.8001	0.8118	4.1122	0.2256	60.4194	0.5179	0.3637	0.0308	0.2002	0.0157	1.17	0.0201	1.1649	0.0172	2.1478	0.0214	0.4522	0.0069	< LOD	0.0017	< LOD	0.0017	0.1616	0.0075	2.5132	0.0217	< LOD	0.001	< LOD	0.0013	0.0025	0.0006	0.0047	0.0006	< LOD	0.0004	< LOD	0.0004	0.0063	0.0005
6112	2018-01-10 13:43:00	NAM-MS34b	cal sample	GeoChem	GeoChem Trace	DualSoil	DualSoil	121	Passed	1.2435	0.8346	4.6619	0.2352	60.1461	0.5152	0.2657	0.0283	0.1918	0.0158	1.4302	0.0214	1.527	0.0193	1.8116	0.0199	0.3856	0.0064	< LOD	0.0016	0.0092	0.0018	0.1252	0.0067	2.0987	0.0197	< LOD	0.001	< LOD	0.0013	0.0028	0.0006	0.0041	0.0006	< LOD	0.0004	< LOD	0.0003	0.0075	0.0005
6113	2018-01-10 13:46:00	NAM-MS34b	cal sample	GeoChem	GeoChem Trace	DualSoil	DualSoil	120	Passed	0.9873	0.825	5.8989	0.2585	58.844	0.514	0.2787	0.0297	0.1742	0.0161	1.2421	0.0205	1.922	0.0217	1.7663	0.02	0.3737	0.0064	0.0041	0.0018	< LOD	0.0017	0.1622	0.0075	2.3976	0.0211	< LOD	0.0011	< LOD	0.0013	0.0028	0.0006	0.0043	0.0006	< LOD	0.0004	< LOD	0.0003	0.0071	0.0005
6114	2018-01-10 13:49:00	NAM-MS34b	cal sample	GeoChem	GeoChem Trace	DualSoil	DualSoil	120	Passed	1.182	0.8374	5.381	0.2491	58.9842	0.5145	0.2926	0.0298	0.1844	0.0161	1.1663	0.0202	1.3312	0.0184	2.0141	0.021	0.4862	0.0071	< LOD	0.0018	0.0033	0.0018	0.1643	0.0075	2.4878	0.0215	< LOD	0.0011	< LOD	0.0013	0.003	0.0006	0.0053	0.0007	< LOD	0.0003	< LOD	0.0003	0.0064	0.0005
6115	2018-01-10 14:19:00	NAM-MS21b	cal sample	GeoChem	GeoChem Trace	DualSoil	DualSoil	120	Passed	1.7847	0.9112	6.2021	0.2707	46.3355	0.4569	0.4801	0.0355	0.1707	0.0172	0.8684	0.0173	0.4731	0.0125	2.6179	0.0243	0.5034	0.0079	< LOD	0.0022	0.0047	0.0023	0.6467	0.014	8.0697	0.0388	< LOD	0.0039	0.0049	0.0021	0.0035	0.0009	0.0124	0.0011	< LOD	0.0004	< LOD	0.0004	0.0038	0.0006
6116	2018-01-10 14:22:00	NAM-MS21b	cal sample	GeoChem	GeoChem Trace	DualSoil	DualSoil	120	Passed	2.0926	0.8903	6.9165	0.2806	45.1611	0.45	0.3138	0.0316	0.1806	0.0177	1.0722	0.0185	0.6431	0.014	2.2249	0.0226	0.4005	0.0072	0.007	0.0023	0.0069	0.0023	0.5932	0.0134	7.9822	0.0384	< LOD	0.004	0.0055	0.0021	0.0025	0.0009	0.016	0.0012	< LOD	0.0004	< LOD	0.0005	0.0052	0.0006
6117	2018-01-10 14:25:00	NAM-MS21b	cal sample	GeoChem	GeoChem Trace	DualSoil	DualSoil	120	Passed	1.7237	0.8946	5.9505	0.2654	48.176	0.4662	0.4437	0.0343	0.1709	0.0168	0.9094	0.0178	0.4365	0.012	2.4865	0.0236	0.4504	0.0074	0.0071	0.0021	0.005	0.0022	0.5782	0.0133	7.955	0.0384	< LOD	0.0036	0.0047	0.0021	0.0038	0.0009	0.0173	0.0013	< LOD	0.0004	< LOD	0.0004	0.0034	0.0006
6118	2018-01-10 14:28:00	NAM-MS21b	cal sample	GeoChem	GeoChem Trace	DualSoil	DualSoil	120	Passed	1.8915	0.9092	6.1202	0.266	48.8945	0.4689	0.3961	0.0328	0.163	0.017	1.0272	0.019	0.5435	0.013	2.2271	0.0224	0.3917	0.007	0.0084	0.0021	0.0028	0.0021	0.5617	0.0131	7.4994	0.0371	< LOD	0.0034	0.0066	0.0021	0.004	0.0009	0.0157	0.0012	< LOD	0.0005	< LOD	0.0005	0.0042	0.0006
6119	2018-01-10 14:30:00	NAM-MS21b	cal sample	GeoChem	GeoChem Trace	DualSoil	DualSoil	120	Passed	1.5753	0.8194	5.7135	0.257	51.7757	0.4821	0.1478	0.025	0.1603	0.0159	1.1922	0.0196	0.6357	0.0136	1.8651	0.0205	0.3806	0.0067	0.0037	0.0019	0.0092	0.0021	0.4627	0.0119	6.7495	0.0351	< LOD	0.0028	0.0033	0.0019	0.0035	0.0008	0.0129	0.0011	< LOD	0.0004	< LOD	0.0005	0.0037	0.0006
6120	2018-01-10 14:34:00	NAM-MS13	sample	GeoChem	GeoChem Trace	DualSoil	DualSoil	120	Passed	2.807	1.1225	5.9492	0.2979	25.9924	0.3548	< LOD	0.042	< LOD	0.0199	0.3483	0.0151	0.3176	0.0128	2.0327	0.0237	4.8311	0.0251	< LOD	0.0064	< LOD	0.0043	0.6732	0.0145	19.7606	0.0634	< LOD	0.0108	0.0292	0.0055	0.0082	0.0022	0.0229	0.0022	< LOD	0.0007	< LOD	0.0009	0.0034	0.0011
6121	2018-01-10 14:37:00	NAM-MS13	sample	GeoChem	GeoChem Trace	DualSoil	DualSoil	120	Passed	3.047	1.18	6.0605	0.3012	24.3263	0.3442	< LOD	0.0407	< LOD	0.0199	0.3168	0.0145	0.2918	0.0125	2.0283	0.0238	4.9549	0.0257	< LOD	0.0066	< LOD	0.0044	0.7209	0.0149	20.503	0.0646	0.0271	0.0115	0.0263	0.0055	0.0089	0.0022	0.0269	0.0023	< LOD	0.0007	< LOD	0.0008	0.0033	0.001
6122	2018-01-10 14:39:00	NAM-MS13	sample	GeoChem	GeoChem Trace	DualSoil	DualSoil	121	Passed	2.8246	1.117	5.7354	0.2811	31.2734	0.381	< LOD	0.0344	< LOD	0.0173	0.4469	0.0156	0.424	0.013	2.1048	0.0232	3.9126	0.0219	0.009	0.0054	< LOD	0.0037	0.6456	0.0141	17.0376	0.0582	< LOD	0.0089	0.0187	0.0041	0.0064	0.0016	0.0306	0.0021	< LOD	0.0006	< LOD	0.0007	0.0037	0.0009
6123	2018-01-10 14:42:00	NAM-MS13	sample	GeoChem	GeoChem Trace	DualSoil	DualSoil	120	Passed	2.4525	1.1213	6.2197	0.3027	27.9027	0.3668	< LOD	0.0418	< LOD	0.0192	0.363	0.0149	0.3749	0.0132	2.3298	0.025	4.3033	0.0236	< LOD	0.006	< LOD	0.0041	0.7011	0.0147	18.9491	0.0619	0.0144	0.0102	0.0251	0.0051	0.0068	0.002	0.0222	0.0021	< LOD	0.0007	< LOD	0.0008	0.0034	0.001
6124	2018-01-10 14:44:00	NAM-MS13	sample	GeoChem	GeoChem Trace	DualSoil	DualSoil	120	Passed	3.5041	1.1537	7.2306	0.3165	30.4265	0.3826	< LOD	0.0392	< LOD	0.0192	0.3662	0.0156	0.3072	0.0126	2.1953	0.0242	3.2563	0.0203	< LOD	0.0053	< LOD	0.004	0.8744	0.0163	18.021	0.0596	< LOD	0.0093	0.0215	0.0047	0.008	0.002	0.0242	0.0021	< LOD	0.0006	< LOD	0.0007	0.0037	0.001
6125	2018-01-10 14:47:00	NAM-MS46	sample	GeoChem	GeoChem Trace	DualSoil	DualSoil	120	Passed	3.6352	1.1161	6.839	0.3057	24.4839	0.3419	0.0591	0.044	< LOD	0.0189	0.7338	0.017	0.1166	0.0098	2.6586	0.0263	3.872	0.0225	0.0096	0.006	< LOD	0.0039	0.8648	0.0162	18.1503	0.0606	< LOD	0.0107	0.0255	0.0052	0.0071	0.0021	0.0262	0.0022	< LOD	0.0006	< LOD	0.0008	0.0016	0.001
6126	2018-01-10 14:50:00	NAM-MS46	sample	GeoChem	GeoChem Trace	DualSoil	DualSoil	120	Passed	2.5436	1.1927	6.3312	0.3021	23.8257	0.3387	< LOD	0.0478	< LOD	0.0205	0.7146	0.0165	0.0848	0.0102	2.7989	0.0271	4.0861	0.0233	< LOD	0.0062	< LOD	0.004	0.8664	0.0163	18.239	0.0611	< LOD	0.0109	0.0279	0.0053	0.0078	0.0022	0.0225	0.0021	< LOD	0.0007	< LOD	0.0008	0.0014	0.001
6127	2018-01-10 14:53:00	NAM-MS46	sample	GeoChem	GeoChem Trace	DualSoil	DualSoil	120	Passed	3.5728	1.1679	7.2499	0.3141	30.5672	0.3819	0.1997	0.0443	< LOD	0.0188	0.6834	0.0171	0.151	0.0105	2.72	0.0262	2.7723	0.0187	0.0094	0.005	< LOD	0.0036	0.9184	0.0167	16.1913	0.0565	< LOD	0.0087	0.0196	0.0041	0.0056	0.0017	0.0238	0.0019	< LOD	0.0006	< LOD	0.0007	0.0028	0.0009
6128	2018-01-10 14:55:00	NAM-MS46	sample	GeoChem	GeoChem Trace	DualSoil	DualSoil	120	Passed	2.6699	1.0892	7.2509	0.3163	27.5734	0.3638	0.1356	0.0454	< LOD	0.0195	0.6835	0.0166	0.1448	0.0106	2.9314	0.0274	3.2109	0.0204	< LOD	0.0054	< LOD	0.004	0.894	0.0165	17.0134	0.0584	< LOD	0.0096	0.0207	0.0045	0.0067	0.0019	0.0255	0.0021	< LOD	0.0006	< LOD	0.0008	0.0021	0.0009
6129	2018-01-10 14:58:00	NAM-MS46	sample	GeoChem	GeoChem Trace	DualSoil	DualSoil	120	Passed	3.1827	1.2089	6.6215	0.3082	21.5957	0.3234	0.0642	0.0461	< LOD	0.0199	0.6455	0.0157	0.1261	0.0101	2.5982	0.0262	4.5373	0.0247	< LOD	0.0065	< LOD	0.0044	0.8518	0.0162	19.5133	0.0633	< LOD	0.0117	0.027	0.0052	0.0086	0.0021	0.0222	0.002	< LOD	0.0006	< LOD	0.0008	0.0027	0.001
6130	2018-01-10 15:01:00	NAM-MS27	sample	GeoChem	GeoChem Trace	DualSoil	DualSoil	120	Passed	2.3637	1.1399	7.4924	0.3229	23.0369	0.3343	< LOD	0.0391	< LOD	0.0213	0.9272	0.0169	0.1373	0.0106	1.6128	0.0215	3.5992	0.0218	< LOD	0.006	< LOD	0.0045	0.9233	0.0166	19.6212	0.0619	< LOD	0.0116	0.026	0.0054	0.0067	0.002	0.0178	0.0019	< LOD	0.0006	< LOD	0.0008	0.0032	0.001
6131	2018-01-10 15:04:00	NAM-MS27	sample	GeoChem	GeoChem Trace	DualSoil	DualSoil	120	Passed	2.5638	1.1696	7.7307	0.3246	26.6823	0.3576	< LOD	0.0395	< LOD	0.0203	0.8401	0.0175	0.115	0.0102	1.7064	0.0217	2.4122	0.0177	< LOD	0.005	< LOD	0.004	0.9195	0.0165	18.1048	0.0587	< LOD	0.0103	0.0206	0.0048	0.0053	0.0019	0.0183	0.0019	< LOD	0.0006	< LOD	0.0008	0.0027	0.0009
6132	2018-01-10 15:06:00	NAM-MS27	sample	GeoChem	GeoChem Trace	DualSoil	DualSoil	120	Passed	2.214	1.1824	6.5167	0.3071	19.9246	0.3123	< LOD	0.043	< LOD	0.0222	0.9135	0.0174	0.0619	0.0097	1.5668	0.0215	4.4593	0.0246	0.0095	0.0068	< LOD	0.0049	0.8328	0.0158	20.4817	0.0638	< LOD	0.0126	0.0324	0.006	0.0071	0.0021	0.0253	0.0023	< LOD	0.0006	< LOD	0.0009	0.0021	0.001
6133	2018-01-10 15:09:00	NAM-MS27	sample	GeoChem	GeoChem Trace	DualSoil	DualSoil	120	Passed	2.6399	1.1621	7.3751	0.3208	20.8309	0.3181	< LOD	0.0409	< LOD	0.0221	0.8999	0.0167	0.1097	0.0103	1.9751	0.0234	4.1138	0.0235	< LOD	0.0064	< LOD	0.0044	0.8714	0.0162	20.2911	0.0636	< LOD	0.0122	0.0313	0.0058	0.0083	0.0022	0.0255	0.0023	< LOD	0.0006	< LOD	0.0009	0.0025	0.0011
6134	2018-01-10 15:11:00	NAM-MS27	sample	GeoChem	GeoChem Trace	DualSoil	DualSoil	120	Passed	2.4384	1.104	8.1288	0.3252	26.6394	0.3553	< LOD	0.0369	< LOD	0.0194	0.8963	0.0176	0.2177	0.0109	1.9598	0.0228	2.6006	0.0182	0.0123	0.005	< LOD	0.0037	0.8844	0.0162	18.033	0.0589	< LOD	0.0102	0.0208	0.0045	0.007	0.0018	0.0198	0.0019	< LOD	0.0006	< LOD	0.0007	0.0025	0.0009
6135	2018-01-10 15:14:00	NAM-MS26b	cal sample	GeoChem	GeoChem Trace	DualSoil	DualSoil	120	Passed	2.6917	1.1851	8.6291	0.3429	21.4791	0.3236	< LOD	0.0392	< LOD	0.0211	0.6506	0.016	0.1244	0.0105	1.7371	0.0222	3.3289	0.021	< LOD	0.0059	< LOD	0.0042	0.9075	0.0164	20.0309	0.0624	< LOD	0.0119	0.0228	0.0049	0.0077	0.0019	0.0263	0.0021	< LOD	0.0006	< LOD	0.0007	0.0027	0.001
6136	2018-01-10 15:17:00	NAM-MS26b	cal sample	GeoChem	GeoChem Trace	DualSoil	DualSoil	120	Passed	2.1287	1.1291	8.3626	0.3338	25.4114	0.3494	< LOD	0.0374	< LOD	0.0201	0.7338	0.0166	0.0771	0.0098	1.83	0.0225	2.8547	0.0193	< LOD	0.0054	< LOD	0.0041	1.1056	0.0181	18.6571	0.06	< LOD	0.0107	0.0172	0.0048	0.0055	0.0019	0.0203	0.002	< LOD	0.0006	< LOD	0.0007	0.0026	0.0009
6137	2018-01-10 15:19:00	NAM-MS26b	cal sample	GeoChem	GeoChem Trace	DualSoil	DualSoil	120	Passed	2.3748	1.2084	7.8442	0.3311	20.4081	0.3162	< LOD	0.039	< LOD	0.0212	0.6364	0.0156	0.169	0.0113	1.8905	0.0232	4.0814	0.0234	< LOD	0.0064	< LOD	0.0044	0.9112	0.0164	20.7114	0.0641	< LOD	0.0124	0.0242	0.0052	0.0079	0.002	0.0237	0.0021	< LOD	0.0006	< LOD	0.0008	0.0042	0.001
6138	2018-01-10 15:22:00	NAM-MS26b	cal sample	GeoChem	GeoChem Trace	DualSoil	DualSoil	120	Passed	2.4253	1.2445	7.2887	0.3265	18.967	0.3067	< LOD	0.0454	< LOD	0.0221	0.6868	0.0165	0.0733	0.0101	1.7029	0.0223	4.5173	0.0249	< LOD	0.0068	< LOD	0.0046	0.9674	0.017	21.4643	0.0657	0.0166	0.0131	0.0366	0.0064	0.0102	0.0025	0.0188	0.0021	< LOD	0.0007	< LOD	0.0009	0.0036	0.0011
6139	2018-01-10 15:25:00	NAM-MS26b	cal sample	GeoChem	GeoChem Trace	DualSoil	DualSoil	120	Passed	2.4541	1.1312	7.808	0.3251	29.0114	0.3726	< LOD	0.0374	< LOD	0.0196	0.5848	0.017	0.0511	0.0092	1.5208	0.0207	2.6227	0.0183	0.0062	0.005	< LOD	0.0042	0.9574	0.0168	17.6219	0.0579	< LOD	0.0097	0.0208	0.0045	0.0066	0.0018	0.0194	0.0019	< LOD	0.0006	< LOD	0.0007	0.002	0.0009
6140	2018-01-10 15:34:00	CRM3	CRM	GeoChem	GeoChem Trace	DualSoil	DualSoil	120	Passed	< LOD	0.6868	16.1077	0.3766	68.1113	0.5575	0.0465	0.0175	< LOD	0.0103	< LOD	0.0144	3.4081	0.0278	0.4748	0.012	< LOD	0.0023	< LOD	0.0011	0.0221	0.0016	0.1278	0.0067	0.3271	0.0079	0	0	< LOD	0.0011	0.0022	0.0006	0.0088	0.0008	< LOD	0.0005	< LOD	0.0003	0.2389	0.0019
6141	2018-01-10 15:37:00	CRM3	CRM	GeoChem	GeoChem Trace	DualSoil	DualSoil	120	Passed	< LOD	0.6913	16.0014	0.3758	67.9461	0.5566	0.0471	0.0181	< LOD	0.0102	< LOD	0.0144	3.3555	0.0276	0.4781	0.012	0.0024	0.0023	< LOD	0.0011	0.0216	0.0016	0.1292	0.0067	0.3283	0.0079	0	0	< LOD	0.0011	0.0018	0.0006	0.0087	0.0008	< LOD	0.0005	< LOD	0.0004	0.2392	0.0019
6142	2018-01-10 15:39:00	CRM3	CRM	GeoChem	GeoChem Trace	DualSoil	DualSoil	120	Passed	< LOD	0.664	16.0468	0.3757	68.364	0.5588	0.0443	0.018	< LOD	0.0102	< LOD	0.0143	3.3268	0.0275	0.4859	0.0121	< LOD	0.0023	< LOD	0.0011	0.0225	0.0017	0.1282	0.0067	0.3205	0.0078	0	0	< LOD	0.0011	0.0026	0.0006	0.0087	0.0008	< LOD	0.0005	< LOD	0.0004	0.2386	0.0019
6143	2018-01-10 15:42:00	CRM3	CRM	GeoChem	GeoChem Trace	DualSoil	DualSoil	120	Passed	< LOD	0.4881	16.157	0.3771	68.0476	0.557	0.0413	0.0177	< LOD	0.0101	< LOD	0.0144	3.3552	0.0276	0.4857	0.0121	< LOD	0.0023	0.0013	0.0012	0.0206	0.0016	0.1281	0.0067	0.3191	0.0078	0	0	< LOD	0.0011	0.0022	0.0006	0.0087	0.0008	< LOD	0.0005	< LOD	0.0003	0.239	0.0019
6144	2018-01-10 15:44:00	CRM3	CRM	GeoChem	GeoChem Trace	DualSoil	DualSoil	120	Passed	< LOD	0.6744	16.1501	0.377	68.054	0.5573	0.0384	0.0179	< LOD	0.0102	< LOD	0.0144	3.3577	0.0276	0.4648	0.0119	0.0024	0.0023	0.0013	0.0011	0.0217	0.0016	0.1251	0.0066	0.3206	0.0078	0	0	< LOD	0.0011	0.0021	0.0006	0.0091	0.0008	< LOD	0.0005	< LOD	0.0003	0.2353	0.0019
6145	2018-01-10 15:47:00	NAM-MS34c	cal sample	GeoChem	GeoChem Trace	DualSoil	DualSoil	120	Passed	1.4239	0.8325	4.842	0.2387	59.3775	0.5148	0.3996	0.0315	0.127	0.016	1.4922	0.0231	0.971	0.0161	2.0641	0.0212	0.2595	0.0055	< LOD	0.0015	0.0061	0.0017	0.1105	0.0063	2.0034	0.0192	< LOD	0.001	< LOD	0.0013	0.0027	0.0006	0.0047	0.0006	< LOD	0.0004	< LOD	0.0003	0.0068	0.0005
6146	2018-01-10 15:50:00	NAM-MS34c	cal sample	GeoChem	GeoChem Trace	DualSoil	DualSoil	121	Passed	1.0985	0.8338	4.8457	0.2376	57.7321	0.5034	0.3247	0.0297	0.1889	0.016	1.3411	0.0206	1.3298	0.0182	2.1864	0.0216	0.4765	0.007	< LOD	0.0018	0.005	0.0017	0.1499	0.0072	2.3491	0.021	< LOD	0.0012	< LOD	0.0013	0.0027	0.0006	0.0039	0.0006	< LOD	0.0003	< LOD	0.0003	0.0083	0.0005
6147	2018-01-10 15:52:00	NAM-MS34c	cal sample	GeoChem	GeoChem Trace	DualSoil	DualSoil	120	Passed	1.3574	0.7749	3.6703	0.2146	63.5981	0.534	0.2621	0.0271	0.1818	0.0153	1.3137	0.0213	1.0443	0.0163	1.5695	0.0185	0.1343	0.0042	< LOD	0.0012	0.0074	0.0016	0.0894	0.0059	1.3114	0.0155	< LOD	0.0006	< LOD	0.0012	0.0027	0.0006	0.0026	0.0005	< LOD	0.0004	< LOD	0.0003	0.0073	0.0005
6148	2018-01-10 15:55:00	NAM-MS34c	cal sample	GeoChem	GeoChem Trace	DualSoil	DualSoil	120	Passed	1.0505	0.7795	4.0647	0.2224	63.2508	0.5322	0.2274	0.0263	0.159	0.015	1.3699	0.0214	1.145	0.017	1.7068	0.0193	0.1057	0.004	< LOD	0.0013	0.0097	0.0016	0.068	0.0052	1.2181	0.015	< LOD	0.0006	< LOD	0.0012	0.0025	0.0006	0.0026	0.0005	< LOD	0.0003	< LOD	0.0003	0.0065	0.0005
6149	2018-01-10 15:58:00	NAM-MS34c	cal sample	GeoChem	GeoChem Trace	DualSoil	DualSoil	120	Passed	1.4333	0.8155	4.9516	0.2429	60.0106	0.52	0.3212	0.0305	0.1416	0.0155	1.1569	0.0207	1.4679	0.0192	1.9541	0.0208	0.4679	0.007	0.0032	0.0017	0.0061	0.0017	0.1699	0.0076	2.3048	0.0207	< LOD	0.001	< LOD	0.0013	0.0029	0.0006	0.0055	0.0007	< LOD	0.0004	< LOD	0.0003	0.0084	0.0005
6150	2018-01-10 16:01:00	NAM-MS21c	cal sample	GeoChem	GeoChem Trace	DualSoil	DualSoil	120	Passed	1.8941	0.9409	6.3127	0.2728	47.5941	0.4637	0.1906	0.0282	0.1546	0.0169	1.1119	0.0191	0.6615	0.0142	2.0991	0.0221	0.271	0.0063	0.0045	0.0021	0.0036	0.0023	0.5778	0.0133	7.936	0.0382	< LOD	0.0037	0.0038	0.002	0.0032	0.0009	0.0177	0.0013	< LOD	0.0004	< LOD	0.0004	0.0035	0.0006
6151	2018-01-10 16:03:00	NAM-MS21c	cal sample	GeoChem	GeoChem Trace	DualSoil	DualSoil	120	Passed	1.6245	0.8516	5.8759	0.2634	48.1165	0.4652	0.1989	0.0275	0.1586	0.0169	1.1038	0.0192	0.5505	0.0132	2.113	0.022	0.415	0.0072	0.0058	0.0021	0.0038	0.0022	0.5135	0.0126	7.8693	0.038	< LOD	0.0036	0.0055	0.0021	0.0037	0.0009	0.0145	0.0012	< LOD	0.0004	< LOD	0.0004	0.0031	0.0006
6152	2018-01-10 16:08:00	NAM-MS21c	cal sample	GeoChem	GeoChem Trace	DualSoil	DualSoil	120	Passed	2.0514	0.9229	5.7597	0.2627	48.1277	0.466	0.1231	0.027	0.1322	0.0162	1.1632	0.0193	0.5353	0.0131	2.8054	0.0251	0.297	0.0065	0.0034	0.0021	0.0109	0.0023	0.5538	0.0131	7.973	0.0386	< LOD	0.0036	0.0039	0.002	0.0036	0.0009	0.0152	0.0012	< LOD	0.0004	< LOD	0.0004	0.0033	0.0006
6153	2018-01-10 16:11:00	NAM-MS21c	cal sample	GeoChem	GeoChem Trace	DualSoil	DualSoil	120	Passed	2.0292	0.9108	6.337	0.2724	48.5087	0.4683	0.3506	0.0323	0.1723	0.0168	1.0831	0.019	0.5812	0.0134	2.5459	0.0239	0.3473	0.0067	0.0039	0.0021	< LOD	0.0022	0.5531	0.0131	7.8759	0.0383	< LOD	0.0035	0.0047	0.0021	0.0033	0.0008	0.0148	0.0012	< LOD	0.0004	< LOD	0.0004	0.0034	0.0006
6154	2018-01-10 16:13:00	NAM-MS21c	cal sample	GeoChem	GeoChem Trace	DualSoil	DualSoil	121	Passed	2.4969	0.9309	5.8426	0.2619	48.9671	0.4666	0.2121	0.0282	0.1705	0.0166	1.0495	0.019	0.6651	0.0139	2.1835	0.022	0.4612	0.0074	< LOD	0.0021	0.01	0.0022	0.5577	0.0131	7.9024	0.0382	< LOD	0.0035	0.0042	0.002	0.0037	0.0009	0.0152	0.0012	< LOD	0.0004	< LOD	0.0004	0.0036	0.0006
6155	2018-01-10 16:16:00	NAM-MS26c	cal sample	GeoChem	GeoChem Trace	DualSoil	DualSoil	120	Passed	2.4799	1.1434	7.7303	0.3302	20.0636	0.3145	0.1852	0.0445	< LOD	0.0218	0.545	0.0161	0.0399	0.0097	2.0275	0.0239	3.629	0.0222	< LOD	0.0062	< LOD	0.0042	0.9211	0.0165	20.5563	0.0636	< LOD	0.0125	0.0233	0.0053	0.0071	0.002	0.0226	0.0021	< LOD	0.0006	< LOD	0.0008	0.003	0.001
6156	2018-01-10 16:19:00	NAM-MS26c	cal sample	GeoChem	GeoChem Trace	DualSoil	DualSoil	122	Passed	2.2923	1.1203	8.1892	0.3256	24.8983	0.3402	< LOD	0.0374	< LOD	0.02	0.547	0.0157	0.1009	0.0099	2.101	0.0235	3.0354	0.0195	< LOD	0.0054	< LOD	0.0038	1.0961	0.018	18.5441	0.0601	< LOD	0.0108	0.024	0.0047	0.0081	0.0019	0.0215	0.0019	< LOD	0.0006	< LOD	0.0007	0.0019	0.0009
6157	2018-01-10 16:22:00	NAM-MS26c	cal sample	GeoChem	GeoChem Trace	DualSoil	DualSoil	121	Passed	2.735	1.2285	7.8973	0.3329	19.005	0.3045	< LOD	0.0423	< LOD	0.0219	0.6779	0.0154	0.0642	0.0096	1.6624	0.0218	3.5789	0.022	< LOD	0.0062	< LOD	0.0045	0.9005	0.0163	21.3978	0.0648	< LOD	0.0131	0.0256	0.0057	0.009	0.0023	0.0229	0.0021	< LOD	0.0006	< LOD	0.0008	0.003	0.001
6158	2018-01-10 16:24:00	NAM-MS26c	cal sample	GeoChem	GeoChem Trace	DualSoil	DualSoil	120	Passed	2.863	1.2393	8.2028	0.3367	21.3853	0.324	0.216	0.044	< LOD	0.0214	0.5849	0.0154	0.0545	0.0095	1.9779	0.0234	3.2383	0.0209	< LOD	0.0059	< LOD	0.0045	0.9755	0.017	20.322	0.063	< LOD	0.0121	0.0185	0.0051	0.0065	0.002	0.0217	0.002	< LOD	0.0006	< LOD	0.0008	0.0029	0.001
6159	2018-01-10 16:27:00	NAM-MS26c	cal sample	GeoChem	GeoChem Trace	DualSoil	DualSoil	121	Passed	2.6016	1.337	8.257	0.3335	21.7141	0.3225	0.047	0.0401	< LOD	0.021	0.6271	0.015	0.0814	0.0098	2.1157	0.0238	3.492	0.0214	< LOD	0.0061	< LOD	0.004	0.9759	0.017	19.5962	0.0621	< LOD	0.0117	0.0228	0.005	0.0085	0.002	0.0245	0.0021	< LOD	0.0006	< LOD	0.0008	0.0028	0.0009
6160	2018-01-10 16:30:00	CS-M2	cal std	GeoChem	GeoChem Trace	DualSoil	DualSoil	61	Passed	< LOD	1.0403	12.9273	0.4995	73.1478	0.8319	0.0578	0.0318	0.123	0.0192	< LOD	0.0217	4.8104	0.0461	0.9443	0.0219	0.1554	0.0056	< LOD	0.0016	0.0061	0.0023	0.0917	0.0087	1.5971	0.0244	0	0	< LOD	0.0019	0.0237	0.0019	0.0706	0.0029	0.0078	0.0018	< LOD	0.0006	0.0146	0.0009
6161	2018-01-10 16:32:00	CS-M2	cal std	GeoChem	GeoChem Trace	DualSoil	DualSoil	61	Passed	< LOD	1.0434	12.9223	0.4988	72.5205	0.8265	0.0665	0.031	0.1354	0.0193	< LOD	0.0218	4.8363	0.0462	0.9285	0.0218	0.1528	0.0057	0.002	0.0017	0.0073	0.0023	0.0882	0.0087	1.5977	0.0245	0	0	0.0023	0.002	0.0227	0.0019	0.0735	0.0029	0.0073	0.0018	< LOD	0.0006	0.0142	0.0009
6162	2018-01-10 16:33:00	CS-M2	cal std	GeoChem	GeoChem Trace	DualSoil	DualSoil	62	Passed	< LOD	1.0433	12.7629	0.4897	72.6381	0.8148	0.0734	0.0302	0.1283	0.0188	< LOD	0.0213	4.8185	0.0454	0.9299	0.0215	0.1521	0.0056	< LOD	0.0016	0.0059	0.0022	0.0958	0.0088	1.5874	0.0244	0	0	< LOD	0.0019	0.0227	0.0019	0.0733	0.0029	0.008	0.0018	< LOD	0.0005	0.0141	0.0009
6163	2018-01-10 16:35:00	CS-M2	cal std	GeoChem	GeoChem Trace	DualSoil	DualSoil	62	Passed	< LOD	1.0547	13.4151	0.4988	72.8784	0.8163	0.068	0.0304	0.142	0.0191	< LOD	0.0214	4.8568	0.0456	0.9319	0.0214	0.1514	0.0055	< LOD	0.0016	0.0085	0.0022	0.0955	0.0088	1.6026	0.0245	0	0	< LOD	0.0019	0.0218	0.0019	0.0748	0.003	0.0063	0.0018	< LOD	0.0006	0.0148	0.0009
6164	2018-01-10 16:39:00	CS-M2	cal std	GeoChem	GeoChem Trace	DualSoil	DualSoil	62	Passed	< LOD	1.0532	13.043	0.4936	73.0803	0.8181	0.0717	0.0308	0.1266	0.0188	0.0274	0.0215	4.8267	0.0454	0.9295	0.0214	0.1518	0.0055	< LOD	0.0016	0.0054	0.0022	0.0957	0.0089	1.6152	0.0246	0	0	0.0028	0.002	0.0246	0.002	0.0738	0.0029	0.0062	0.0018	< LOD	0.0006	0.0147	0.0009
6165	2018-01-10 16:41:00	CS-M2	cal std	GeoChem	GeoChem Trace	DualSoil	DualSoil	61	Passed	< LOD	0.9989	13.1699	0.5012	72.8869	0.8293	0.0755	0.031	0.1383	0.0193	< LOD	0.0216	4.8306	0.0462	0.9194	0.0216	0.1517	0.0056	0.0018	0.0016	0.0071	0.0022	0.0962	0.0088	1.6111	0.0245	0	0	0.0033	0.002	0.0246	0.002	0.0722	0.0029	0.0066	0.0018	< LOD	0.0006	0.0147	0.0009
6166	2018-01-10 16:42:00	CS-M2	cal std	GeoChem	GeoChem Trace	DualSoil	DualSoil	60	Passed	< LOD	1.0604	13.0001	0.5081	72.8539	0.8429	0.0652	0.0311	0.1341	0.0195	< LOD	0.0219	4.8137	0.0469	0.9298	0.0221	0.1504	0.0057	< LOD	0.0016	0.0075	0.0023	0.096	0.009	1.5889	0.0244	0	0	0.002	0.002	0.022	0.0019	0.0743	0.003	0.0083	0.0019	< LOD	0.0006	0.0146	0.0009
6167	2018-01-10 16:44:00	CS-M2	cal std	GeoChem	GeoChem Trace	DualSoil	DualSoil	60	Passed	< LOD	1.1351	13.1351	0.5126	73.0324	0.8447	0.0734	0.0322	0.1187	0.0192	< LOD	0.0221	4.8342	0.047	0.9333	0.0221	0.1519	0.0057	< LOD	0.0016	0.0061	0.0023	0.0943	0.0088	1.5907	0.0244	0	0	< LOD	0.0019	0.0232	0.0019	0.0744	0.0029	0.0079	0.0018	< LOD	0.0006	0.0142	0.0009
6168	2018-01-10 16:47:00	CS-M2	cal std	GeoChem	GeoChem Trace	DualSoil	DualSoil	61	Passed	< LOD	1.0515	13.1305	0.5022	72.9387	0.8299	0.0593	0.031	0.1366	0.0193	< LOD	0.0217	4.8205	0.0461	0.9397	0.0218	0.1549	0.0056	< LOD	0.0016	0.0062	0.0022	0.0962	0.0089	1.5993	0.0245	0	0	< LOD	0.002	0.0231	0.002	0.0745	0.003	0.0059	0.0018	< LOD	0.0006	0.015	0.0009
6169	2018-01-10 16:49:00	CS-M2	cal std	GeoChem	GeoChem Trace	DualSoil	DualSoil	60	Passed	< LOD	1.0904	13.2188	0.5116	72.6246	0.8407	0.0692	0.0313	0.1376	0.0195	< LOD	0.0218	4.8046	0.0468	0.9231	0.022	0.151	0.0057	< LOD	0.0016	0.0084	0.0023	0.0962	0.0088	1.5932	0.0244	0	0	< LOD	0.0019	0.0231	0.002	0.0734	0.003	0.0083	0.0018	< LOD	0.0006	0.0148	0.0009
6170	2018-01-10 16:51:00	CS-M2	cal std	GeoChem	GeoChem Trace			61	Passed	< LOD	1.0571	13.0725	0.5016	72.8601	0.8295	0.068	0.0311	0.1321	0.0192	< LOD	0.0217	4.8252	0.0462	0.9309	0.0218	0.1524	0.0056	< LOD	0.0016	0.0069	0.0023	0.0946	0.0088	1.5983	0.0244	0	0	< LOD	0.002	0.0232	0.0019	0.0735	0.0029	0.0073	0.0018	< LOD	0.0006	0.0146	0.0009
[truncated: 50 more columns]
